# Supplementary material for: A cyclometalated Ir(iii)–NHC complex as a recyclable catalyst for acceptorless dehydrogenation of alcohols to carboxylic acids
Source: Royal Society of Chemistry journal article supplement (doi:10.1039/d0dt02341h), 2020-01-01
Supplement: d0dt02341h1.pdf [file d0dt02341h1.pdf]

## Supporting Information

### **Cyclometalated Ir(III)-NHC complex as recyclable catalyst for acceptorless dehydrogenation of alcohols to carboxylic acids**

Dhrubajit Borah,<sup>a,b</sup> Biswajit Saha,<sup>c,d</sup> Bipul Sarma,<sup>e</sup> Pankaj Das\*<sup>a</sup>

<sup>a</sup> Department of Chemistry, Dibrugarh University, Dibrugarh, Assam, India, 786004.

<sup>b</sup> Department of Chemistry, N. N. Saikia College, Titabar, Assam, India, 785630.

<sup>c</sup> Advanced Materials Group, Materials Sciences and Technology Division, CSIR-North East Institute of Science and Technology, Jorhat 785006 Assam, India

<sup>d</sup> Academy of Scientific and Innovative Research (AcSIR), CSIR-NEIST Campus, Jorhat 785006, India

<sup>e</sup> Department of Chemical Sciences, Tezpur University, Napaam, Tezpur, Assam, India, 784028

## Table of Contents

|                                                                                                                                                                    | Page No |
|--------------------------------------------------------------------------------------------------------------------------------------------------------------------|---------|
| Scheme 1. Proposed reaction mechanism                                                                                                                              | S3      |
| Figure S1-S2: $^1\text{H}$ & $^{13}\text{C}$ NMR of Ligand Precursor $\text{L}_1$ in $\text{CD}_3\text{OD}$                                                        | S4–S5   |
| Figure S3: HRMS of Ligand Precursor $\text{L}_1$                                                                                                                   | S6      |
| Figure S4–S6: $^1\text{H}$ , $^{13}\text{C}$ & $^{19}\text{F}$ NMR of Complex <b>1a</b> in $\text{CDCl}_3$                                                         | S7–S9   |
| Figure S7: HRMS of Complex <b>1a</b>                                                                                                                               | S10     |
| Figure S8–S10: $^1\text{H}$ , $^{13}\text{C}$ & $^{19}\text{F}$ NMR of Ligand Precursor $\text{L}_2$ in $\text{DMSO}-d_6$                                          | S11–S13 |
| Figure S11: HRMS of Ligand Precursor $\text{L}_2$                                                                                                                  | S14     |
| Figure S12–S14. $^1\text{H}$ , $^{13}\text{C}$ & $^{19}\text{F}$ NMR of Complex <b>1b</b> in $\text{CDCl}_3$                                                       | S15–S17 |
| Figure S15. HRMS of Complex <b>1b</b>                                                                                                                              | S18     |
| Figure S16-S17 $^1\text{H}$ & $^{13}\text{C}$ NMR of Ligand Precursor $\text{L}_3$ in $\text{CD}_3\text{OD}$                                                       | S19-S20 |
| Figure S18- LC-MS Spectra of Ligand $\text{L}_3$                                                                                                                   | S21     |
| Figure S19-S20- $^1\text{H}$ & $^{13}\text{C}$ NMR of Complex <b>1c</b> in $\text{CDCl}_3$                                                                         | S22-S23 |
| Figure S21- HRMS of Complex <b>1c</b>                                                                                                                              | S24     |
| Figure S22 - $^1\text{H}$ NMR of in situ Ir-H from complex 1a at $50^\circ\text{C}$<br>in toluene $d_8$                                                            | S25     |
| Figure S23 $^1\text{H}$ NMR of in situ Ir-H from complex 1a at $120^\circ\text{C}$ in toluene $d_8$                                                                | S26     |
| Figure S24- Time conversion graph                                                                                                                                  | S27     |
| Figure S25- HRMS spectrum of the reaction mixture 1b and KOH (Stability test)                                                                                      | S28     |
| Figure S26–S61. $^1\text{H}$ & $^{13}\text{C}$ NMR of Acids.                                                                                                       | S29–S65 |
| Figure S62. $^1\text{H}$ NMR Spectrum of reaction products (dehydrogenation of benzaldehyde) in $\text{CD}_3\text{OD}$                                             | S66     |
| Figure S63. $^1\text{H}$ NMR of reaction products (dehydrogenation of benzyl alcohol) in $\text{CD}_3\text{OD}$ catalysed by $[\text{Ir}(\text{Cp}^*)\text{Cl}_2]$ | S67     |
| Figure S64. ESI-MS spectrum of the catalytic mixture                                                                                                               | S67     |
| Figure S65. Reusability of catalyst <b>1a</b> for dehydrogenation reactions.                                                                                       | S67     |

Table S1: Crystallographic data

S68

## 1. Proposed reaction mechanism

The first step of the reaction would involve generation of an alkoxy-iridium species I by the reaction of complex **1a** with benzyl alcohol in presence of base KOH. Notably, formation of similar iridium-alkoxide species was also observed by Williams et. al.<sup>1</sup> Thereafter, the alkoxy-iridium species I would undergo a  $\beta$ -hydrogen elimination leads to the formation of hydrido-iridium species II with concomitant release of an aldehyde molecule. Next, the hydrido-intermediate II would possibly react with an aldehyde and water release a hydrogen molecule and generate intermediate III (through intermediate A) which subsequently would release another molecule of H<sub>2</sub> to give intermediate IV. The potassium salt of the acid would finally be produced by the reaction of IV with benzyl alcohol and KOH and thus the cycle continues. The existence of possible species I and IV was evidenced by the *in situ* ESI/MS spectra of the catalytic system with *m/z* 716.67 and 730.42 (See supporting information Fig S64) respectively and hydrido intermediate I was detected through *in situ* <sup>1</sup>H NMR spectroscopy. Although, the existence of the intermediary species III could not be traced, literature evidence suggests this is the most likely species involved in the process.<sup>2,3</sup>

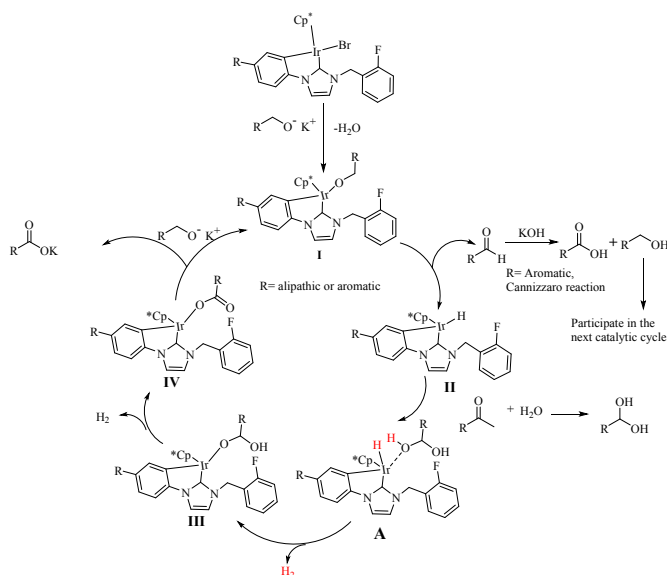

## References

1. V. Cherepakhin, T. J. Williams, *ACS Catal.*, 2018, **8**, 3754–3763.
2. D. Gong, B. Hu and D. Chen, *Dalton Trans.*, 2019, **48**, 8826.

3. A. Sarbajna, I. Dutta, P. Daw, S. Dinda, W. S. M. Rahaman, A. Sarkar, J. K. Bera, *ACS Catal.*, 2017, 7, 4, 2786–2790.

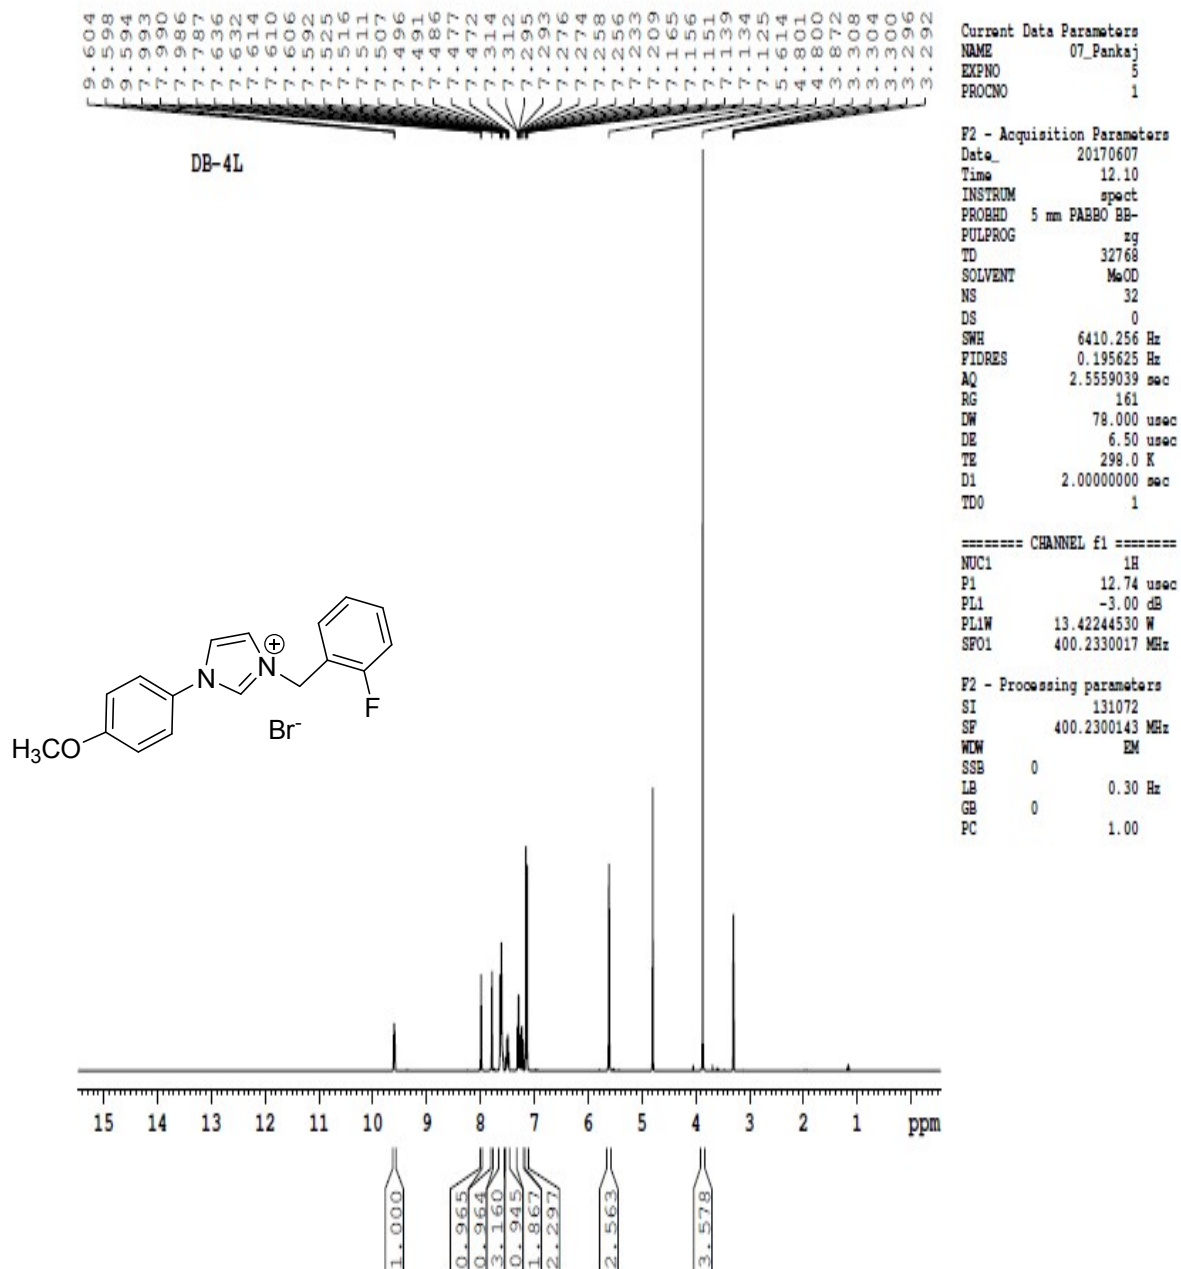

Figure S1.  $^1\text{H}$  NMR of Ligand Precursor  $L_1$  in  $\text{CD}_3\text{OD}$

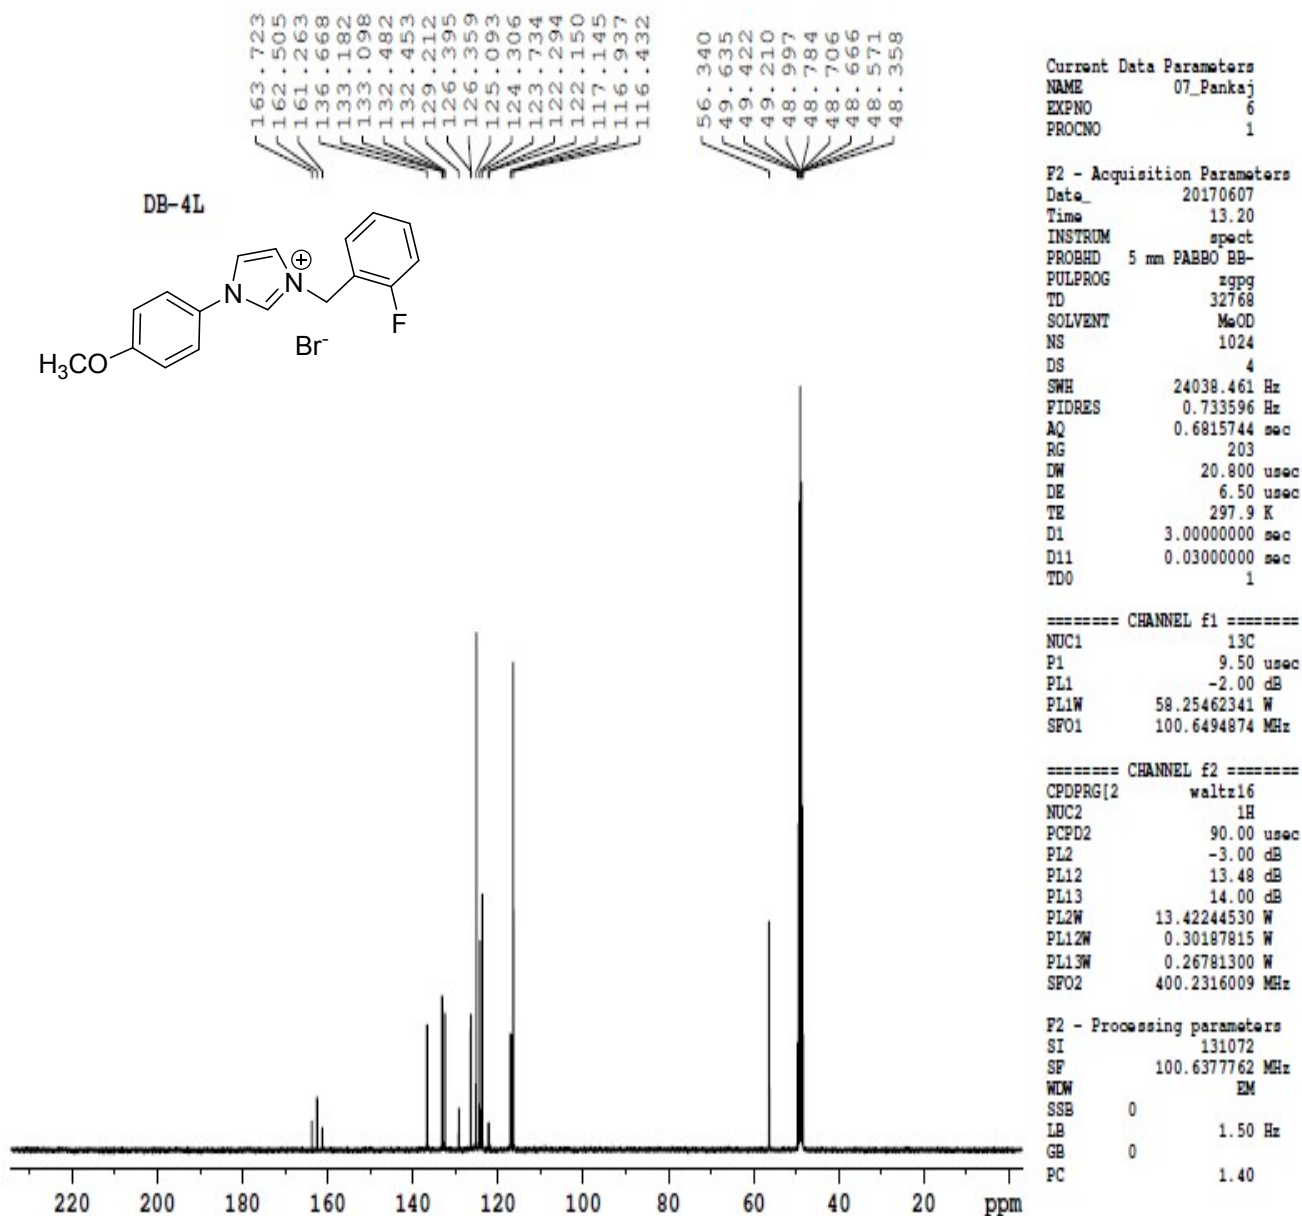Figure S2.  $^{13}\text{C}$  NMR of Ligand Precursor  $L_1$  in  $\text{CD}_3\text{OD}$

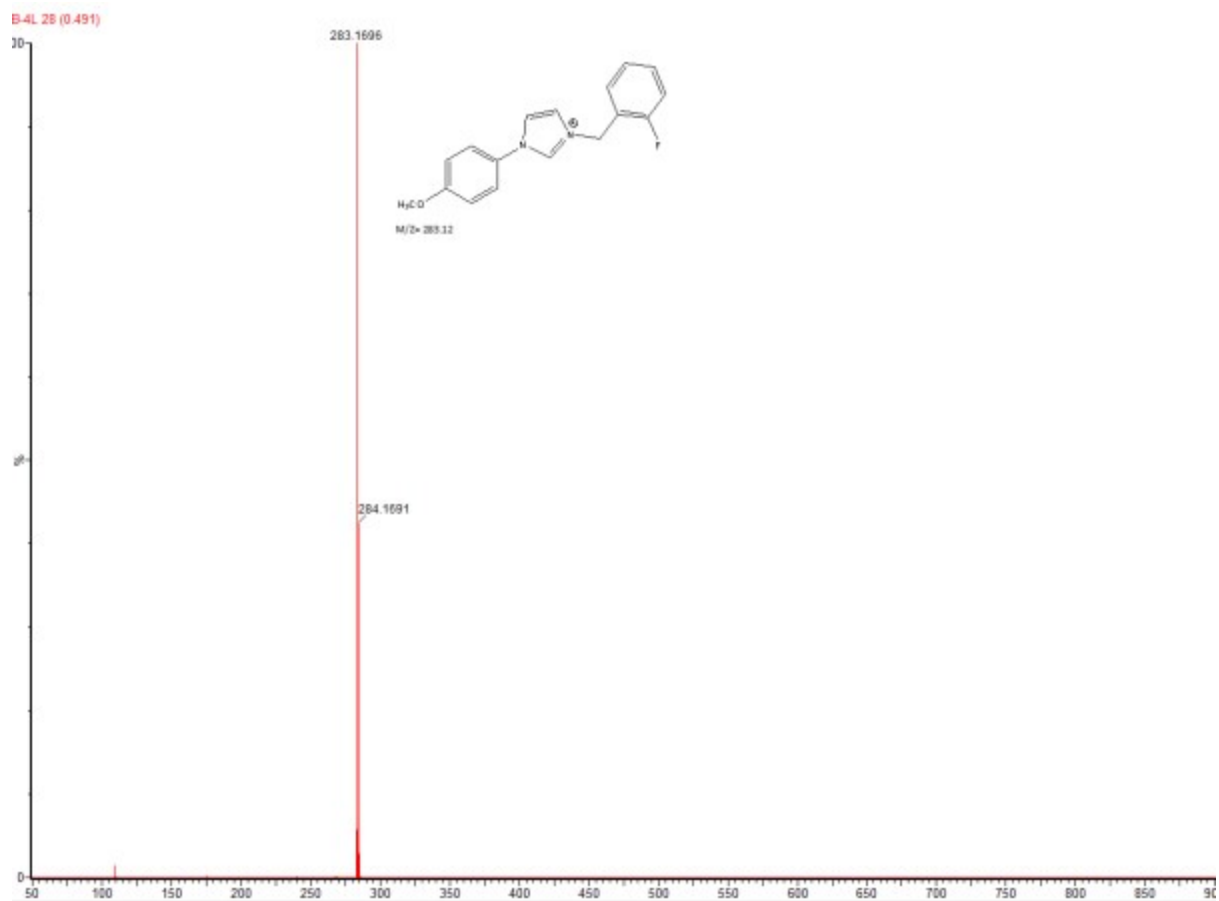

Figure S3. HRMS of Ligand Precursor L<sub>1</sub>

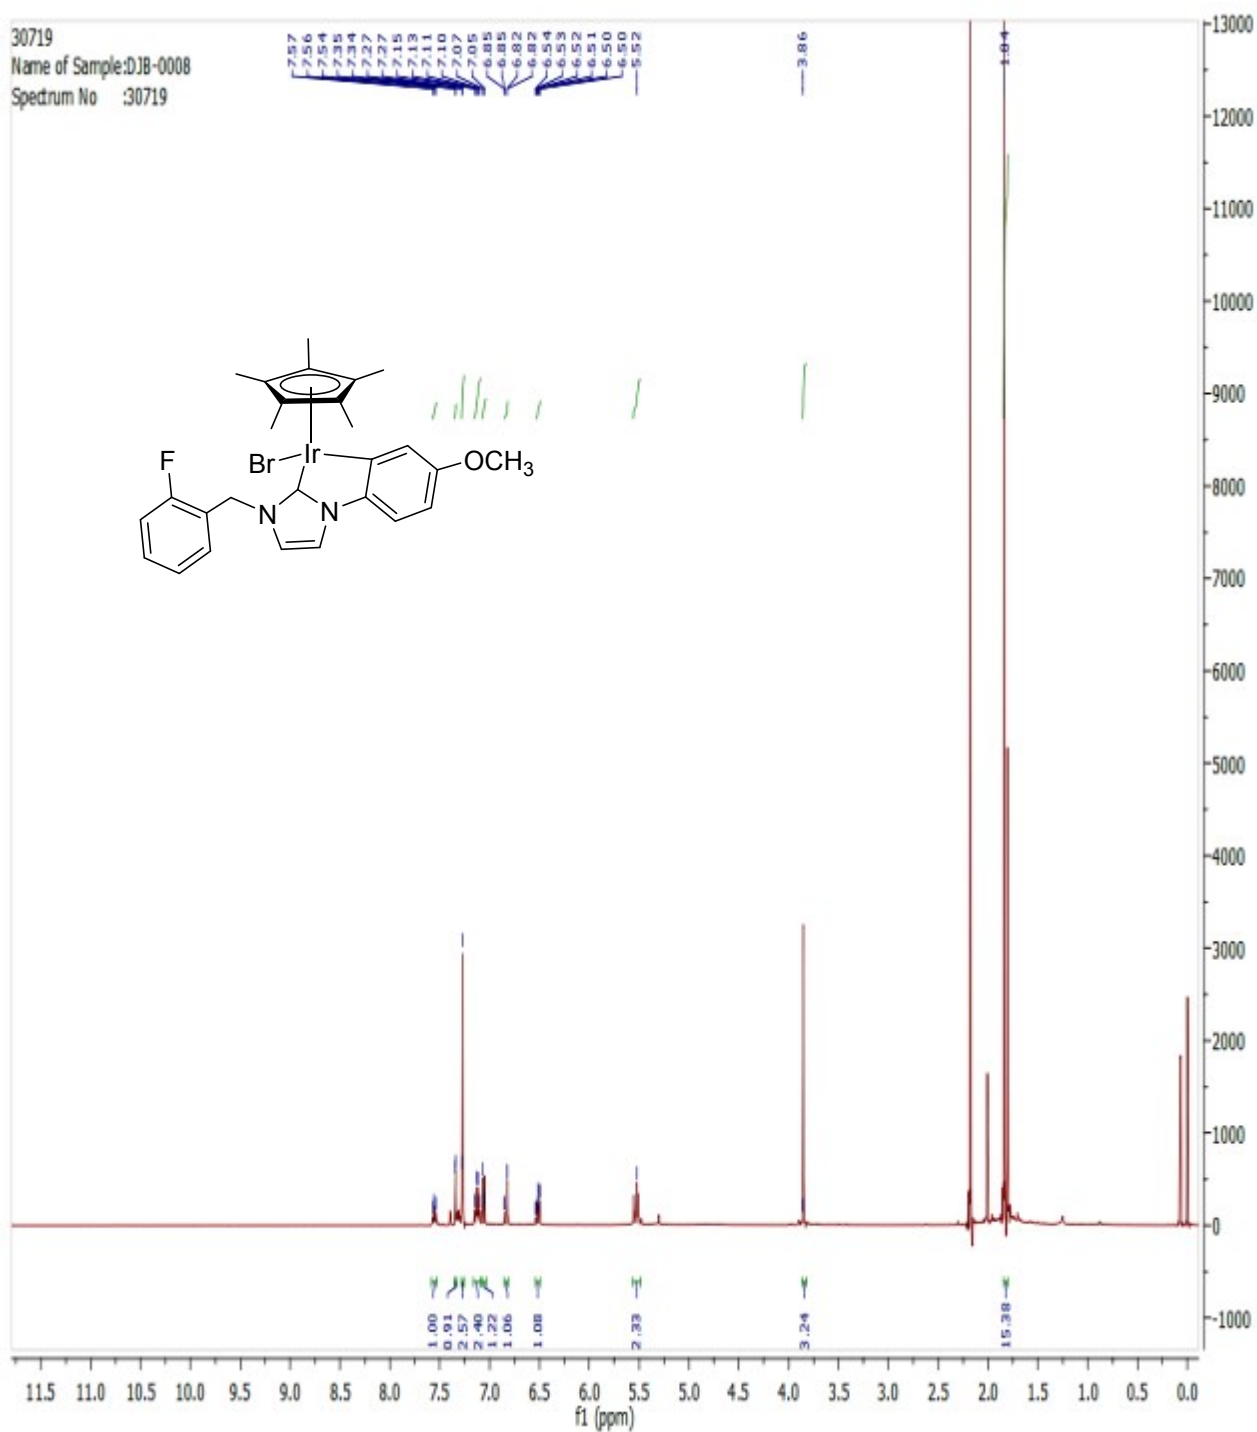Figure S4.  $^1\text{H}$  NMR of Complex **1a** in  $\text{CDCl}_3$

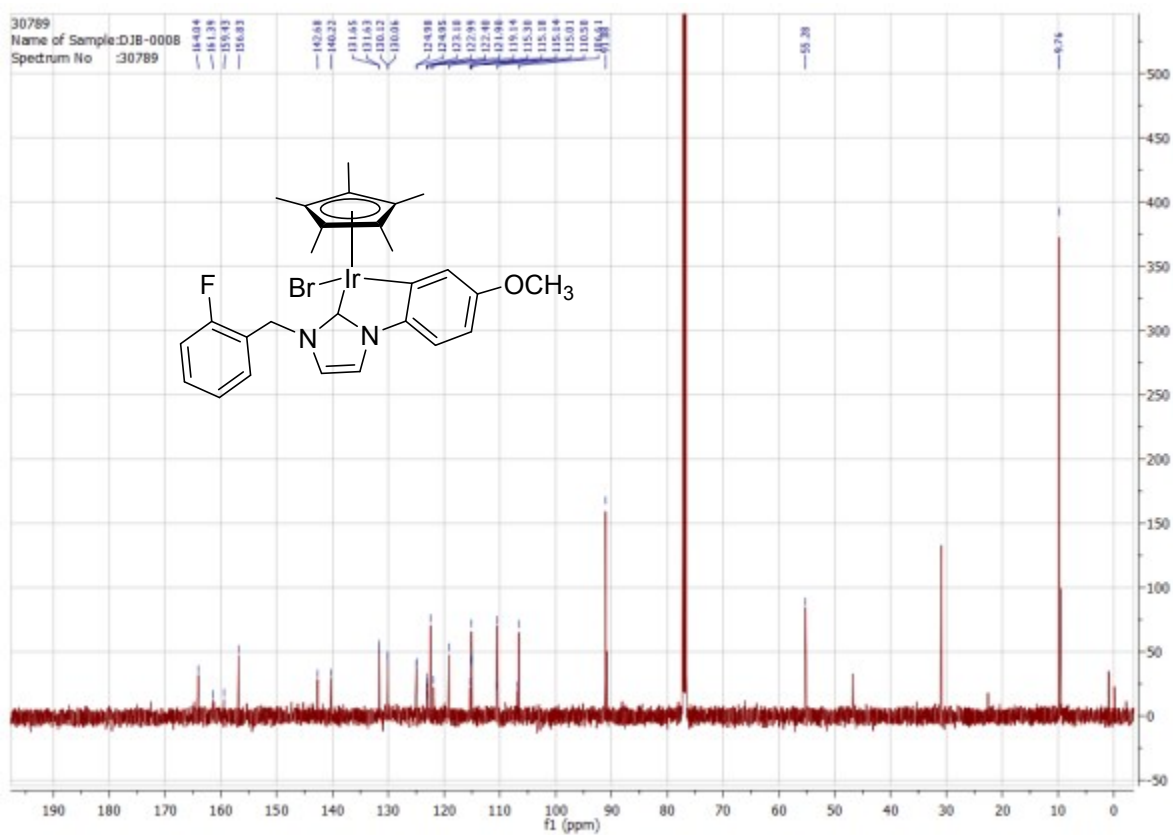

Figure S5.  $^{13}\text{C}$  NMR of Complex **1a** in  $\text{CDCl}_3$



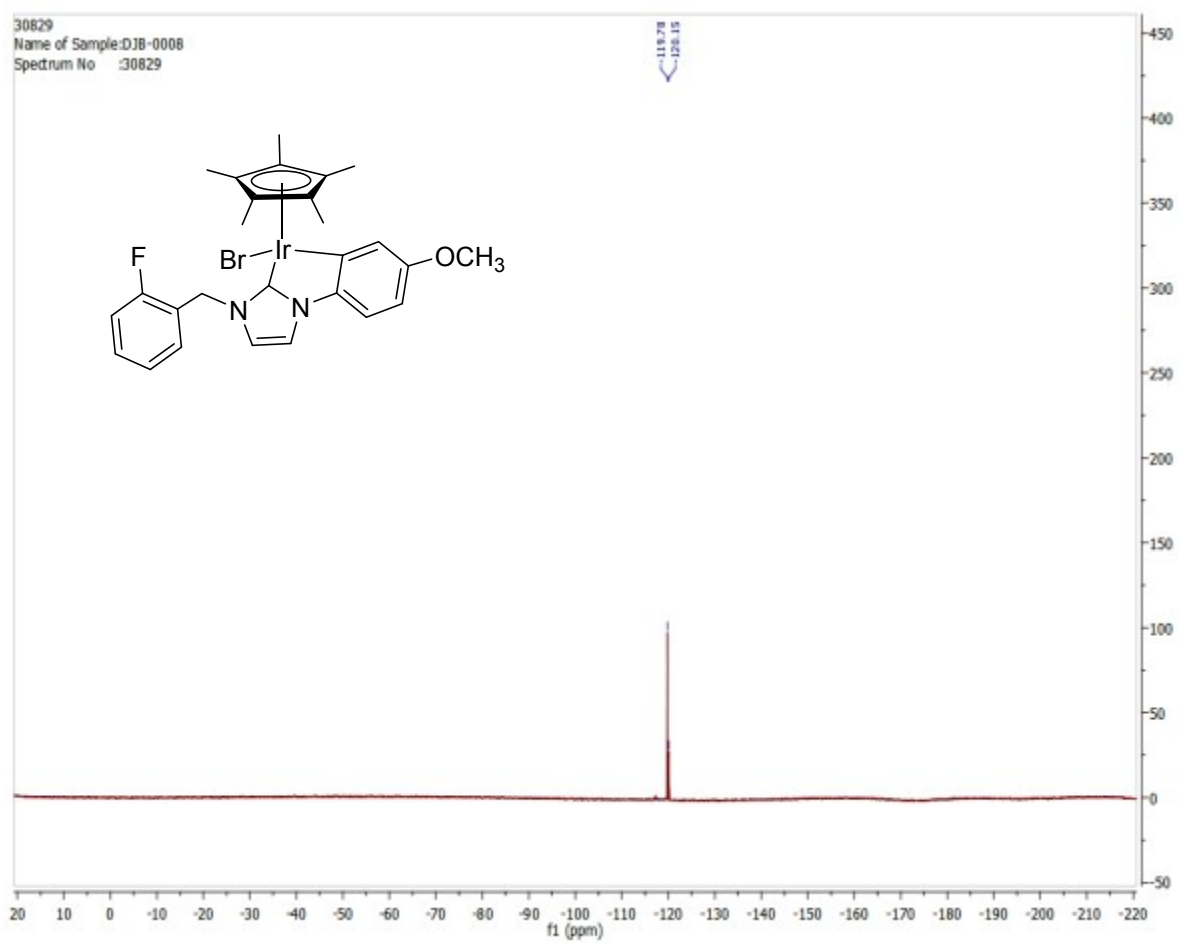

Figure S6.  $^{19}\text{F}$  NMR of Complex **1a** in  $\text{CDCl}_3$

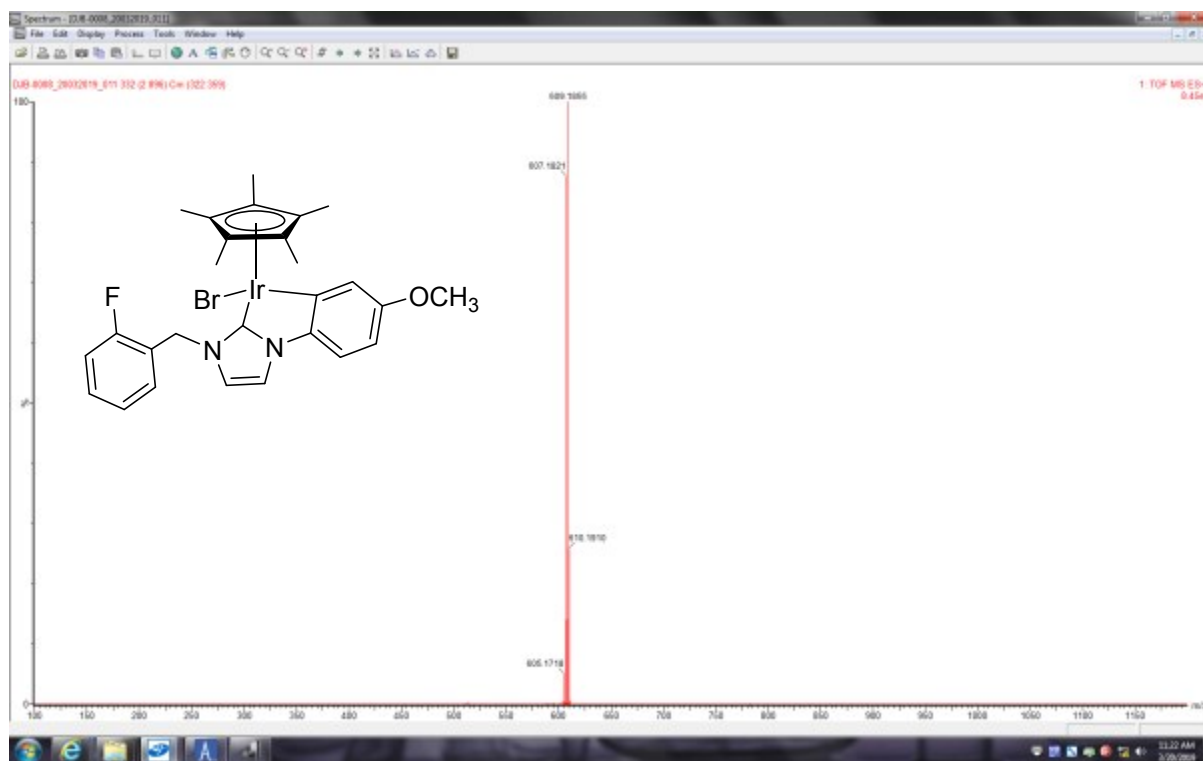

Figure S7. HRMS of Complex 1a

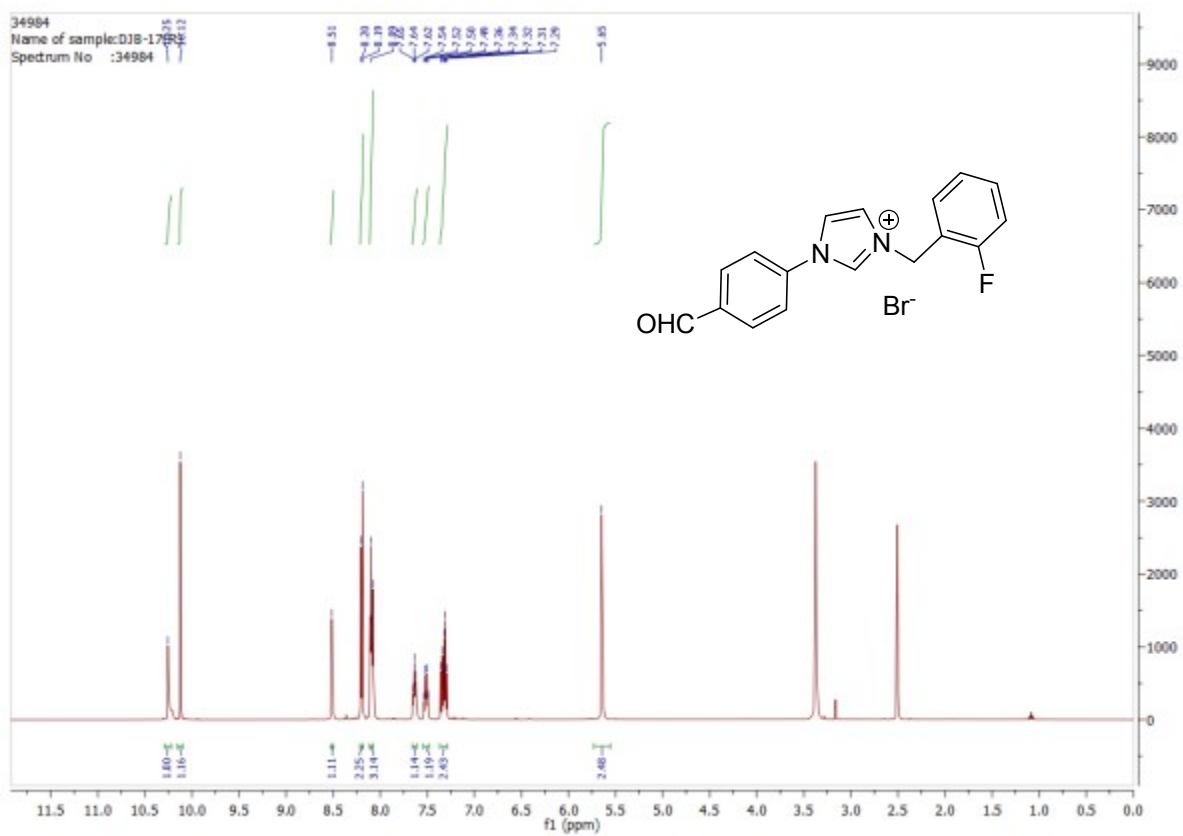

Figure S8.  $^1\text{H}$  NMR of Ligand Precursor L<sub>2</sub> in DMSO-d<sub>6</sub>

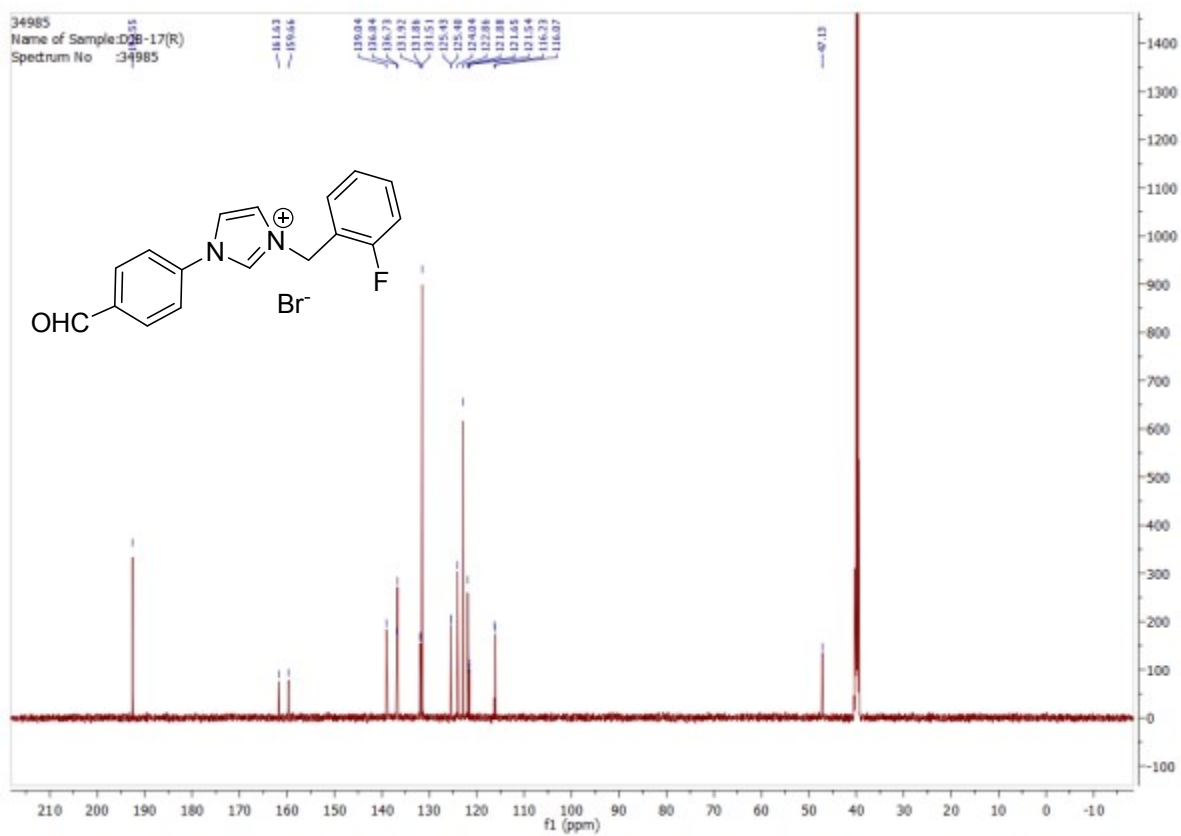

Figure S9. <sup>13</sup>C NMR of Ligand Precursor L<sub>2</sub> in DMSO-d<sub>6</sub>

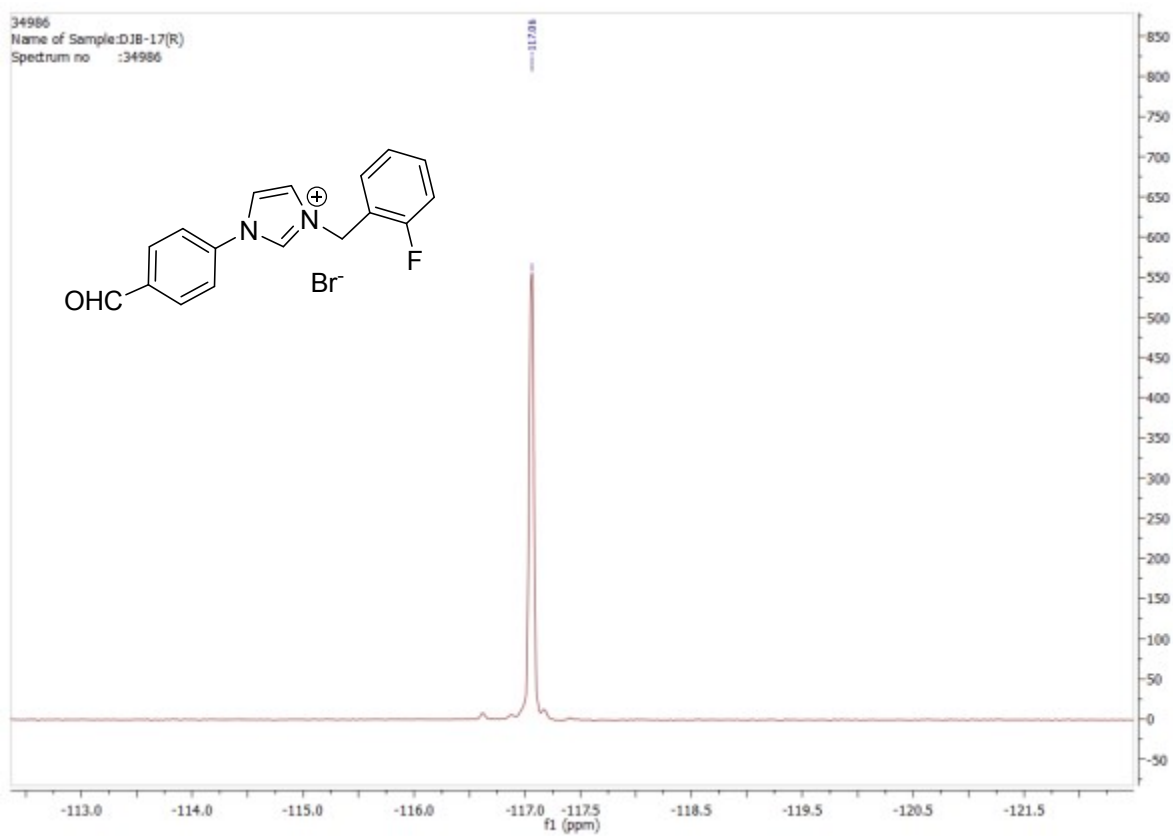

Figure S10. <sup>19</sup>F NMR of Ligand Precursor L<sub>2</sub> in DMSO-d<sub>6</sub>

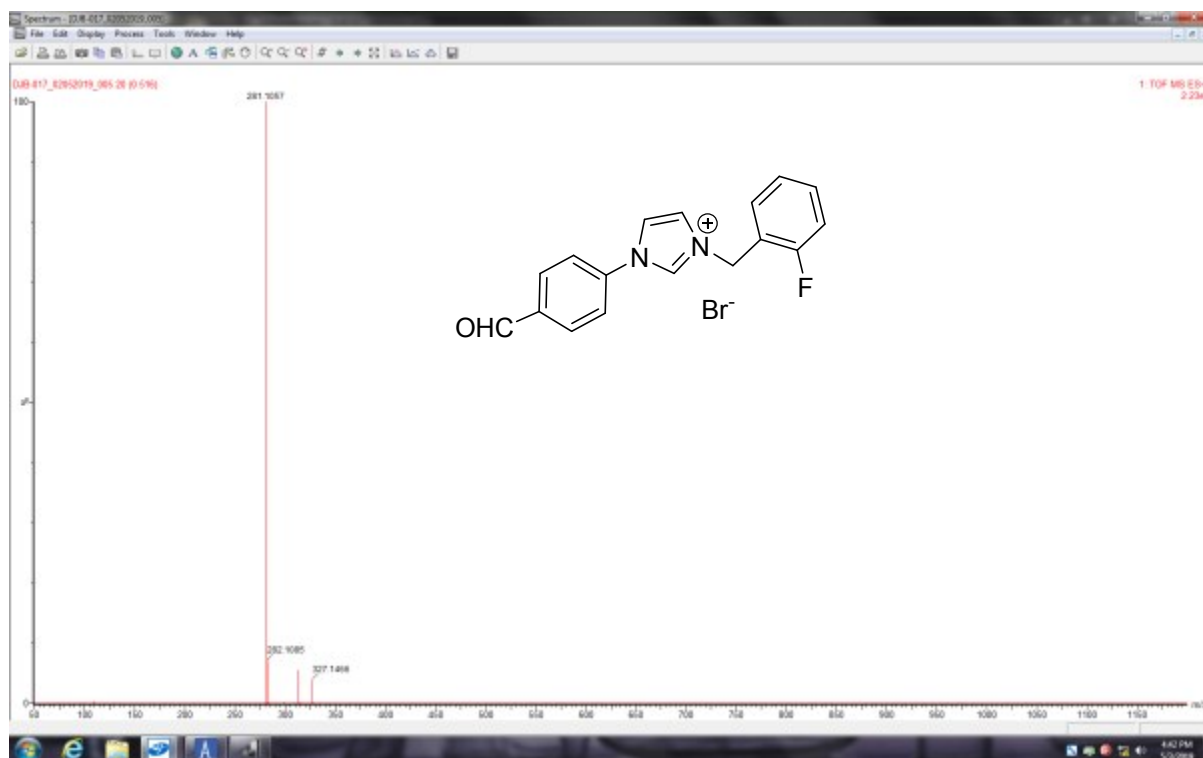Figure S11. HRMS of Ligand Precursor L<sub>2</sub>

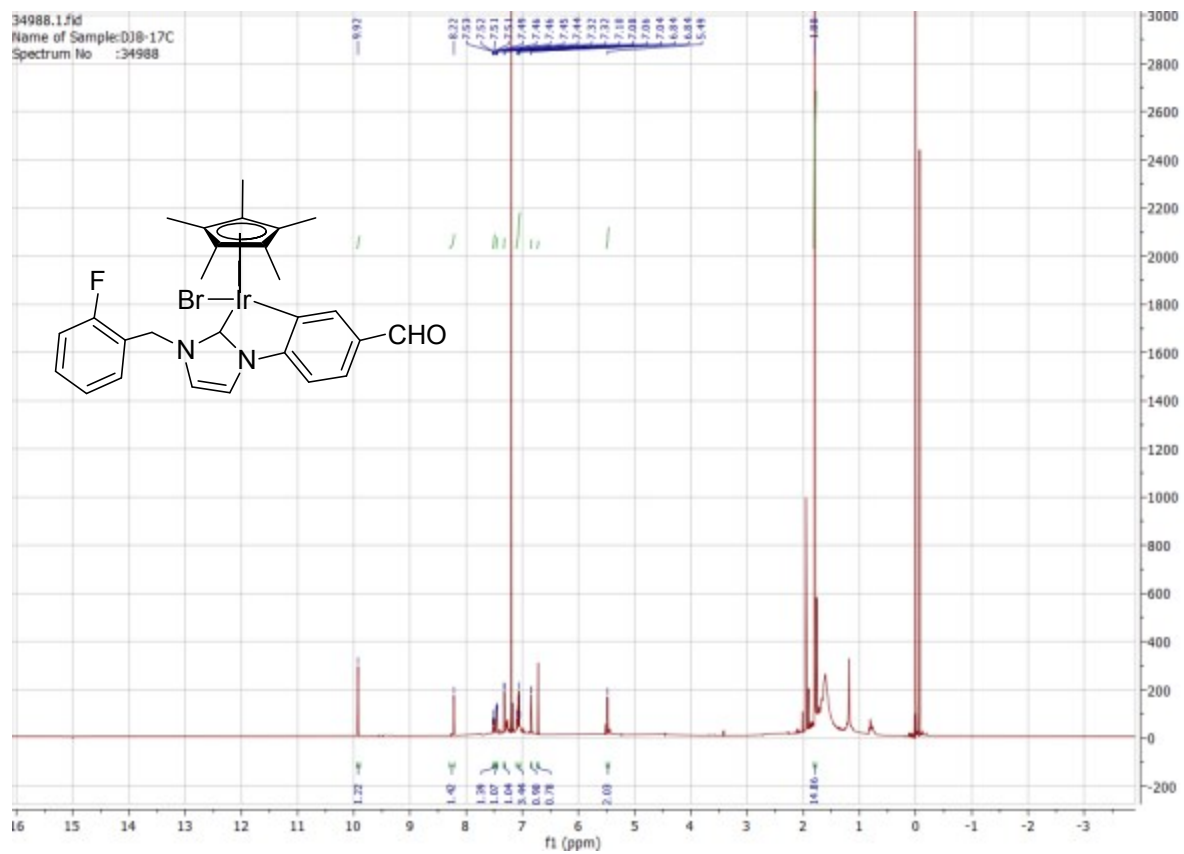

Figure S12.  $^1\text{H NMR}$  of Complex **1b** in  $\text{CDCl}_3$

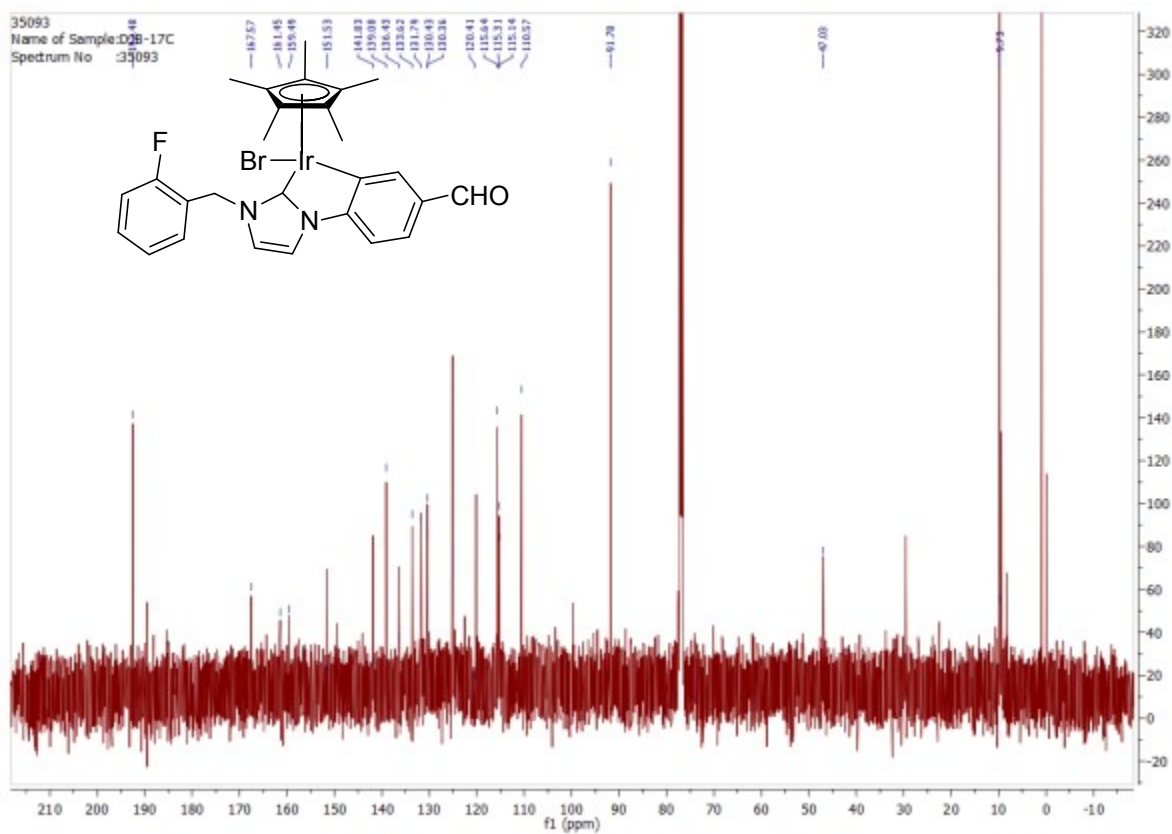

Figure S13.  $^{13}\text{C}$  NMR of Complex **1b** in  $\text{CDCl}_3$



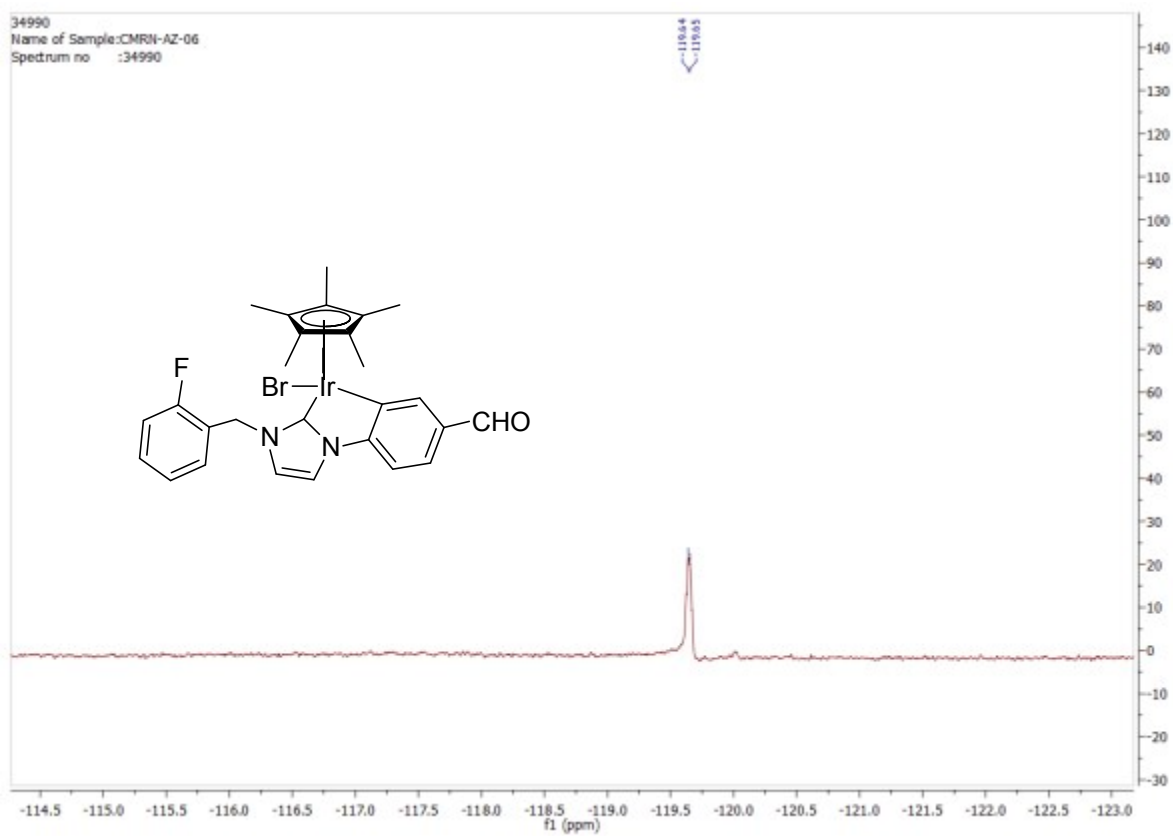

Figure S14.  $^{19}\text{F}$  NMR of Complex **1b** in  $\text{CDCl}_3$

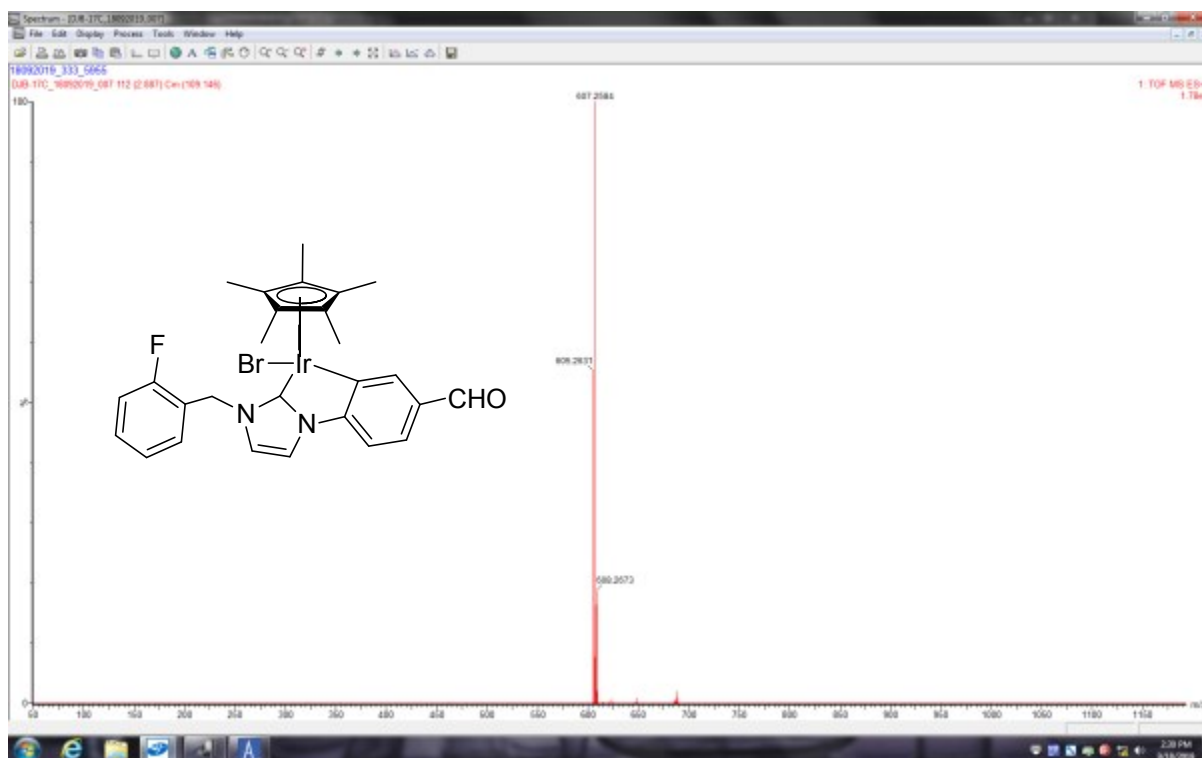Figure S15. HRMS Spectrum of Complex **1b**

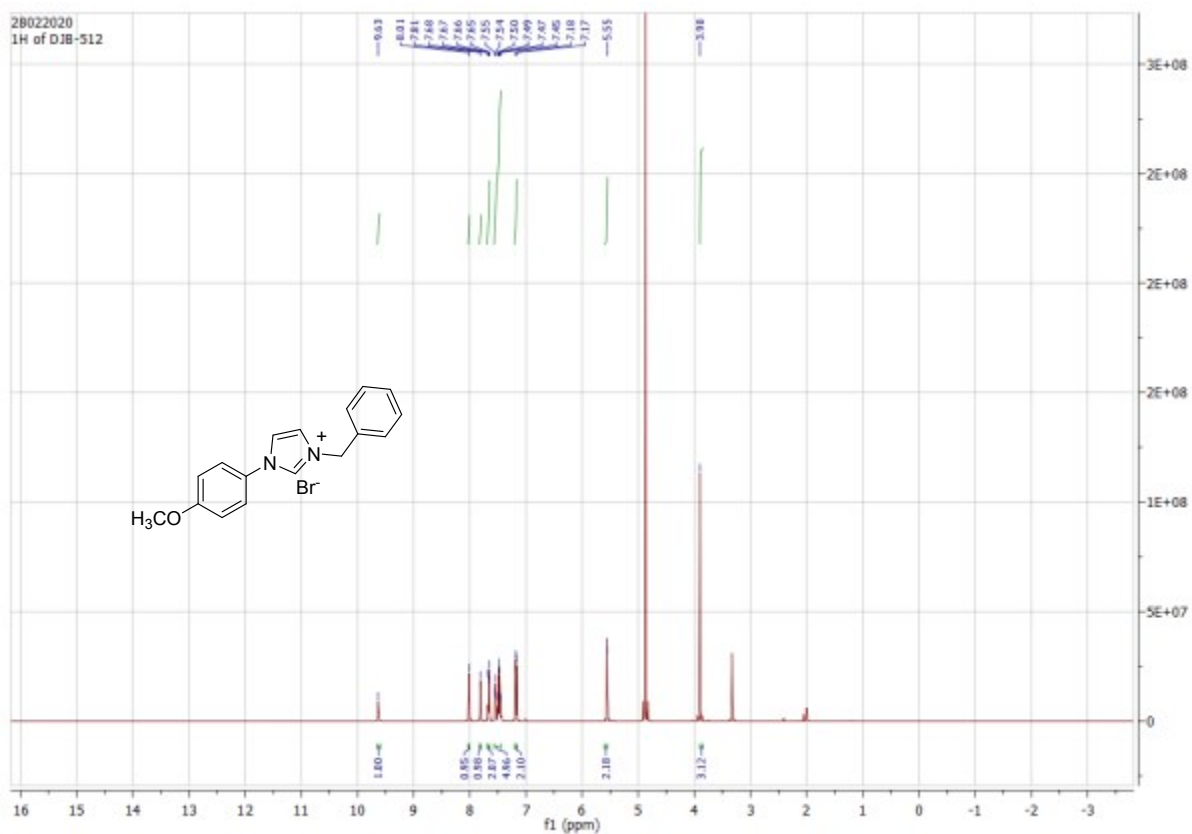

Figure S16.  $^1\text{H}$  NMR of Ligand Precursor  $\text{L}_3$  in  $\text{CD}_3\text{OD-d}_3$

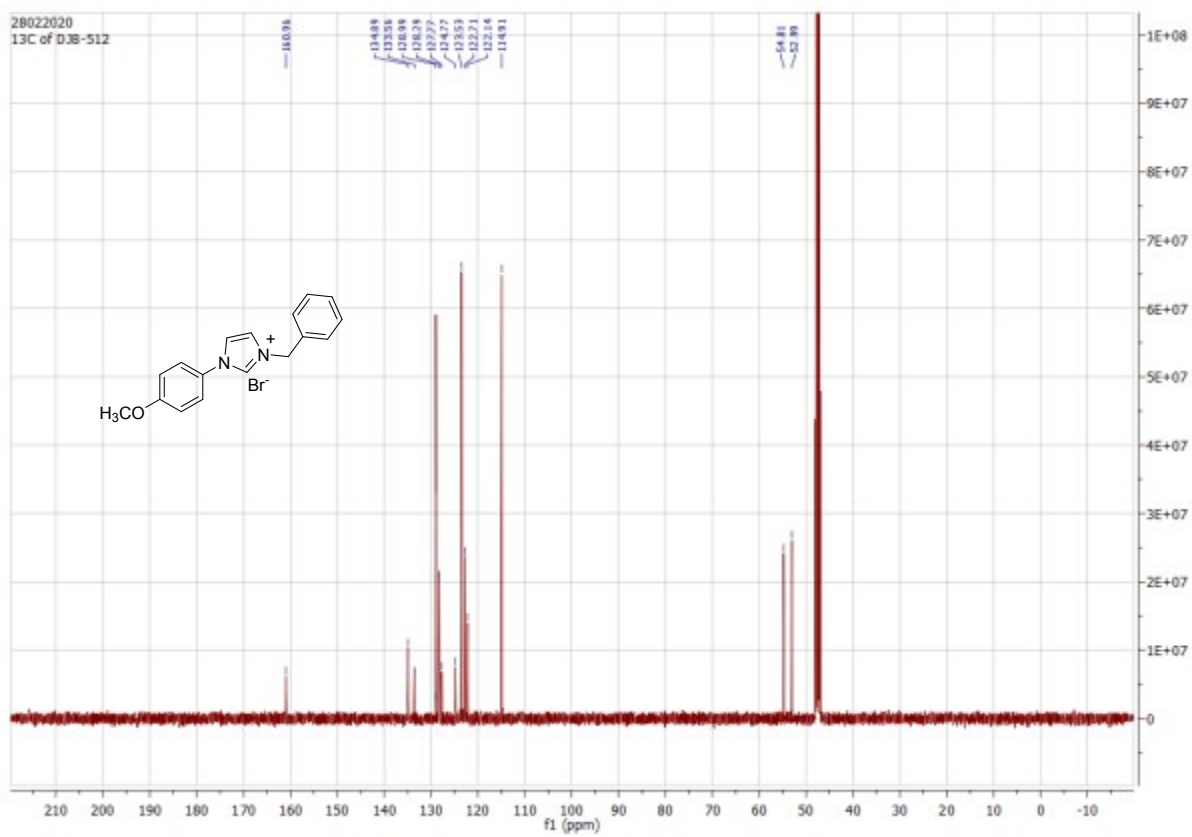

Figure S17. <sup>13</sup>C NMR of Ligand Precursor L<sub>3</sub> in CD<sub>3</sub>OD-d<sub>3</sub>

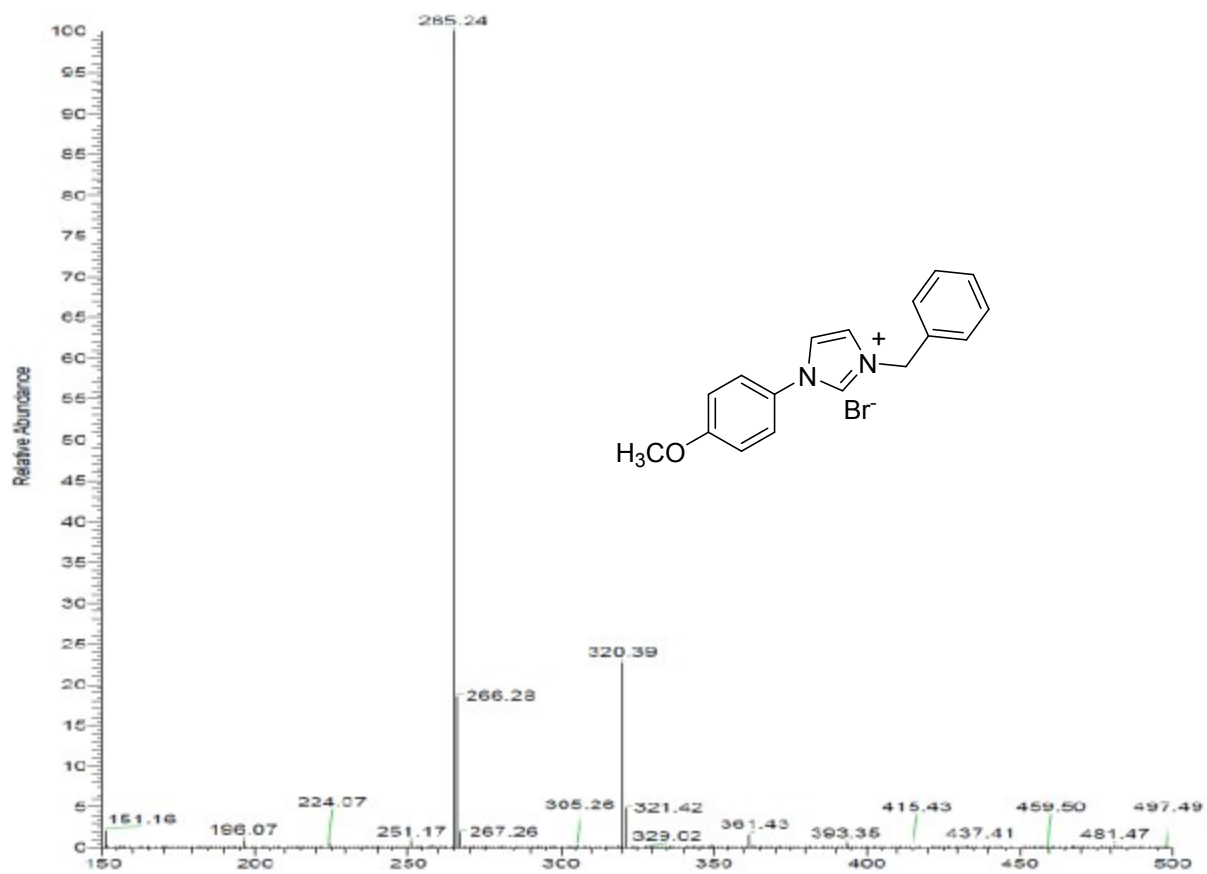

Figure S18. LC-MS spectrum of Ligand Precursor L<sub>3</sub> .

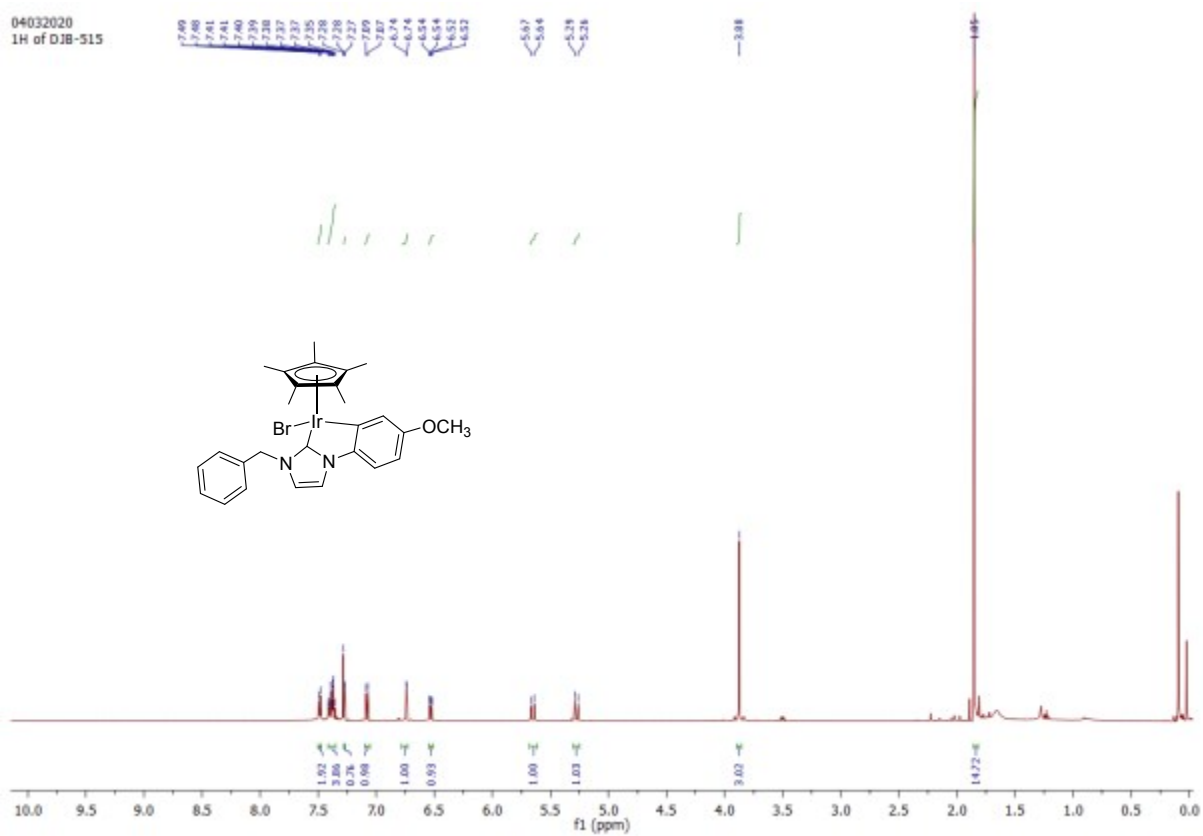Figure S19.  $^1\text{H}$  NMR of Complex 1c in  $\text{CDCl}_3\text{-d}_1$

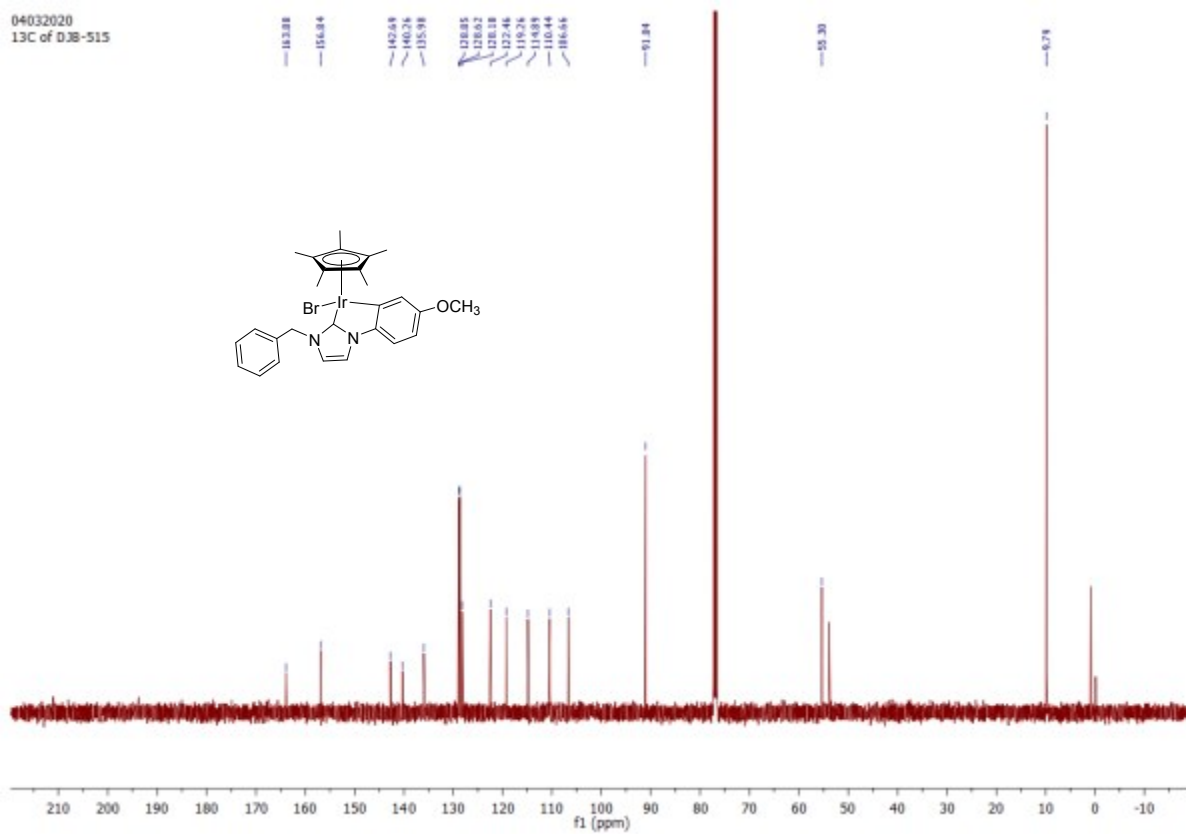

Figure S20.  $^{13}\text{C}$  NMR of Complex 1c in  $\text{CDCl}_3\text{-d}_1$

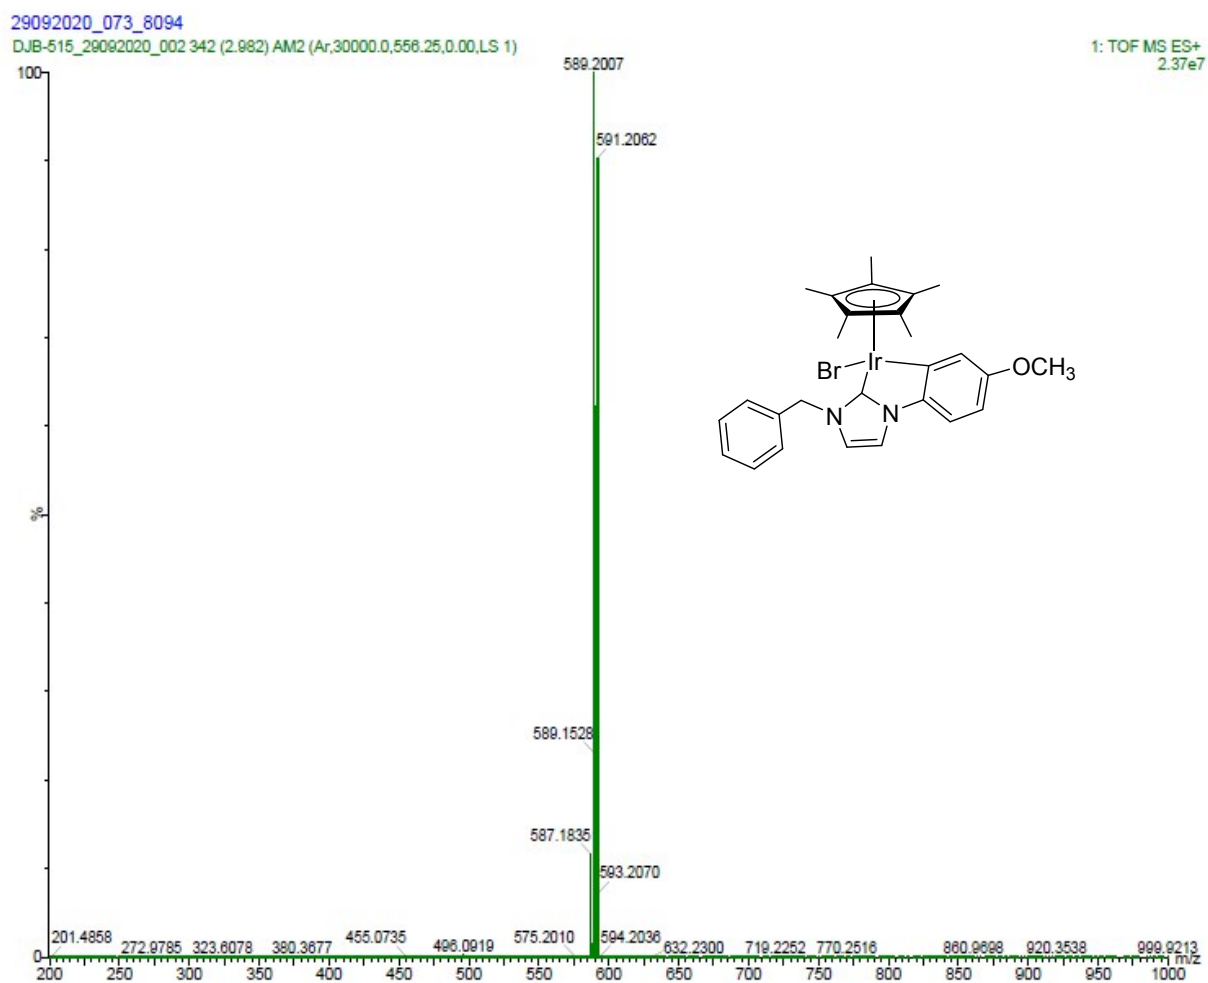

Figure S21. HR-MS spectra of Complex 1c .



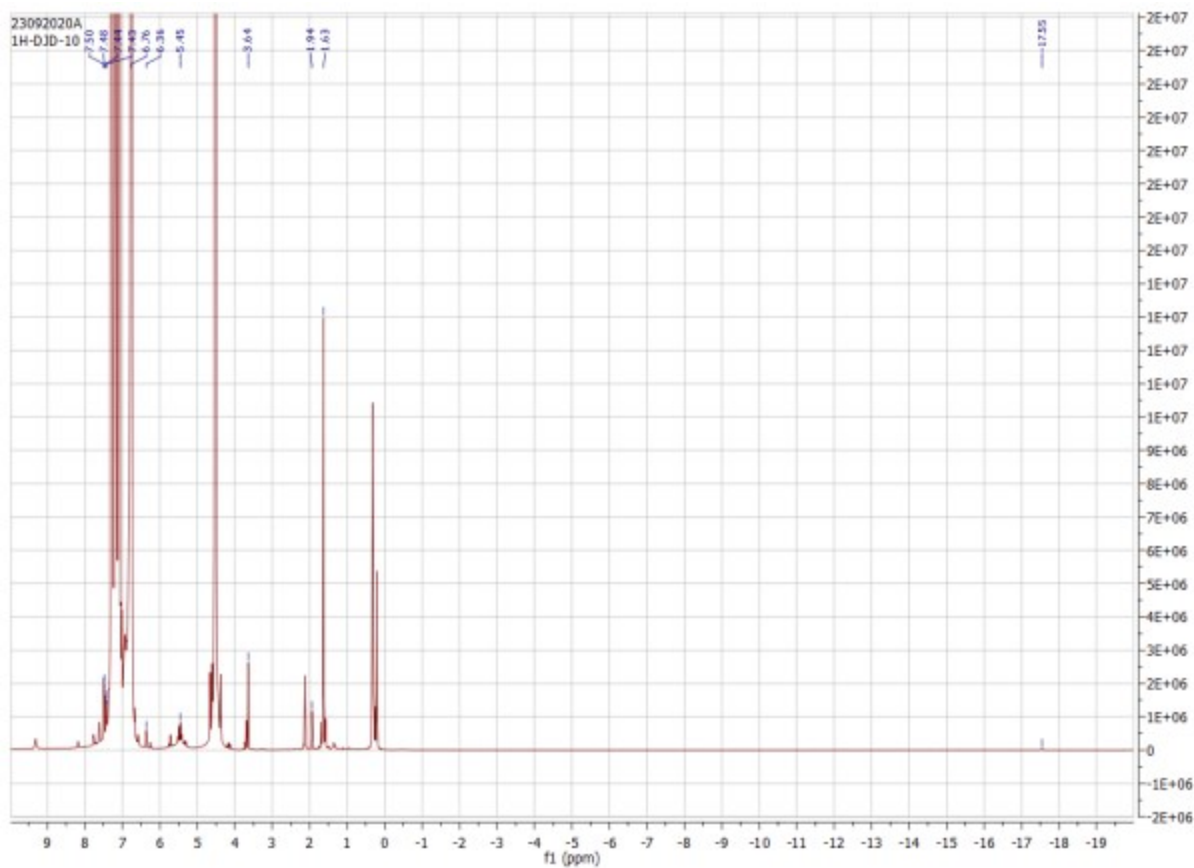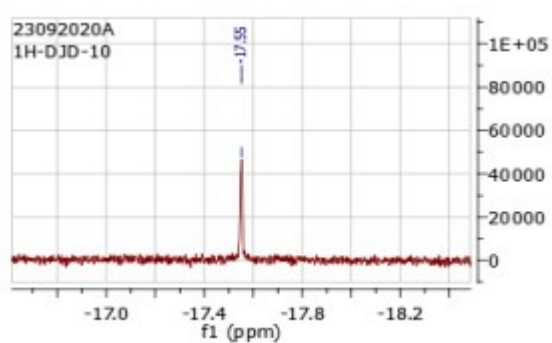

Figure S22 :  $^1\text{H}$  NMR spectrum of *in situ* generated Ir-H from the complex **1a** at  $50^\circ\text{C}$  in toluene  $d_8$ . ( heated for 10 minutes)

(The assigned signals are for the complex)

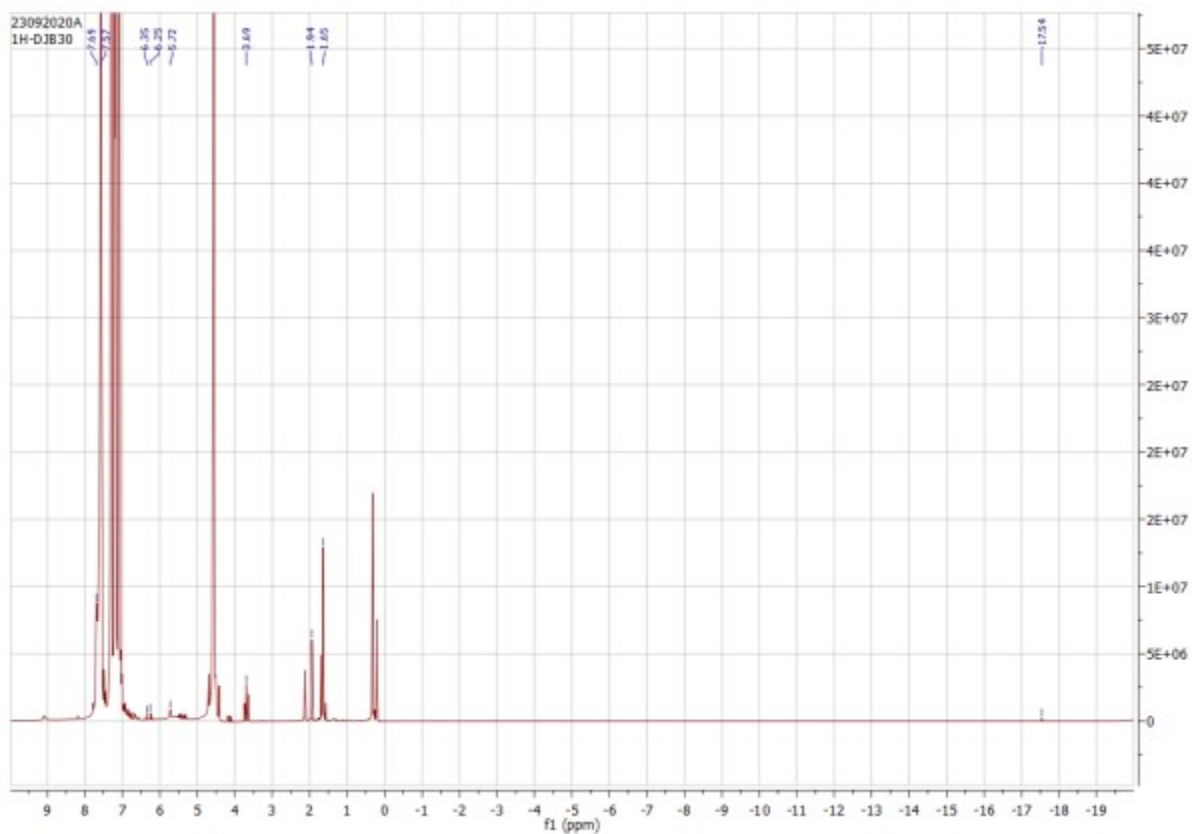

Figure S23 :  $^1\text{H}$  NMR spectrum of *in situ* generated Ir-H from the complex **1a** in **toluene-d8**. ( under standard reaction conditions, heated for 20 minutes)

(The assigned signals are for the complex)

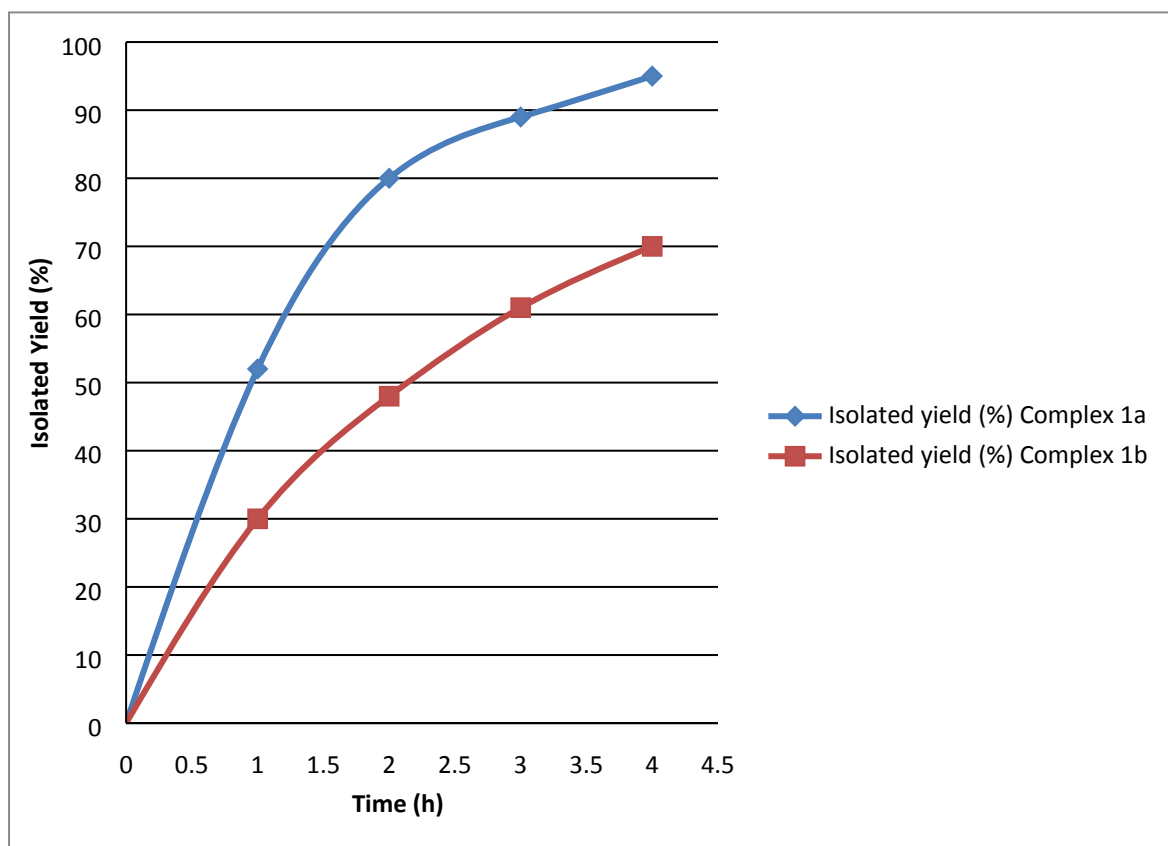

Figure S24: Time course of the catalytic acceptorless dehydrogenation of benzyl alcohol.

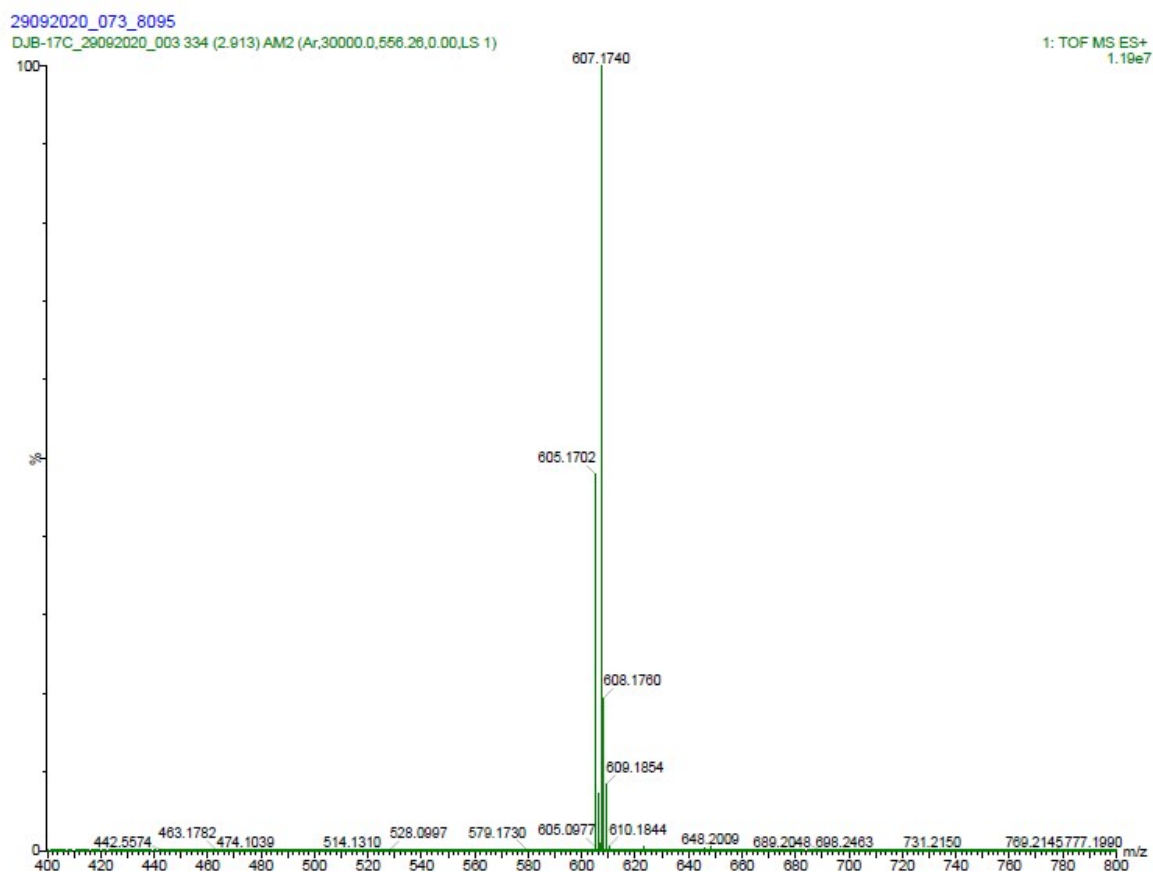

Figure S25: HR-MS spectrum of the reaction mixture of **1b** and KOH in toluene.

Condition : Complex **1b** ( 0.1 mmol), KOH ( 1.1 mmol), Toluene ( 10 mL), Temperature 120°C, Time 24 h

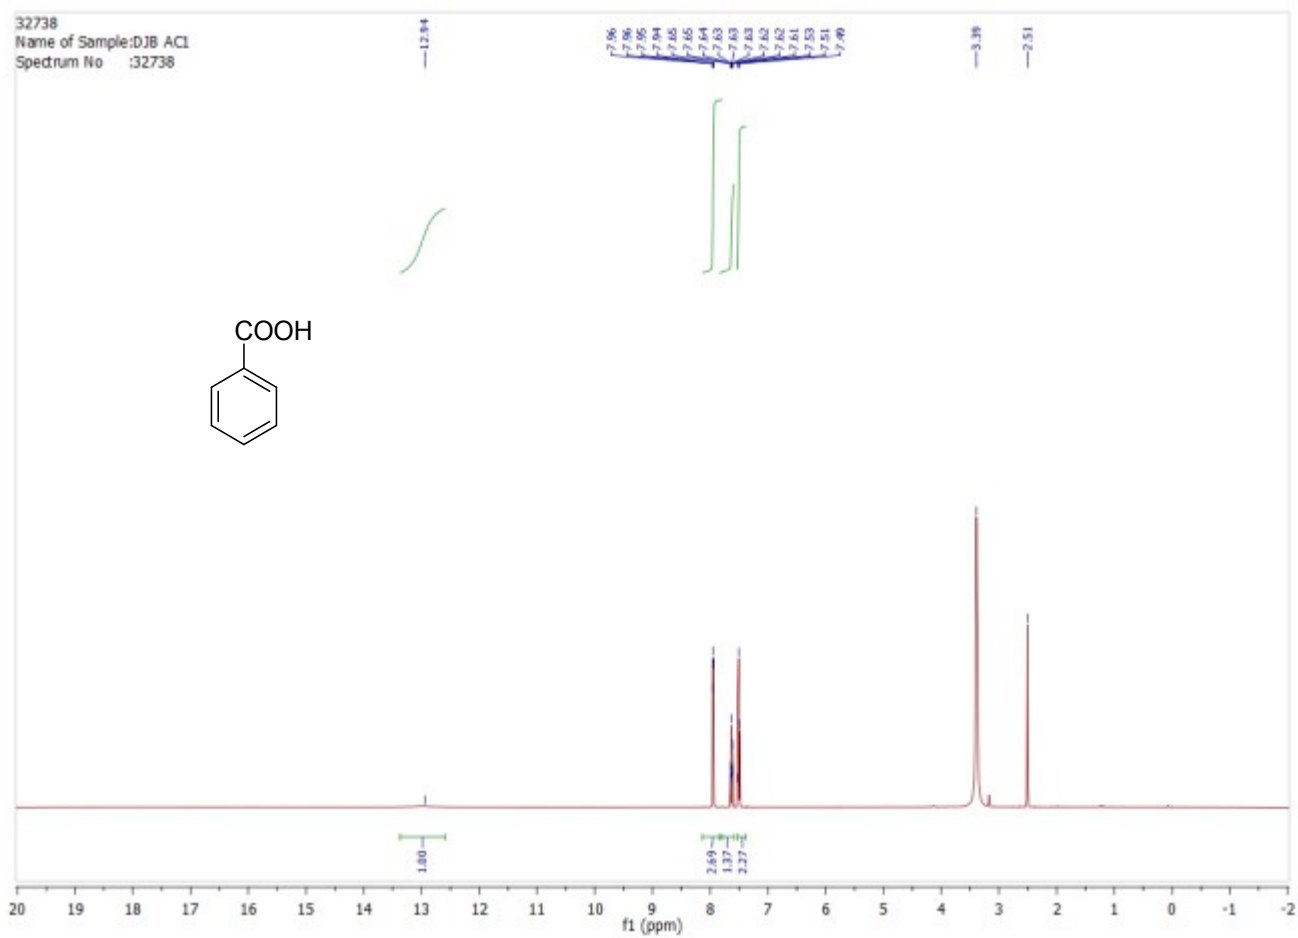

Figure S26.  $^1\text{H}$  NMR of Acid **1** in  $\text{DMSO-d}_6$  ( Table 2, Entry 1)

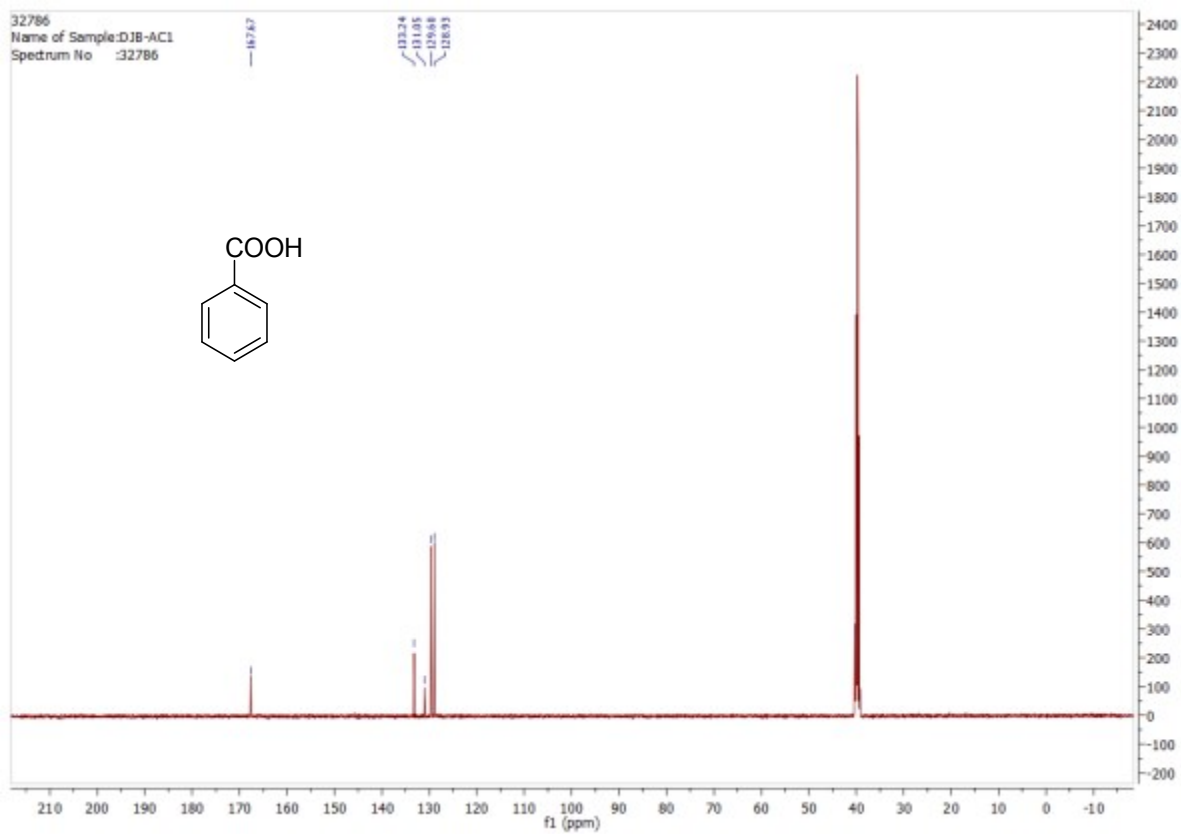

Figure S27.  $^{13}\text{C}$  NMR of Acid 1 in  $\text{DMSO-d}_6$  ( Table 2, Entry 1)

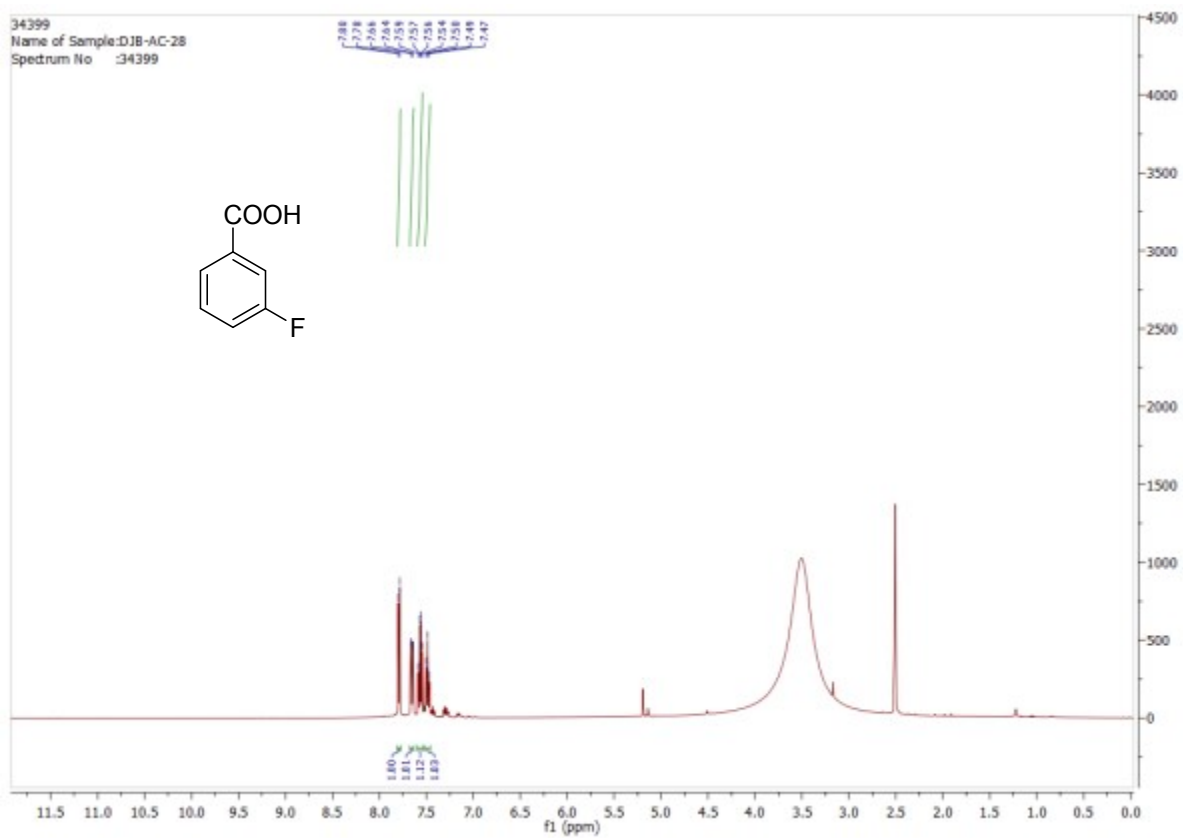

Figure S28.  $^1\text{H}$  NMR of Acid **2** in  $\text{DMSO-d}_6$  ( Table 2, Entry 2)

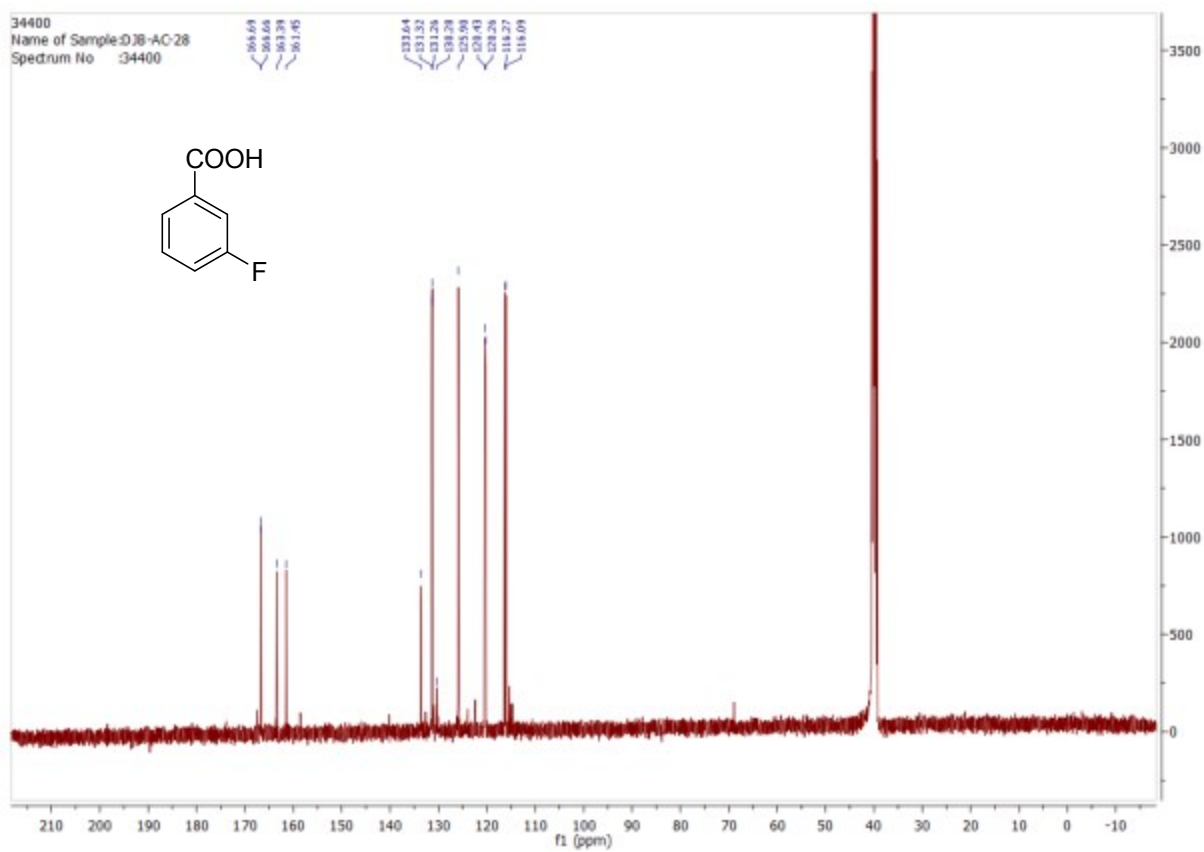

Figure S29.  $^{13}\text{C}$  NMR of Acid 2 in  $\text{DMSO-d}_6$  ( Table 2, Entry 2)



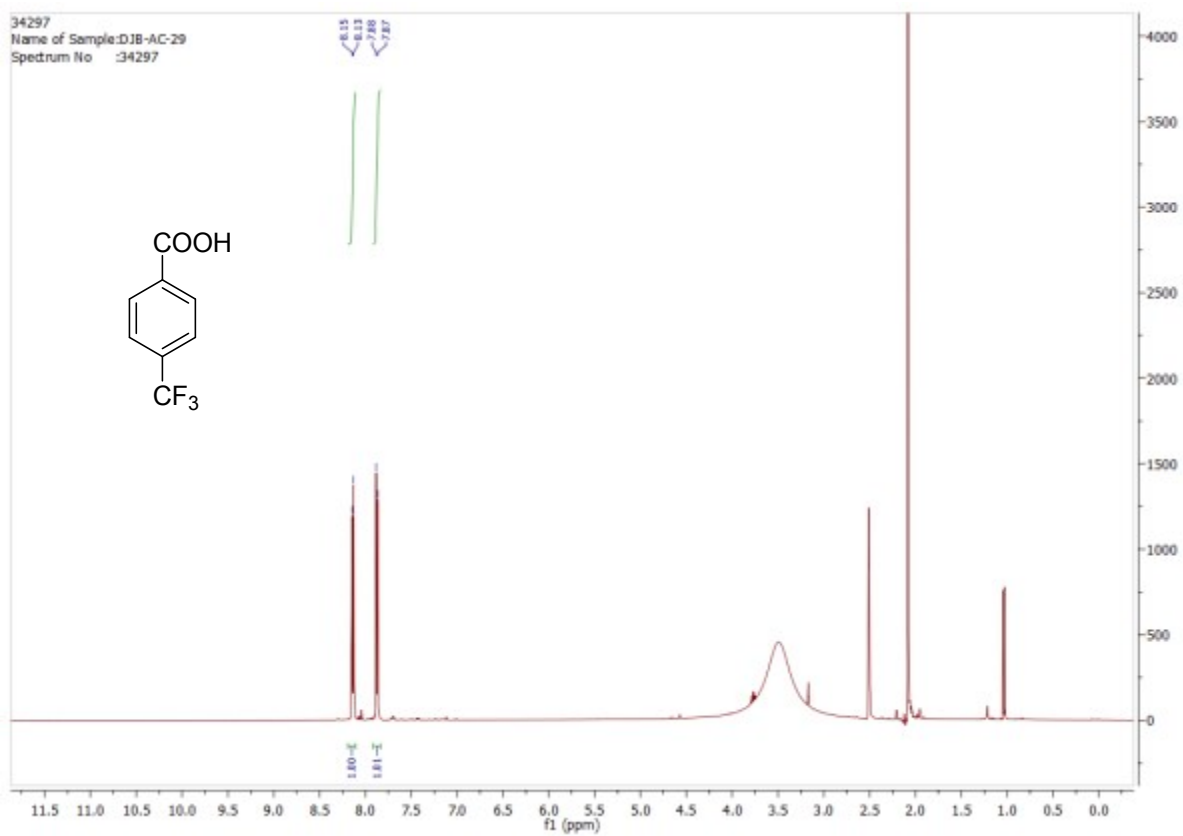

Figure S30.  $^1\text{H}$  NMR of Acid **3** in  $\text{DMSO-d}_6$  (Table 2, Entry 3)

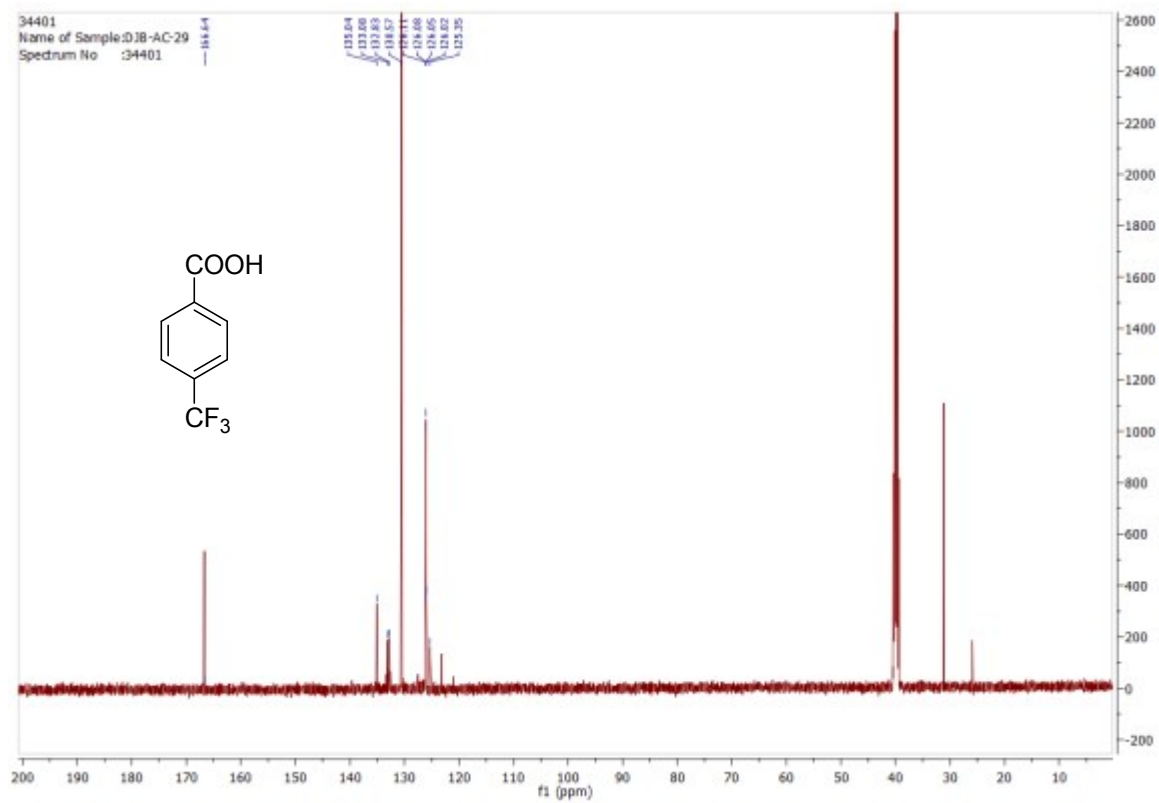

Figure S31.  $^{13}\text{C}$  NMR of Acid **3** in  $\text{DMSO-d}_6$  ( Table 2, Entry 3)

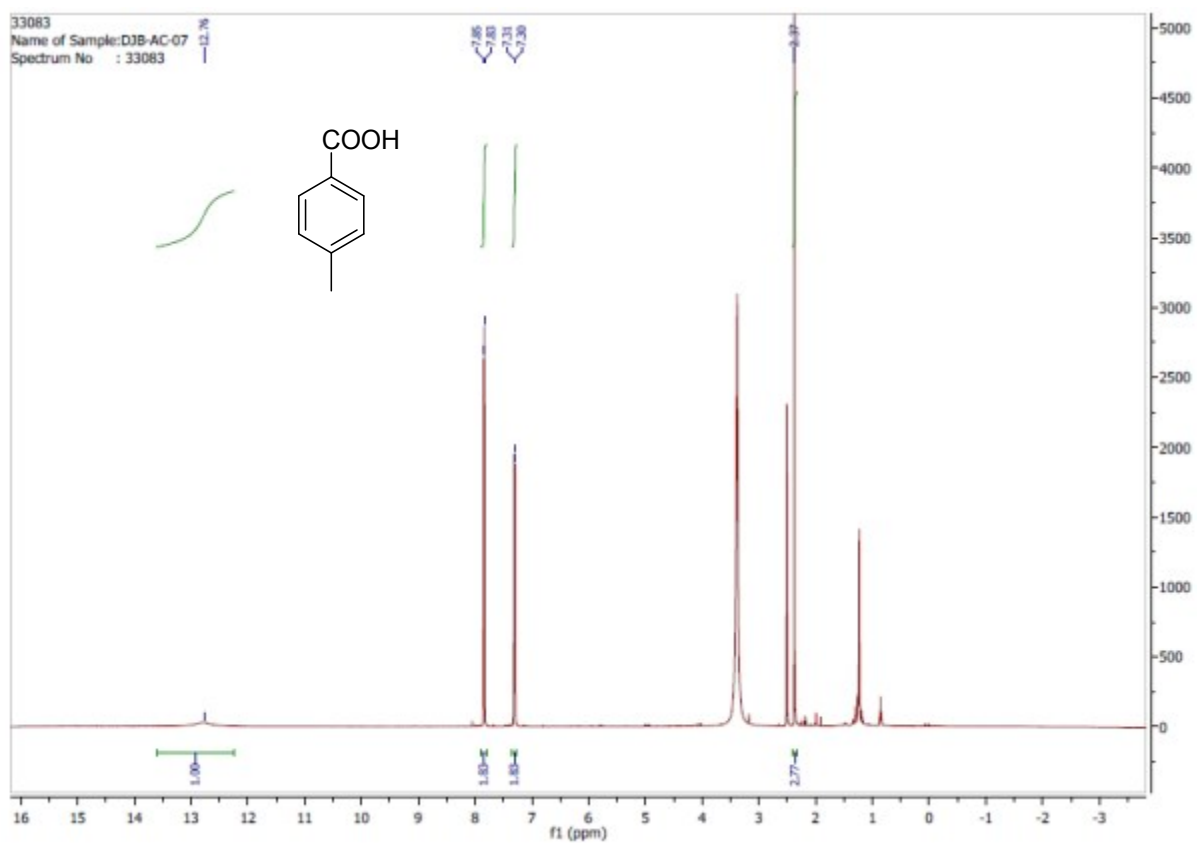

Figure S32.  $^1\text{H}$  NMR of Acid 4 in  $\text{DMSO-d}_6$  (Table 2, Entry 4)

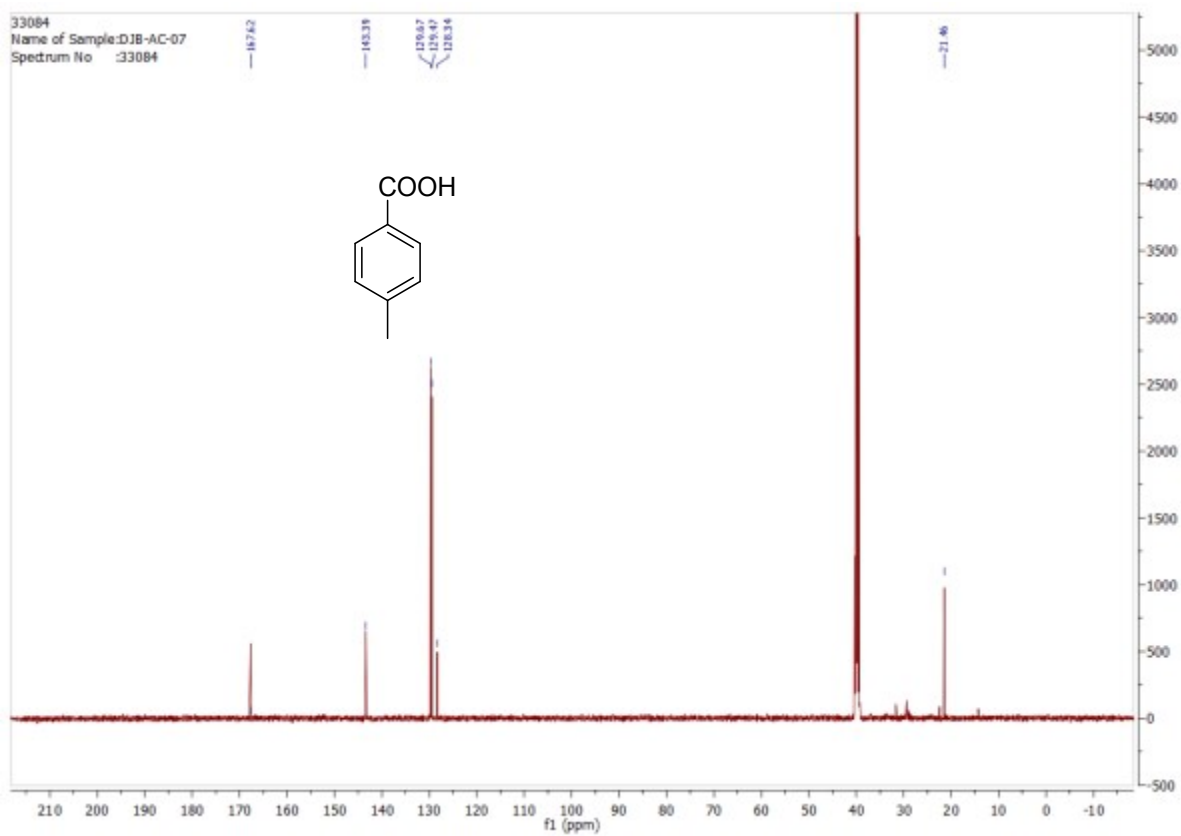

Figure S33.  $^{13}\text{C}$  NMR of Acid 4 in  $\text{DMSO-d}_6$  (Table 2, Entry 4)

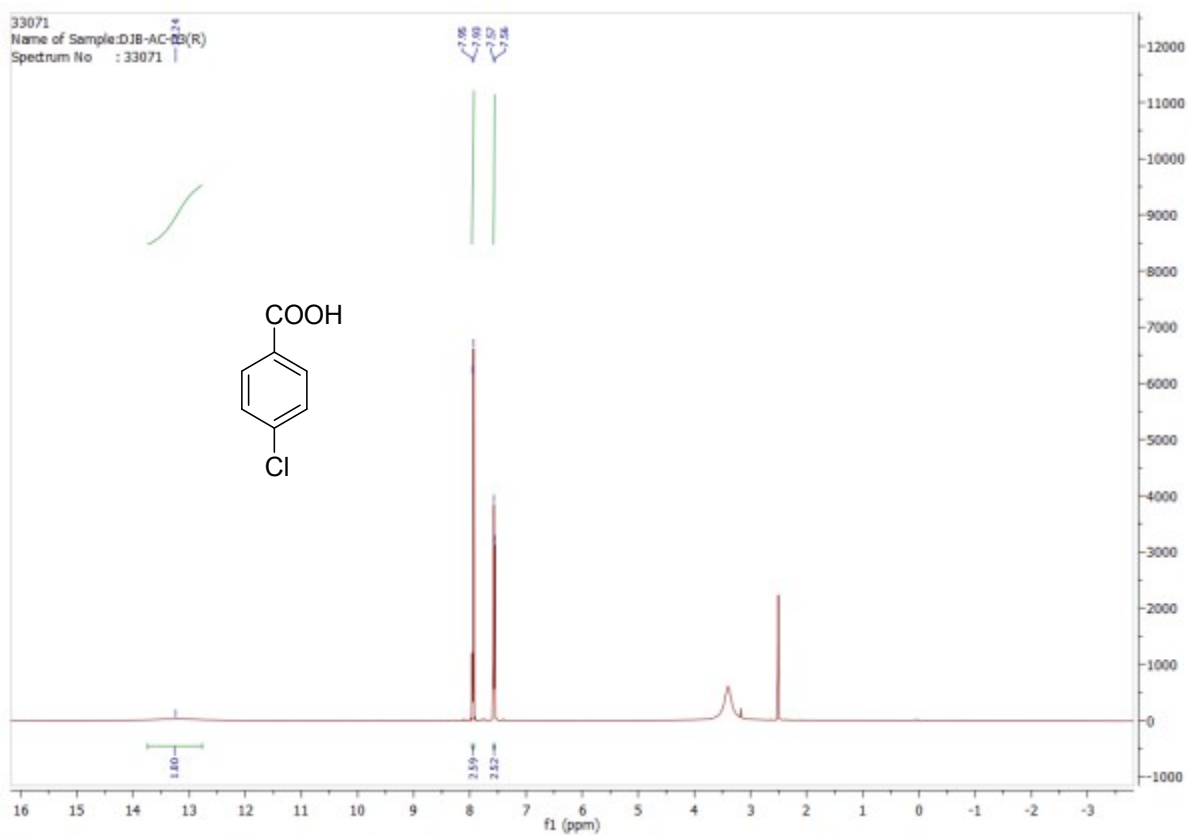

Figure S34.  $^1\text{H}$  NMR of Acid **5** in  $\text{DMSO-d}_6$  (Table 2, Entry 5)

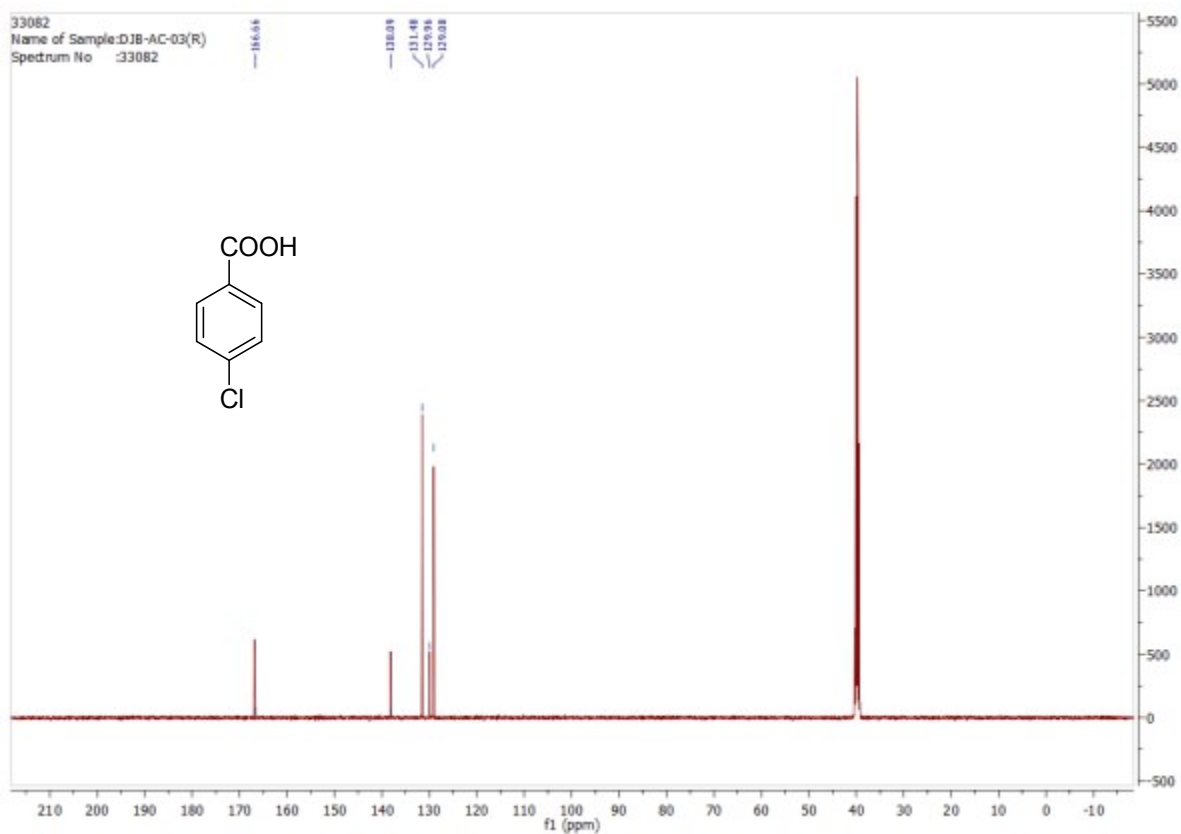

Figure S35.  $^{13}\text{C}$  NMR of Acid 5 in  $\text{DMSO-d}_6$  (Table 2, Entry 5)

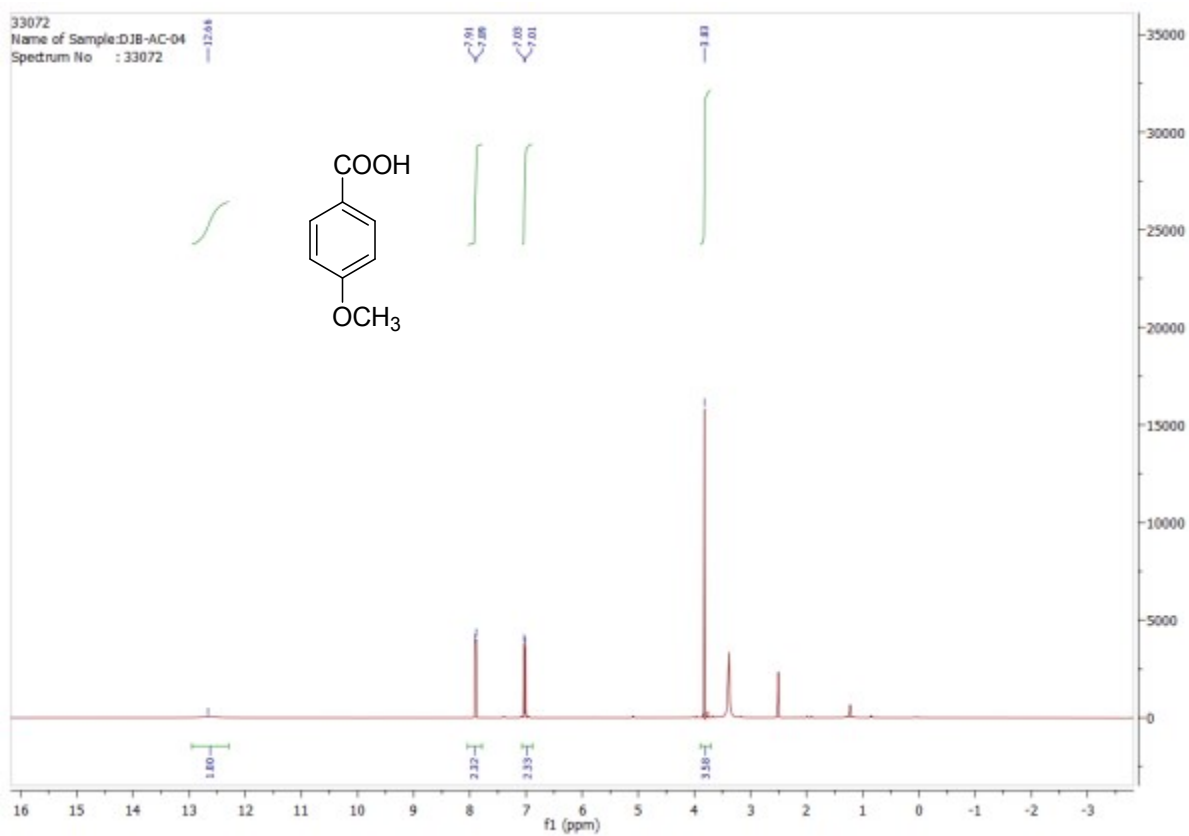

Figure S36. <sup>1</sup>H NMR of Acid **6** in DMSO-d<sub>6</sub> ( Table 2, Entry 6)

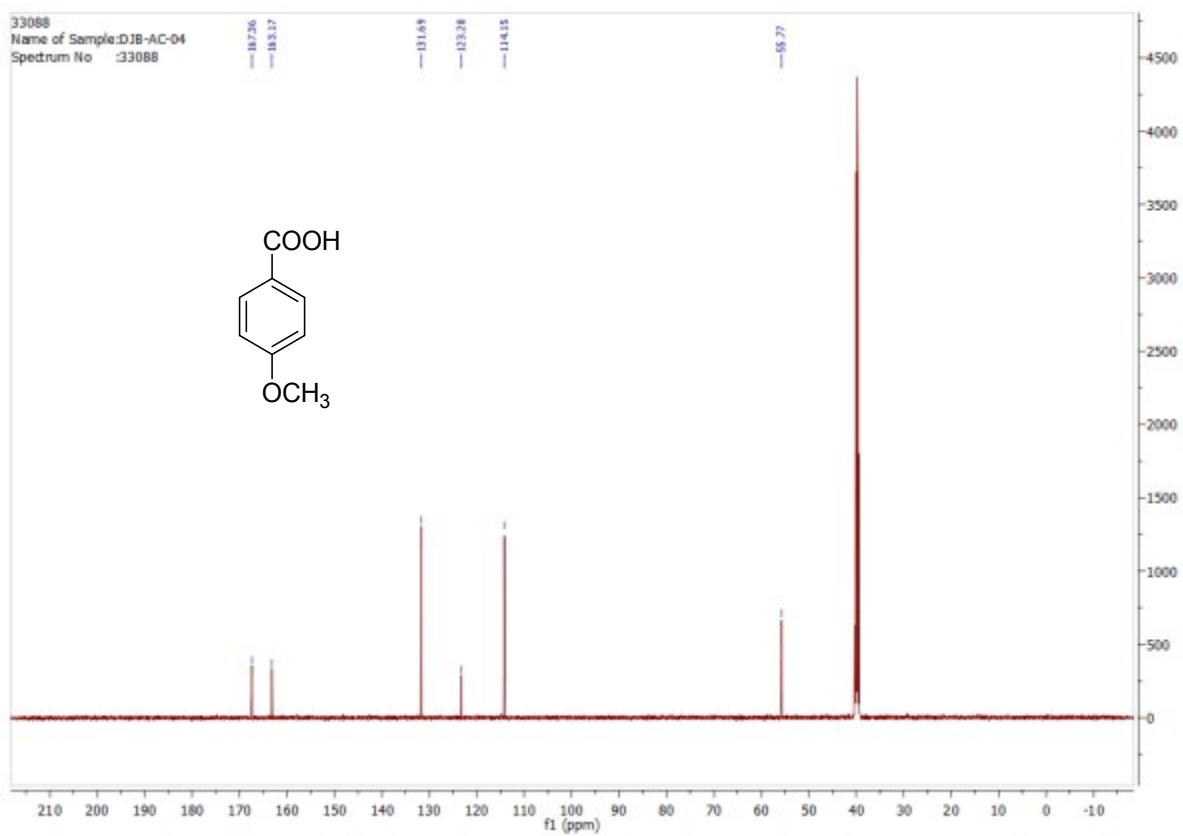

Figure S37.  $^{13}\text{C}$  NMR of Acid 6 in  $\text{DMSO-d}_6$  (Table 2, Entry 6)



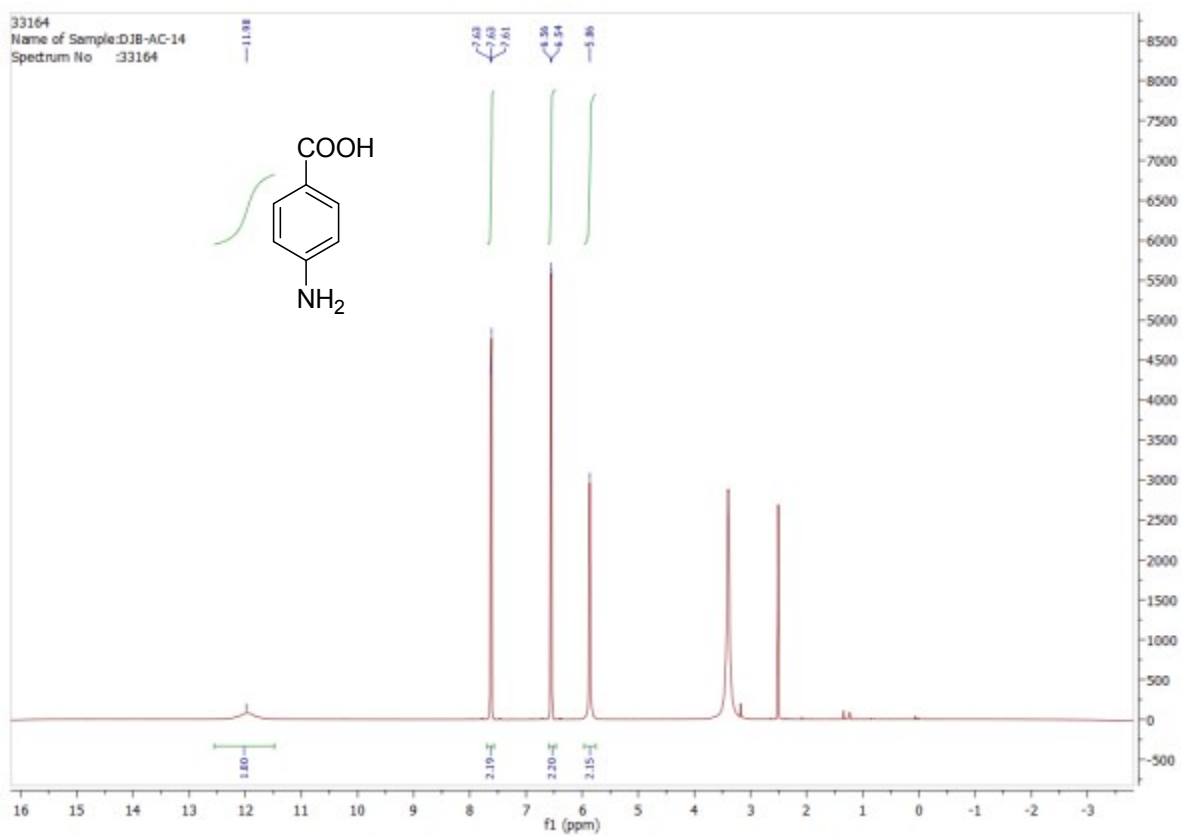

Figure S38. <sup>1</sup>H NMR Spectra of Acid 7 in DMSO-d<sub>6</sub> (Table 2, Entry 7)

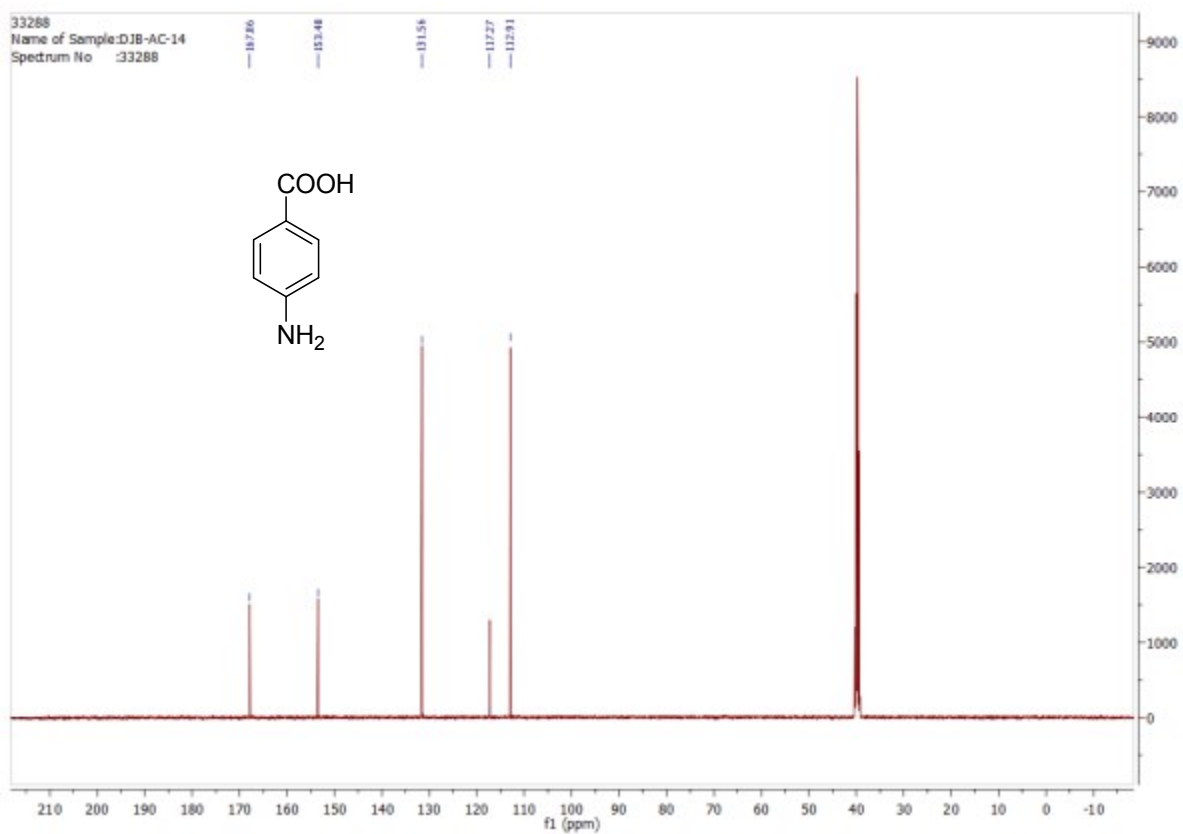

Figure S39.  $^{13}\text{C}$  NMR of Acid 7 in  $\text{DMSO-d}_6$  (Table 2, Entry 7)

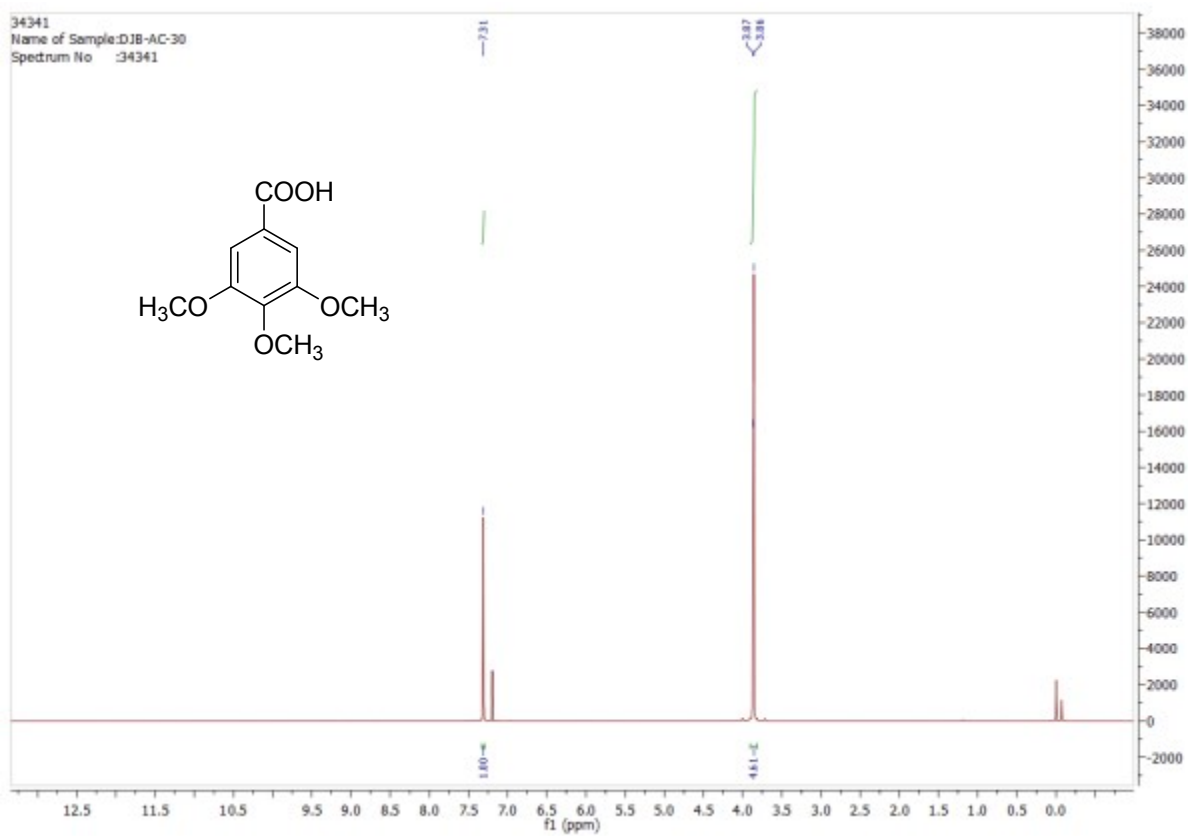

Figure S40.  $^1\text{H}$  NMR of Acid **8** in  $\text{DMSO-d}_6$  (Table 2, Entry 8)

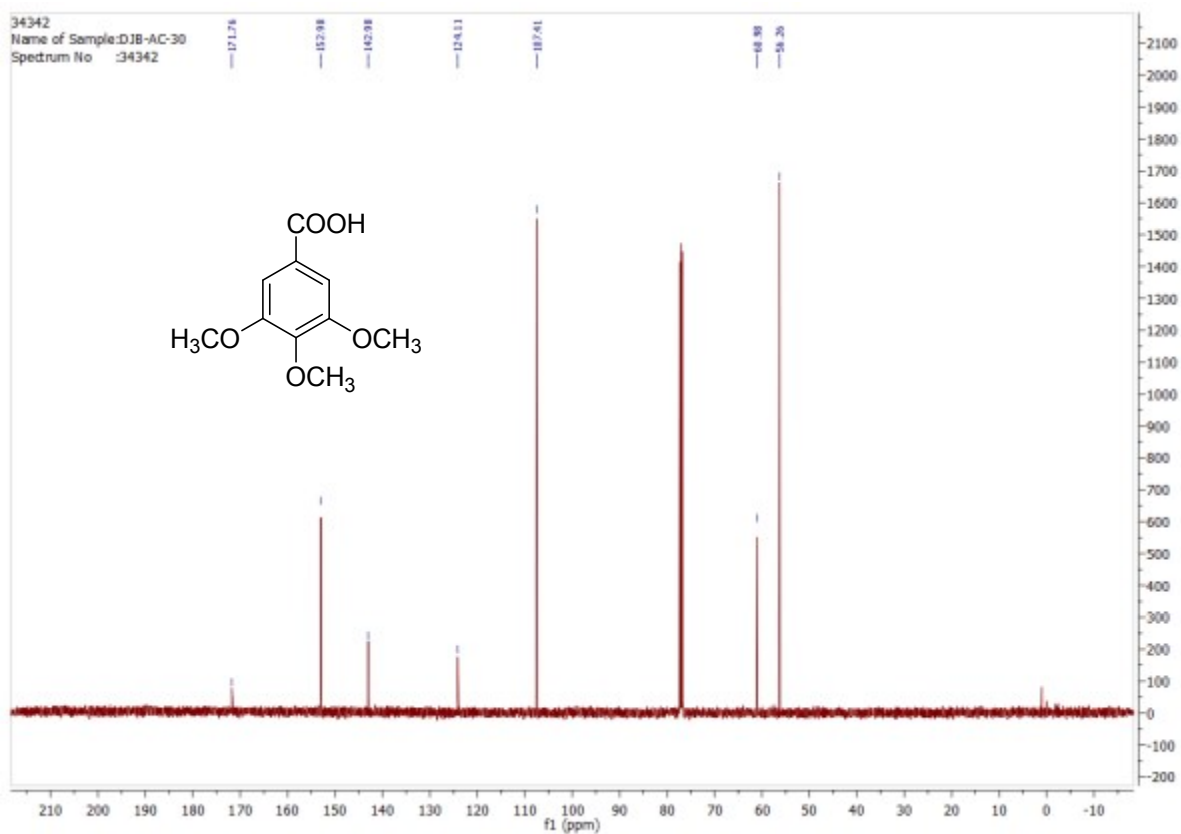

Figure S41.  $^{13}\text{C}$  NMR of Acid **8** in  $\text{DMSO-d}_6$  (Table 2, Entry 8)

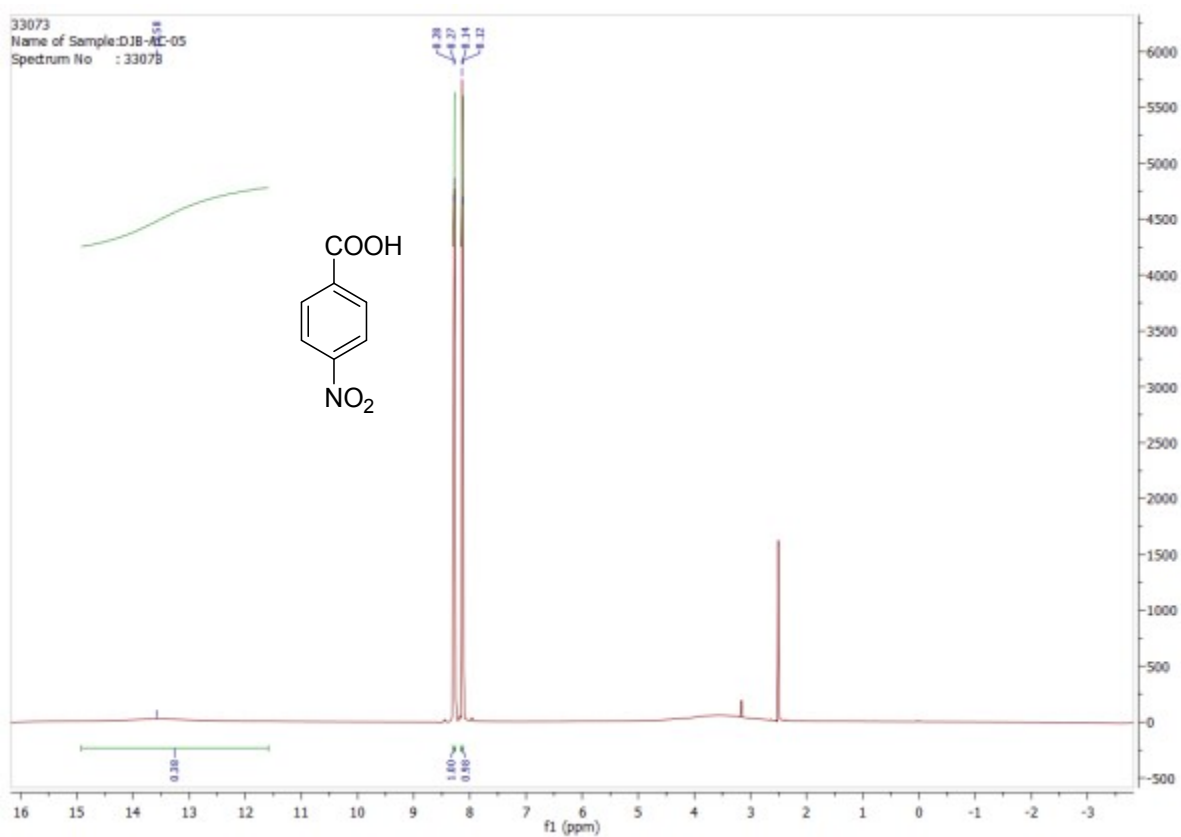

Figure S42. <sup>1</sup>H NMR of Acid **9** in DMSO-d<sub>6</sub> (Table 2, Entry 9)

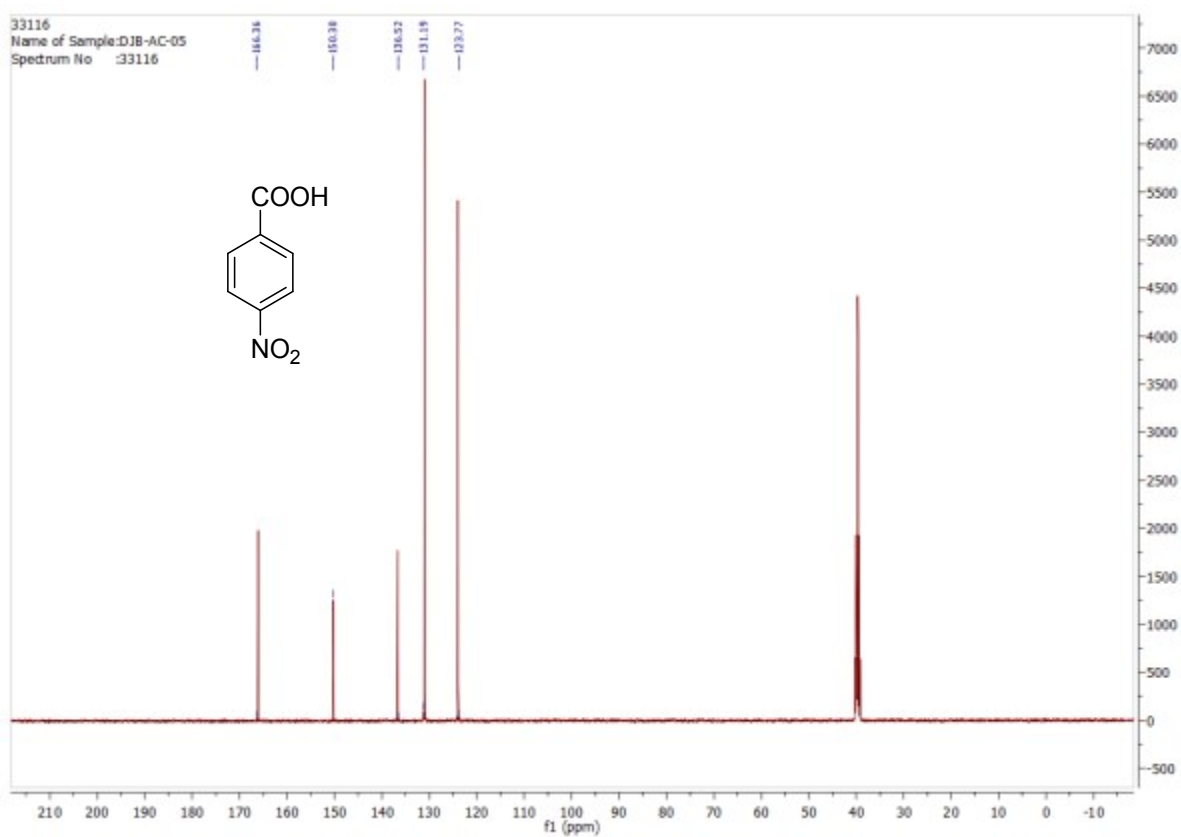

Figure S43.  $^{13}\text{C}$  NMR of Acid 9 in  $\text{DMSO-d}_6$  (Table 2, Entry 9)

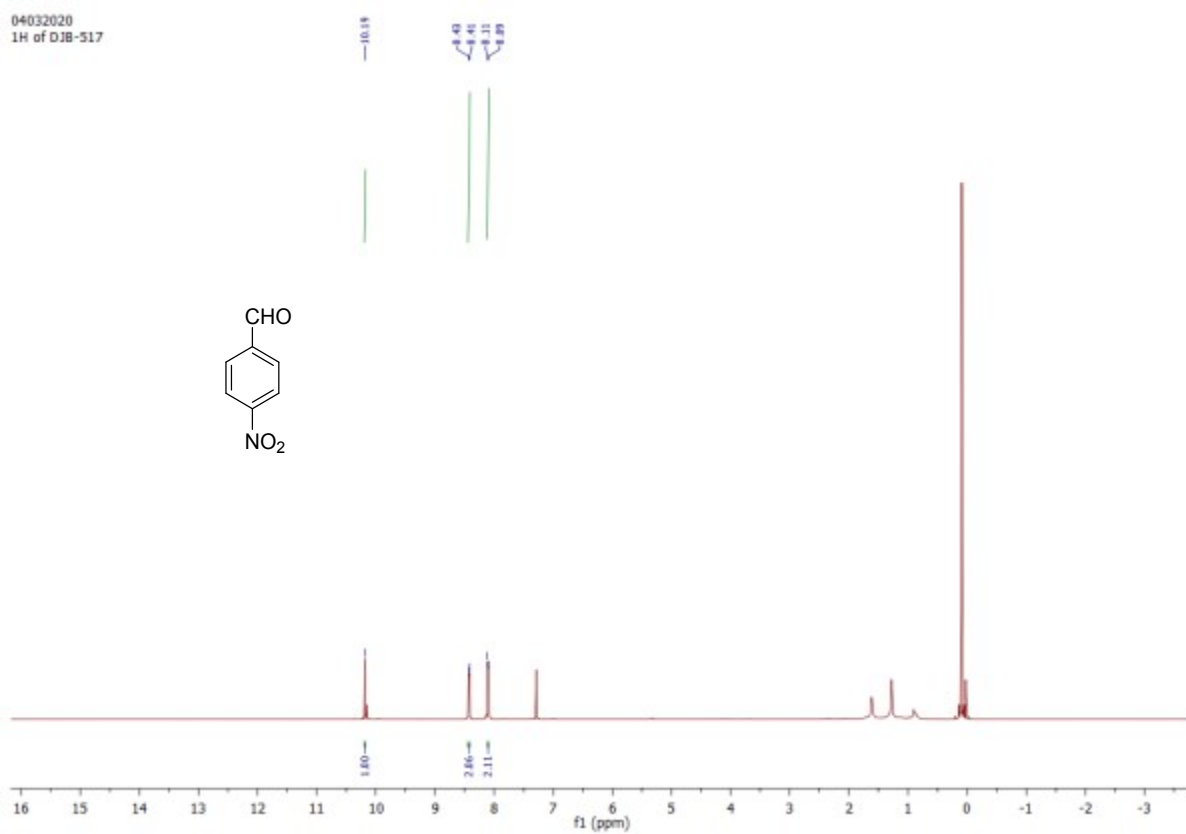

Figure S44.  $^1\text{H}$  NMR of 4-Nitrobenzaldehyde (9a) in  $\text{CDCl}_3\text{-d}_1$ .

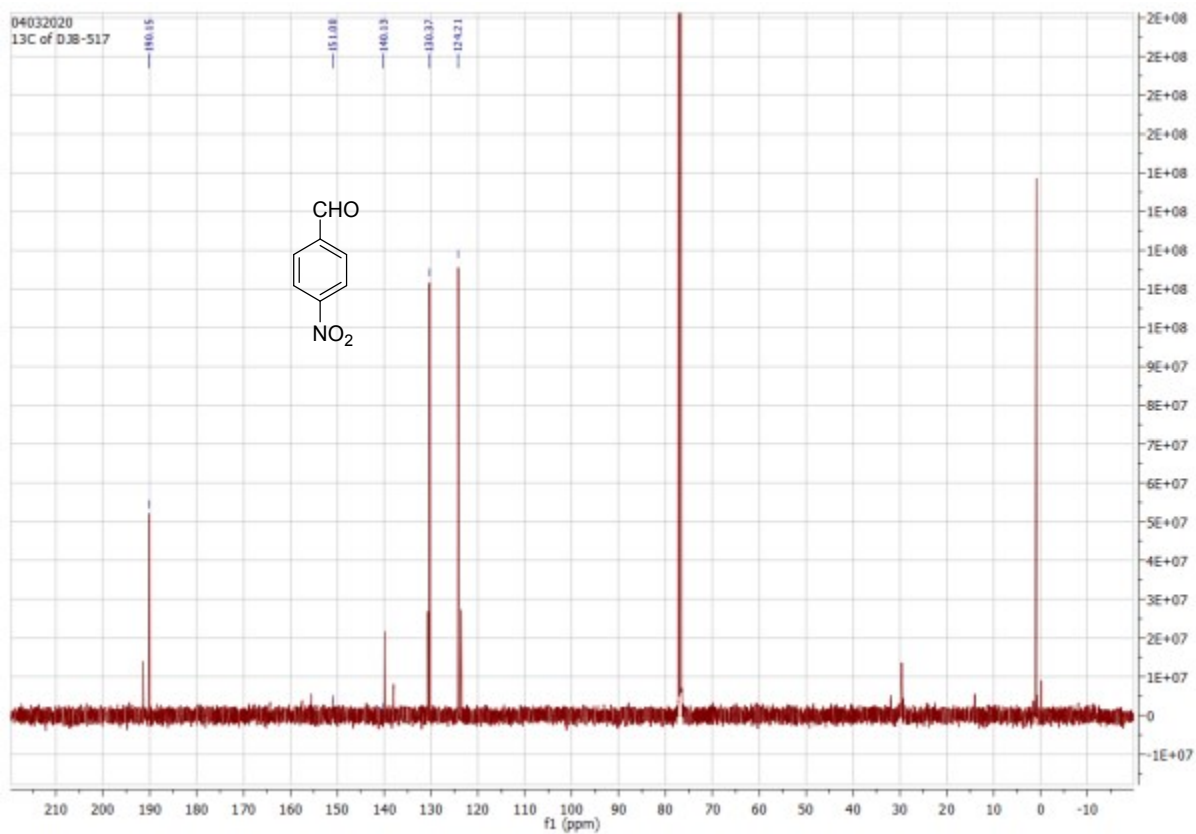

Figure S45.  $^{13}\text{C}$  NMR of of 4-Nitrobenzaldehyde (9a) in  $\text{CDCl}_3\text{-d}_1$



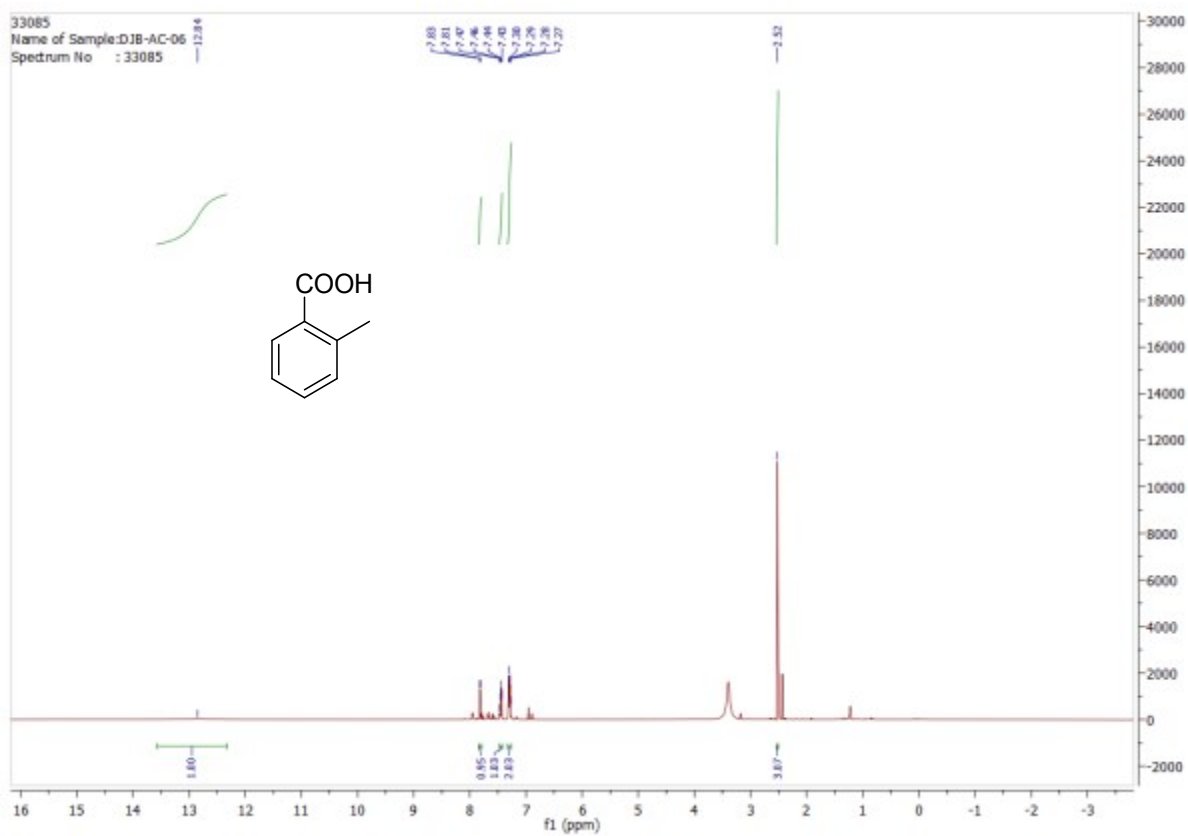

Figure S46.  $^1\text{H}$  NMR of Acid **10** in  $\text{DMSO-d}_6$  (Table 2, Entry 10)

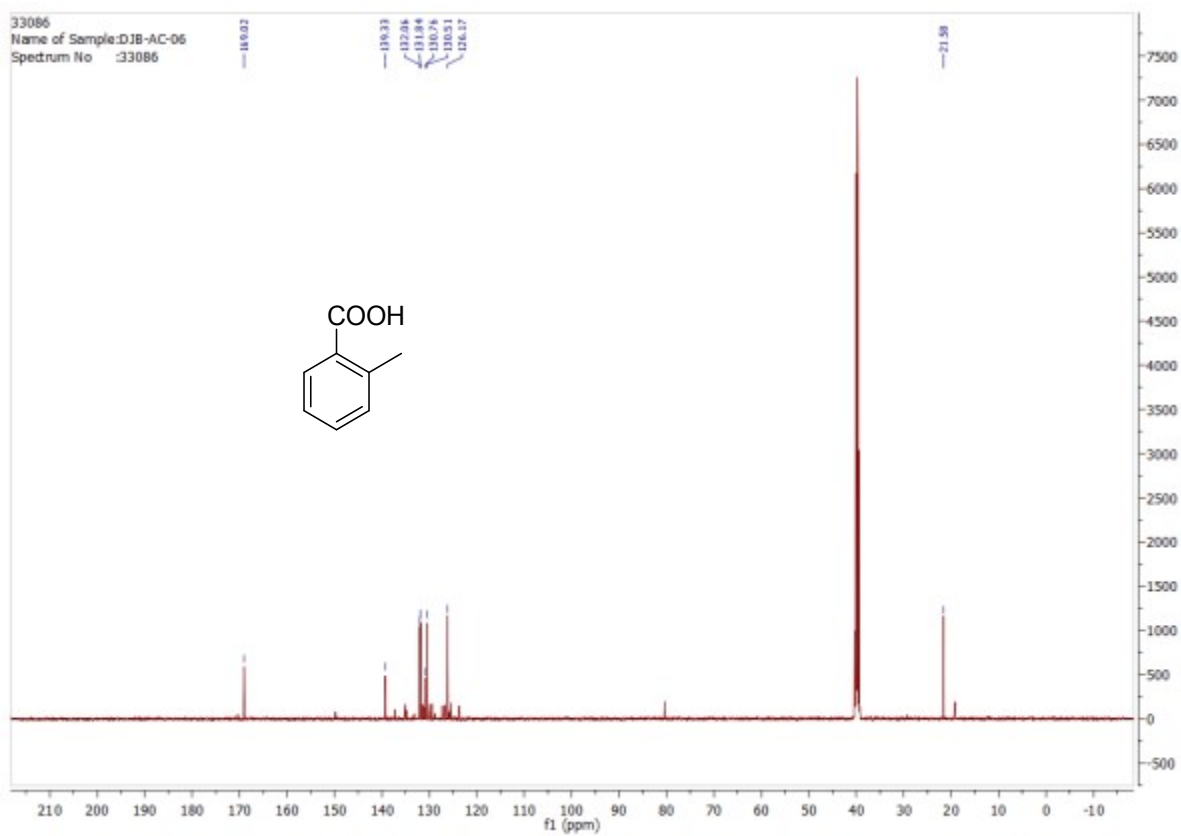

Figure S47.  $^{13}\text{C}$  NMR of Acid **10** in  $\text{DMSO-d}_6$  (Table 2, Entry 10)

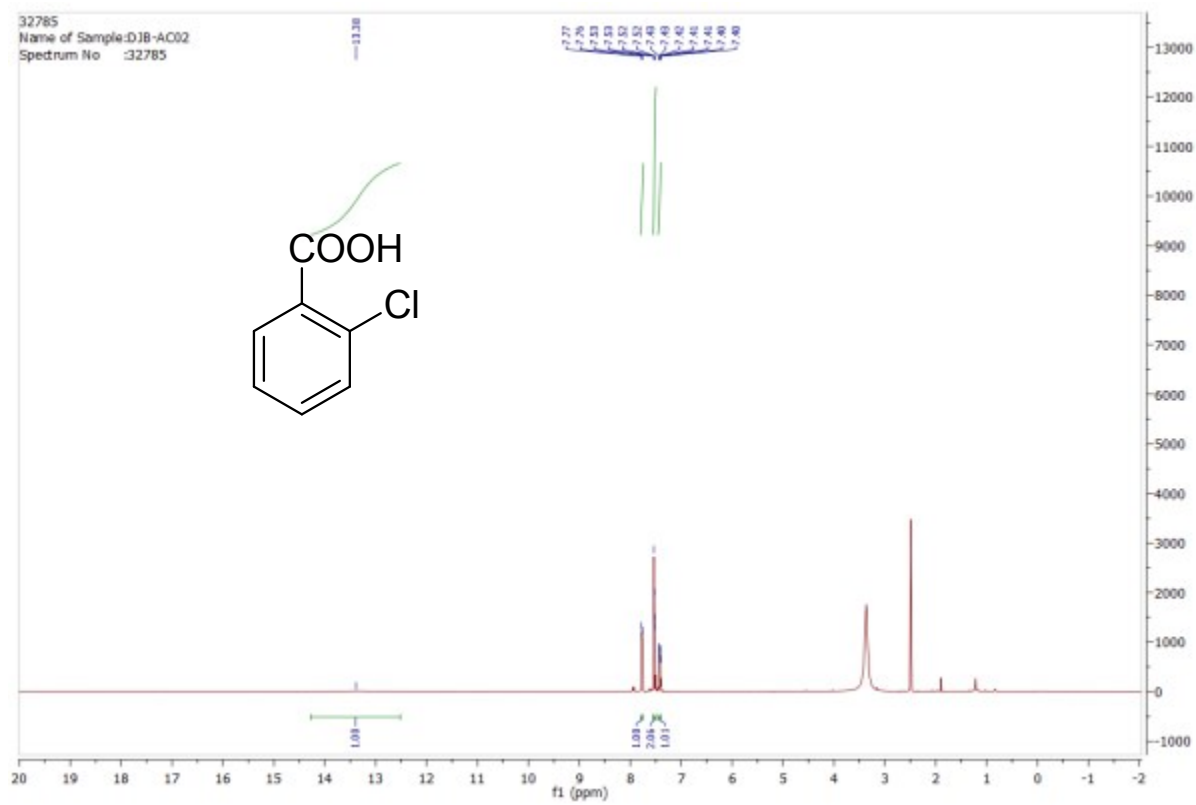

Figure S48.  $^1\text{H}$  NMR of Acid **11** in  $\text{DMSO-d}_6$  (Table 2, Entry 11)

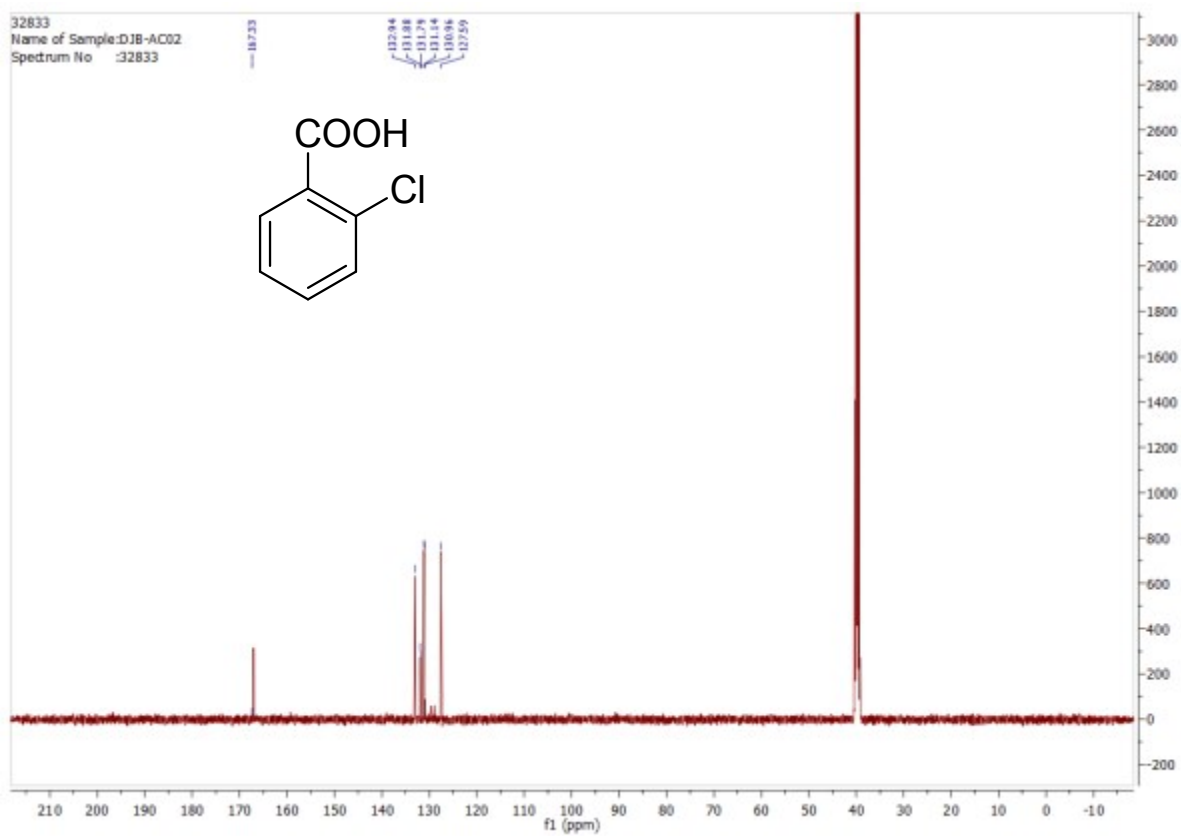

Figure S49.  $^{13}\text{C}$  NMR of Acid **11** in  $\text{DMSO-d}_6$  (Table 2, Entry 11)

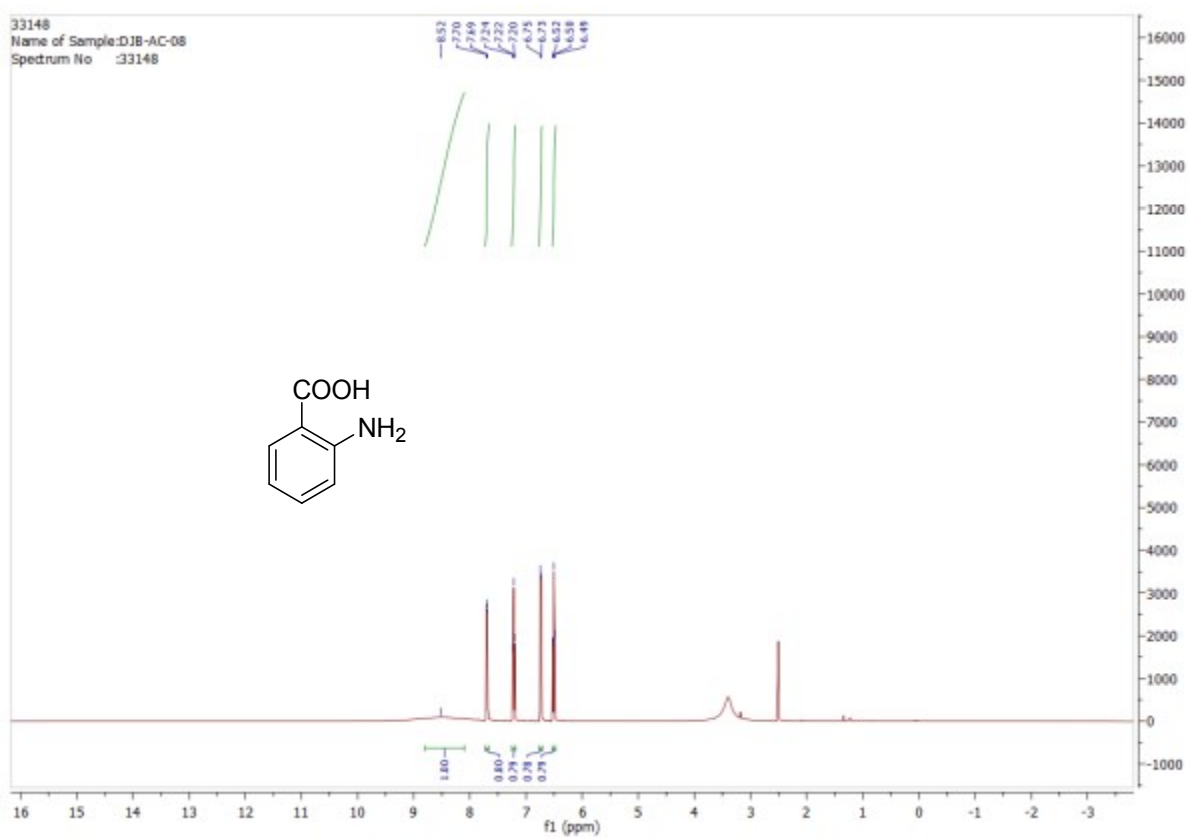

Figure S50.  $^1\text{H}$  NMR of Acid **12** in  $\text{DMSO-d}_6$  (Table 2, Entry 12)

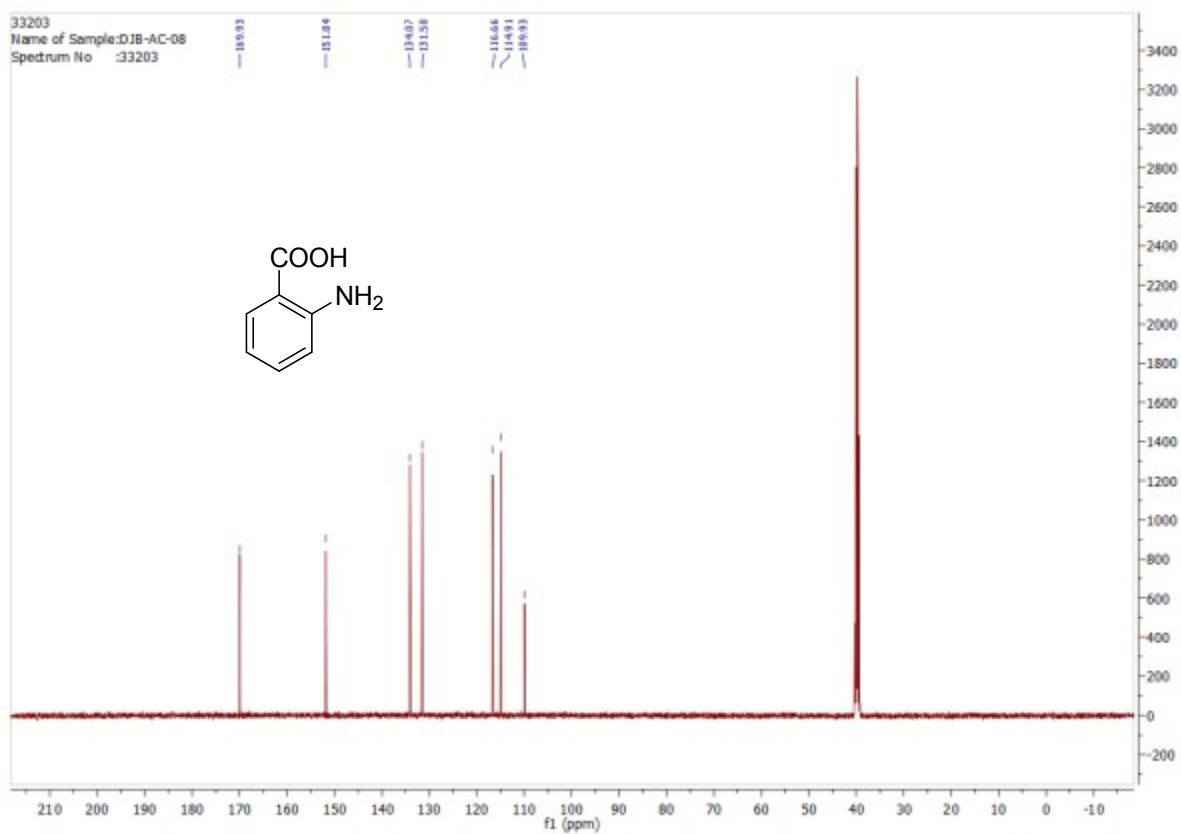

Figure S51.  $^{13}\text{C}$  NMR of Acid 12 in  $\text{DMSO-d}_6$  (Table 2, Entry 12)



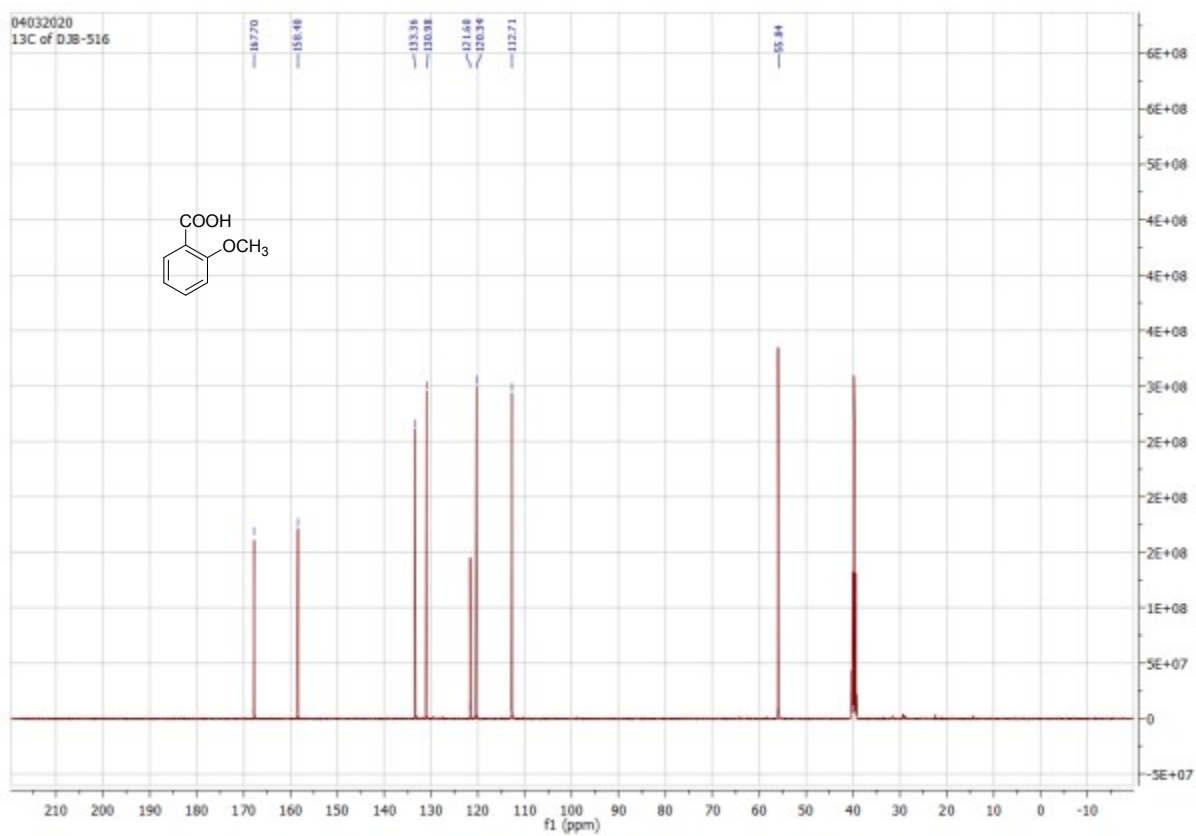

Figure S53.  $^{13}\text{C}$  NMR of Acid **13** in  $\text{DMSO-d}_6$  (Table 2, Entry 13)



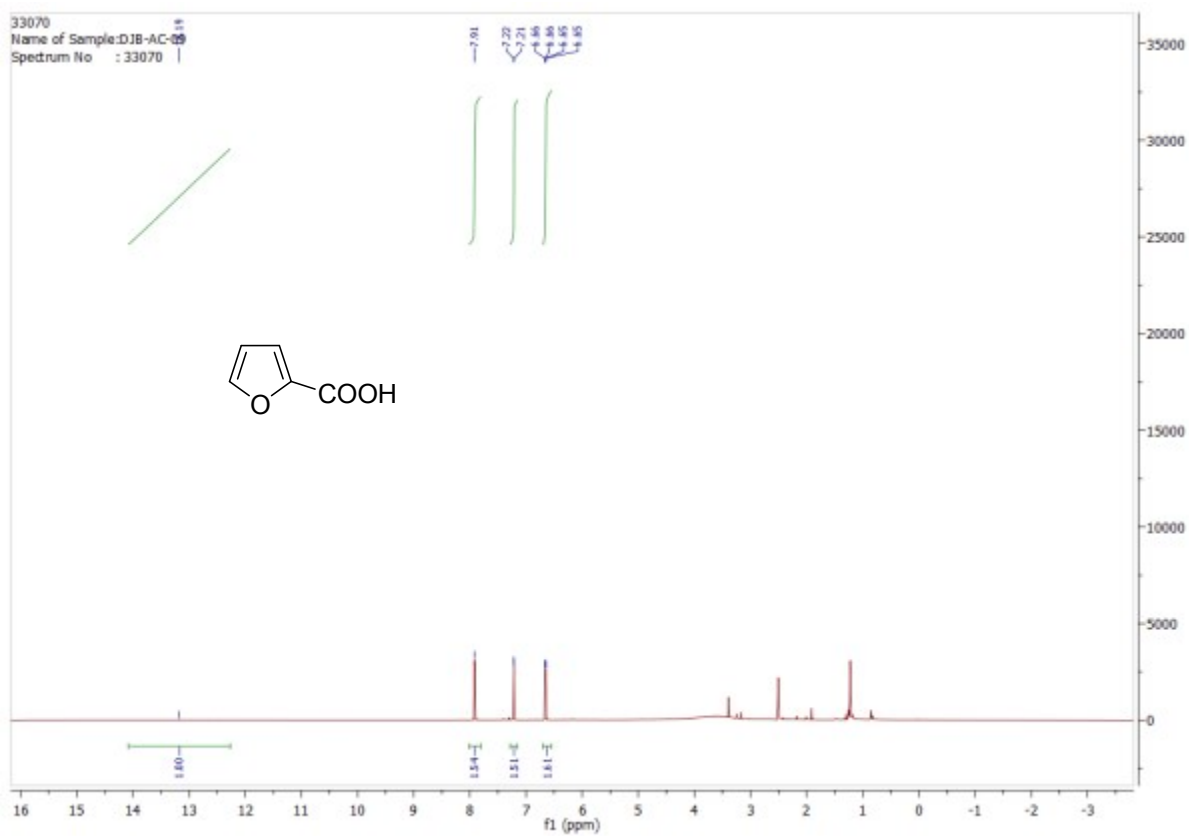

Figure S54. <sup>1</sup>H NMR of Acid **14** in DMSO-d<sub>6</sub> (Table 2, Entry 14)

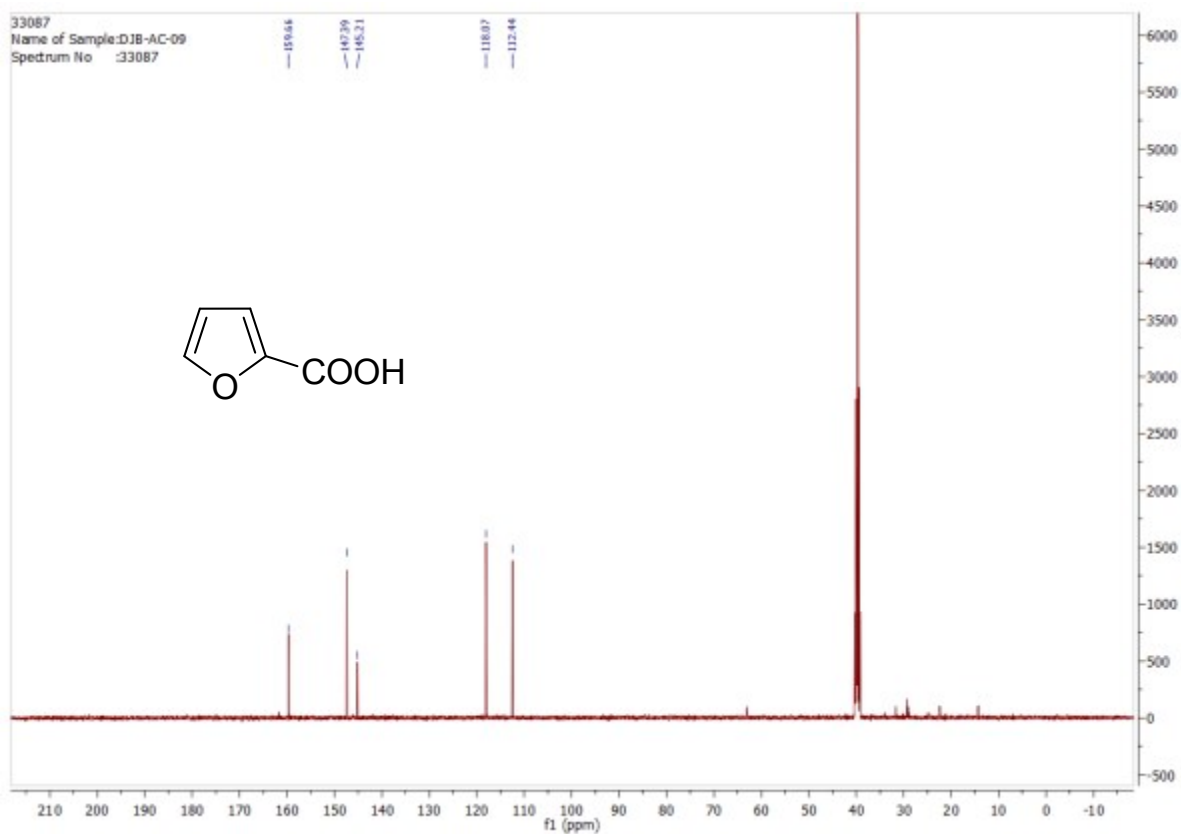

Figure S55.  $^{13}\text{C}$  NMR of Acid **14** in  $\text{DMSO-d}_6$  ( Table 2, Entry 14)

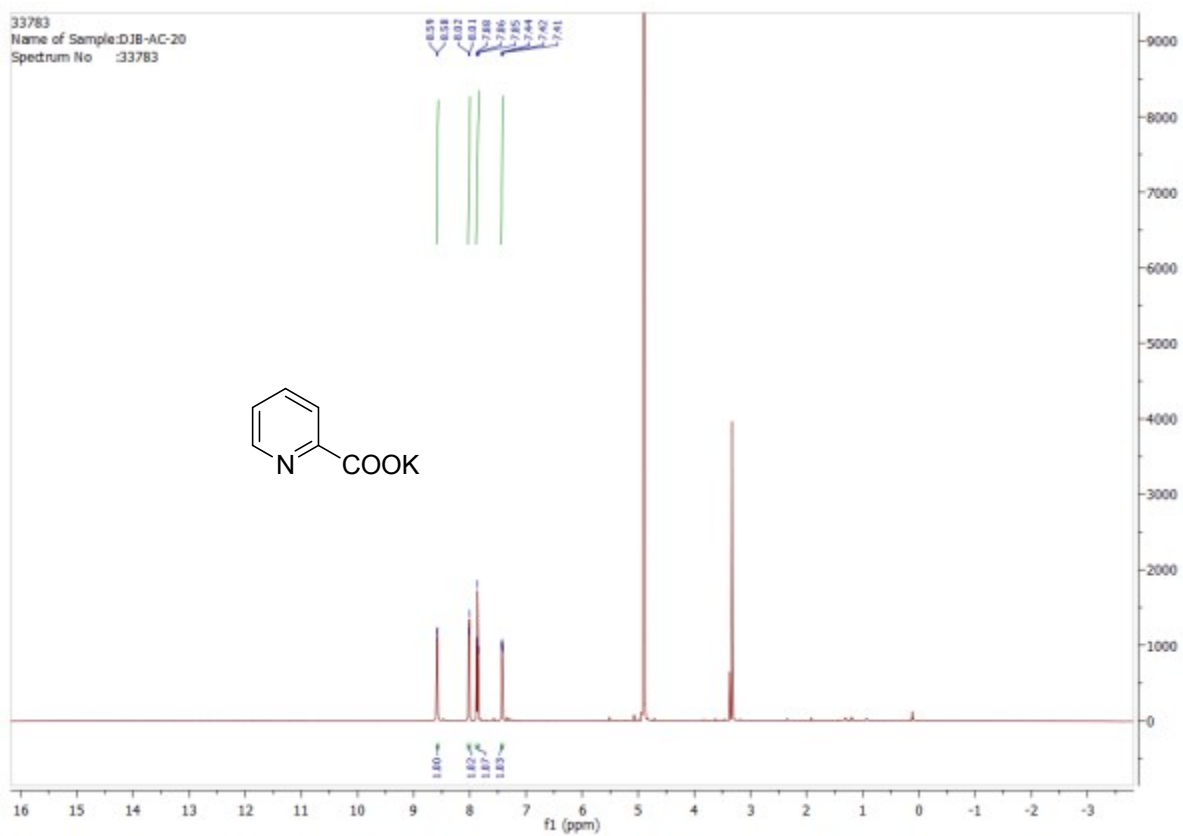

Figure S56.  $^1\text{H}$  NMR of Acid salt **15** in  $\text{DMSO-d}_6$  (Table 2, Entry 15)

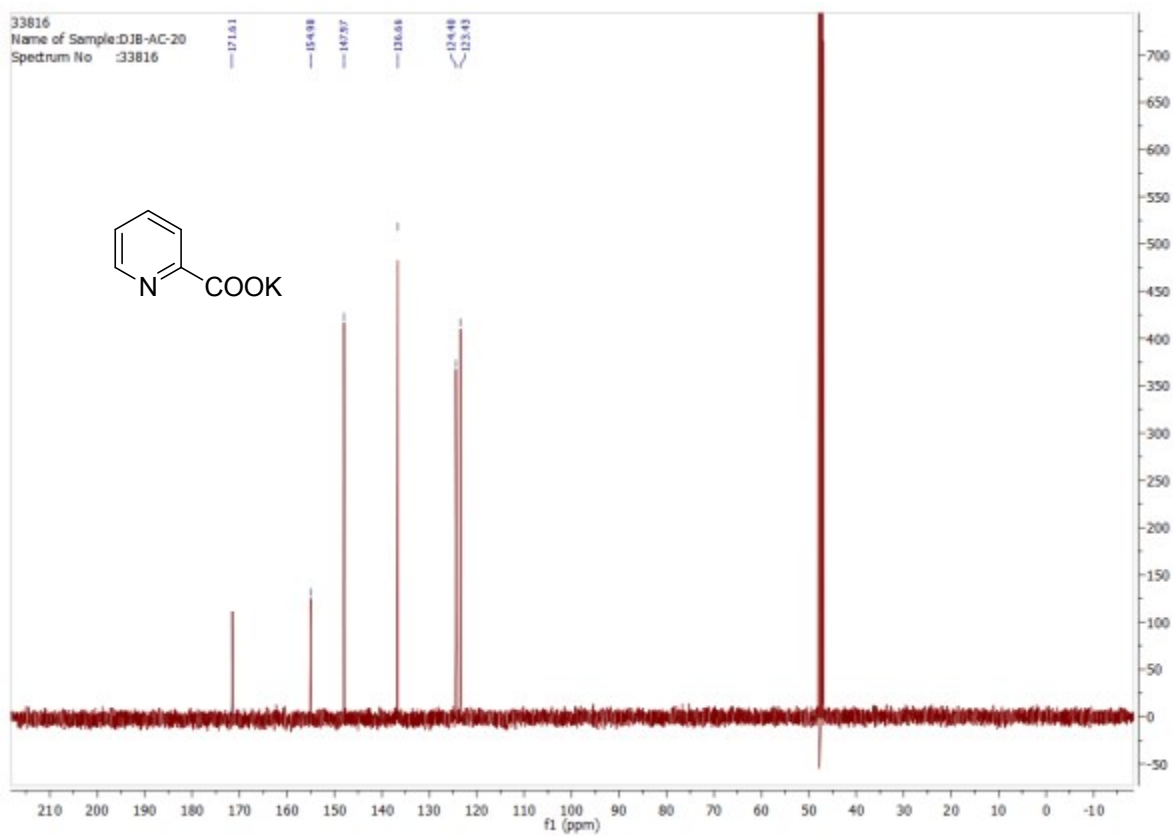

Figure S57.  $^{13}\text{C}$  NMR of Acid salt **15** in  $\text{DMSO-d}_6$  ( Table 2, Entry 15)

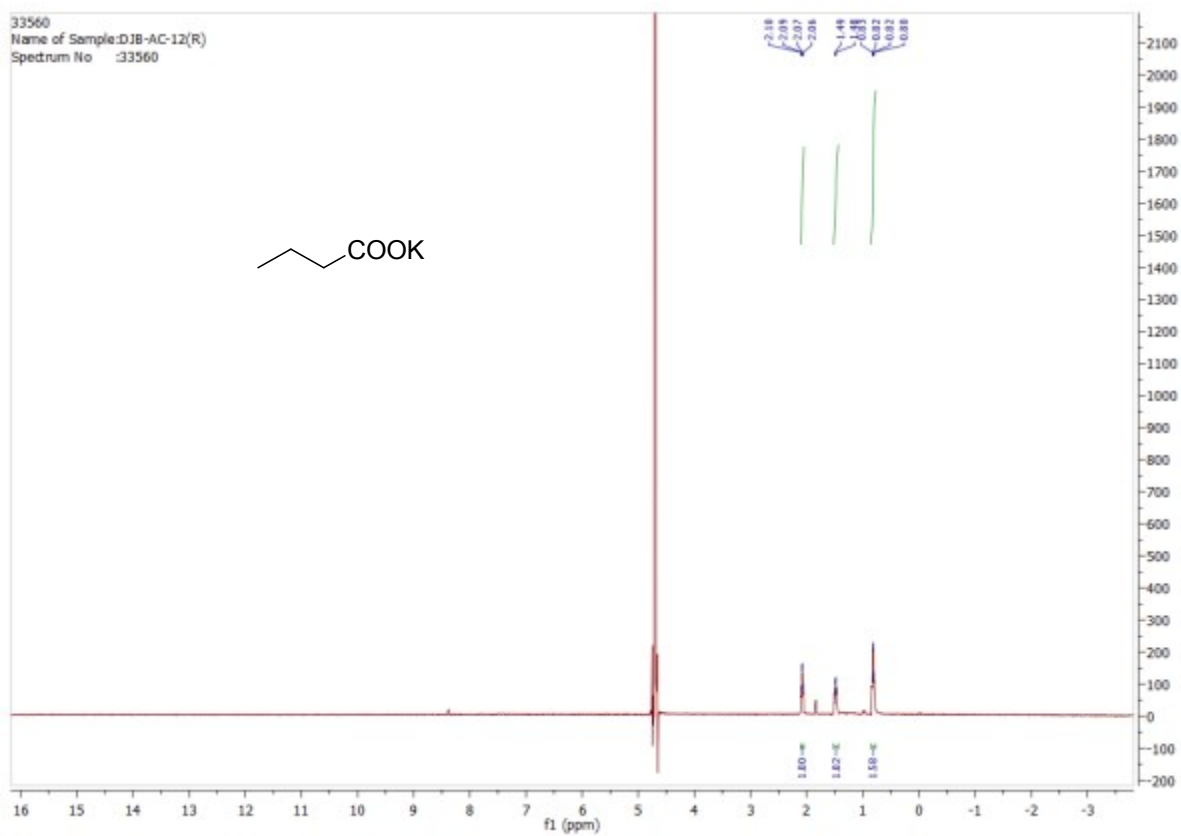

Figure S58.  $^1\text{H}$  NMR of Acid Salt **16** in  $\text{DMSO-d}_6$  (Table 2, Entry 16)

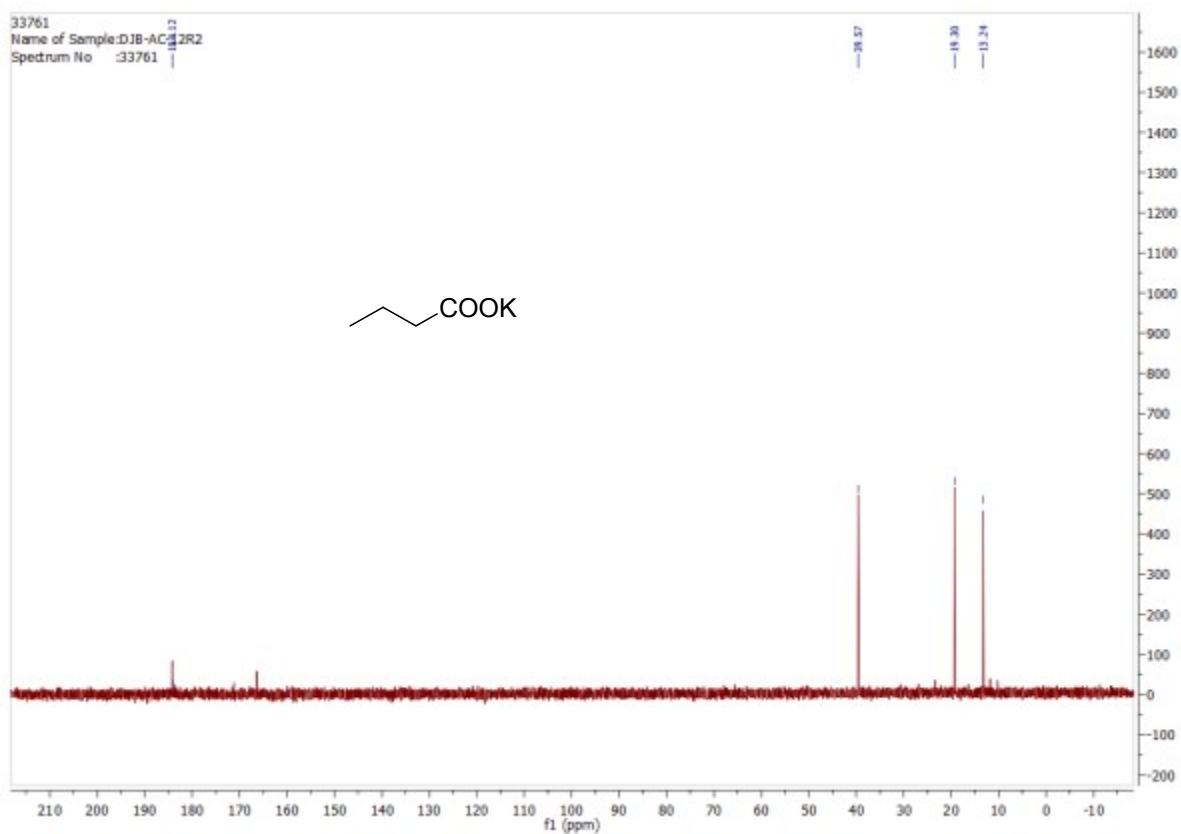

Figure S59.  $^{13}\text{C}$  NMR Spectra of Acid Salt **16** in  $\text{DMSO-d}_6$  (Table 2, Entry 16)

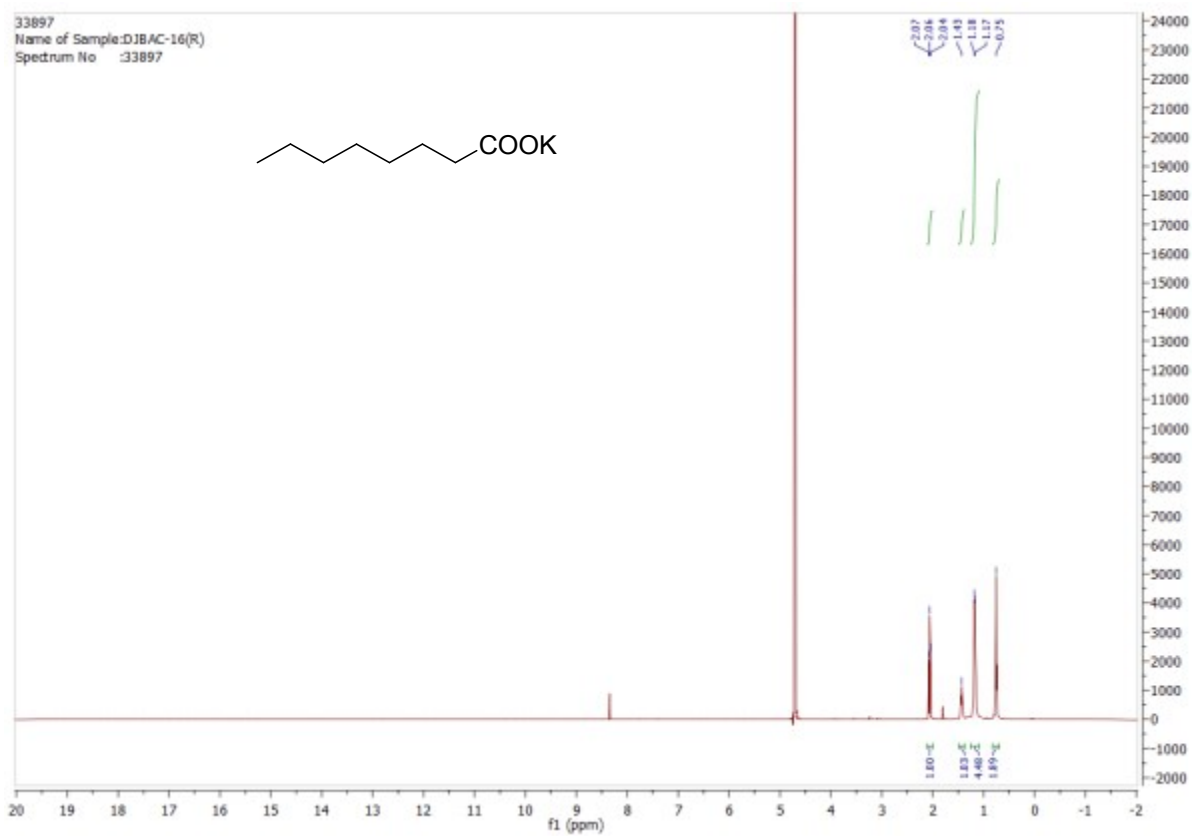

Figure S60.  $^1\text{H}$  NMR of Acid Salt **17** in  $\text{DMSO-d}_6$  (Table 2, Entry 17)

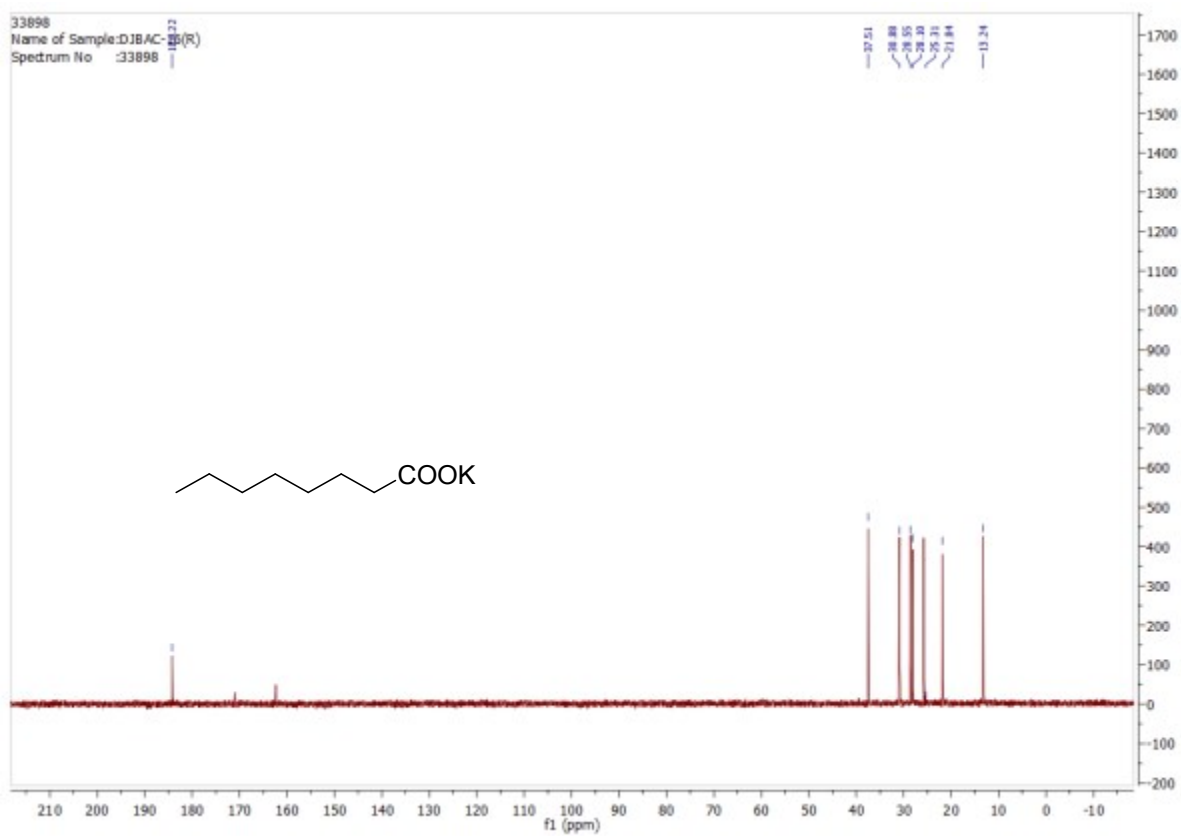

Figure S61.  $^{13}\text{C}$  NMR of Acid Salt 17 in  $\text{DMSO-d}_6$  (Table 2, Entry 17)



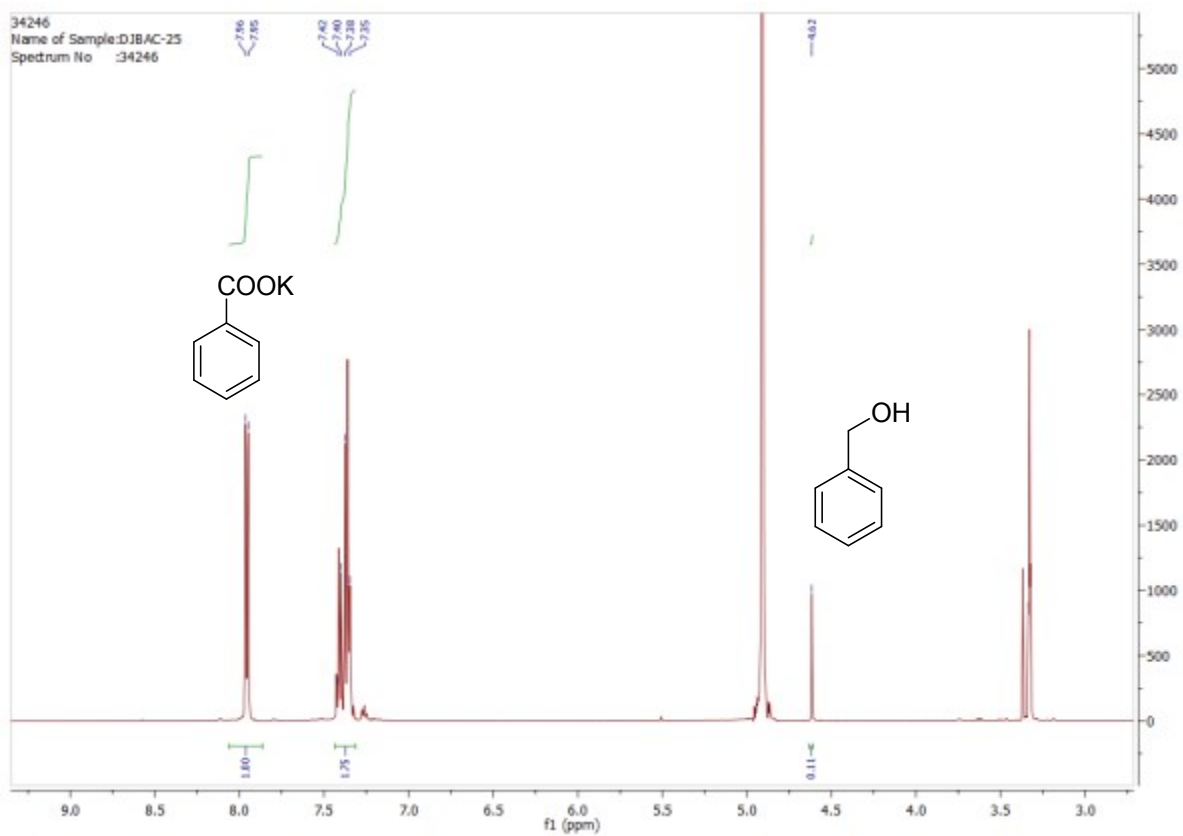

Figure S62.  $^1\text{H}$  NMR of reaction products (dehydrogenation of benzaldehyde) in  $\text{CD}_3\text{OD}$ .

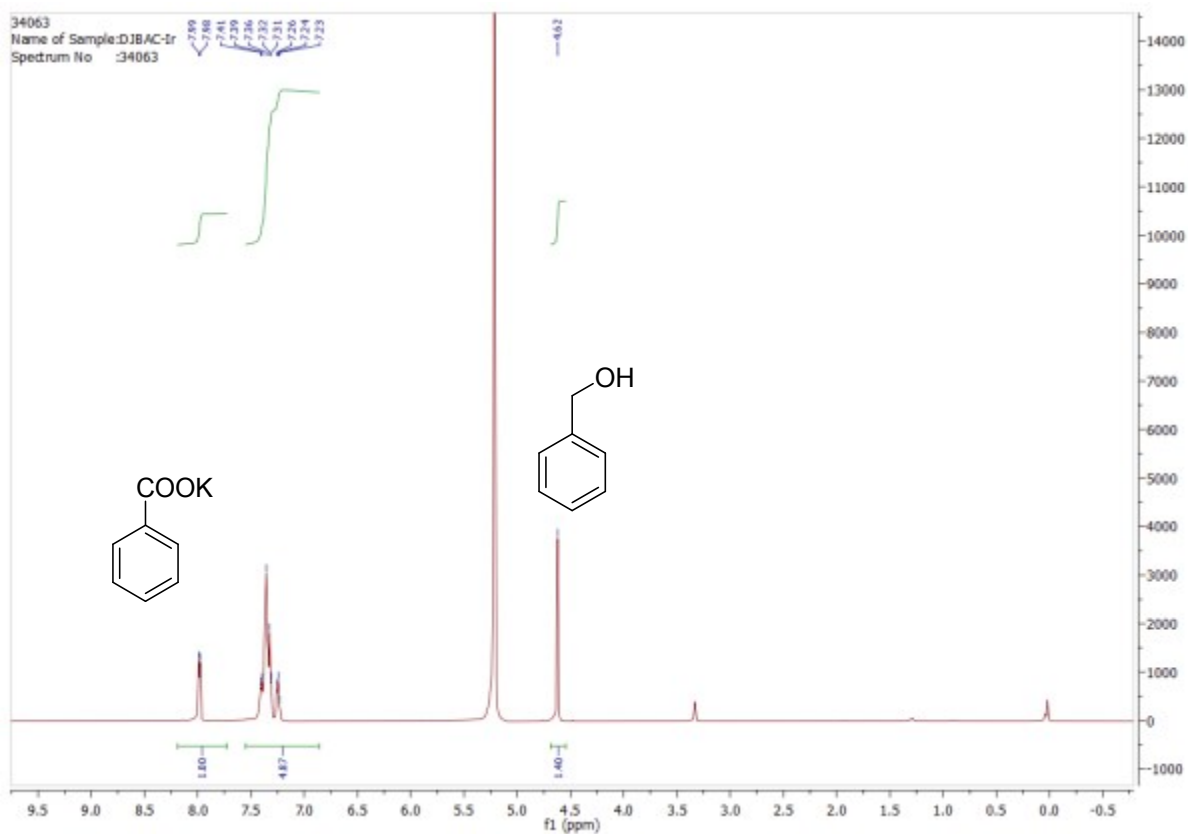

Figure S63. <sup>1</sup>H NMR of reaction products (dehydrogenation of benzyl alcohol) in CD<sub>3</sub>OD catalysed by [Ir(Cp\*)Cl<sub>2</sub>]<sub>2</sub>.

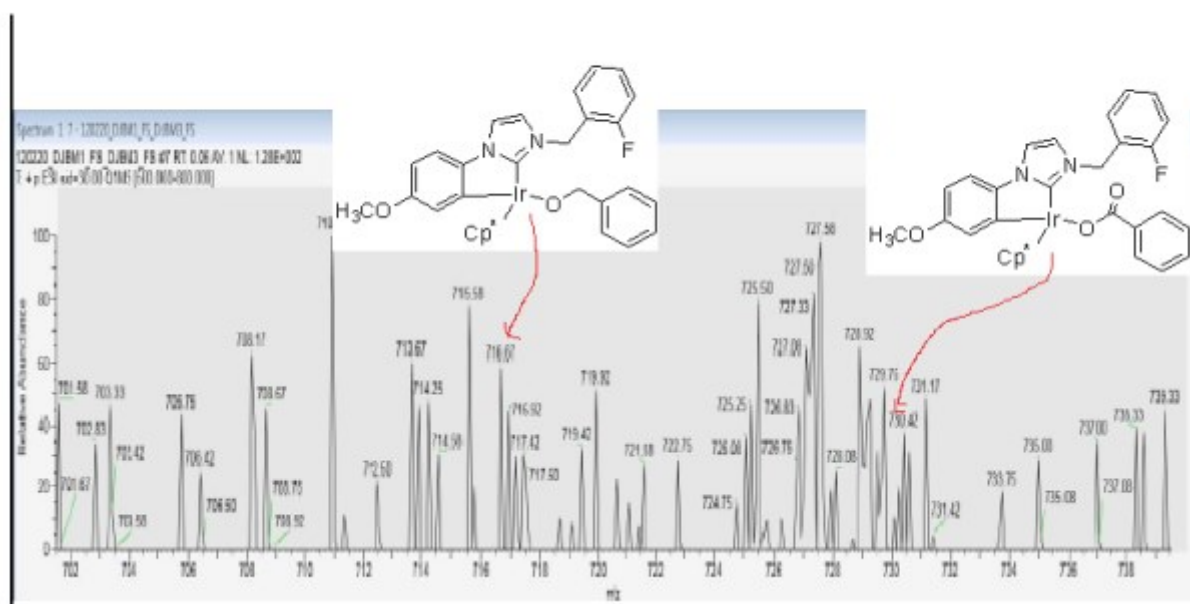

Figure S64. ESI-MS spectrum of the catalytic reaction mixture. Catalyst **1a** (0.1 mol%), KOH (1.1 mmol), benzyl alcohol (1 mmol), Toluene (10 mL), Refluxing conditions. The spectrum was recorded after 30 minutes of the reaction time.

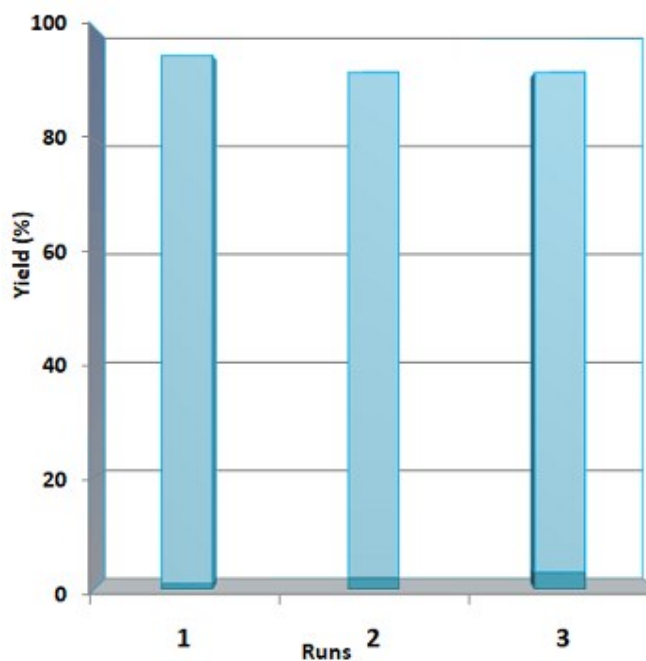

Figure S65. Reusability of catalyst **1a** for dehydrogenation reactions of benzyl alcohol to benzoic acid under standard conditions.

| Crystal Data                                                                       | <b>1a</b>                                             |
|------------------------------------------------------------------------------------|-------------------------------------------------------|
| Formula unit                                                                       | C <sub>27</sub> H <sub>29</sub> BrFIrN <sub>2</sub> O |
| Formula wt.                                                                        | 688.63                                                |
| Crystal system                                                                     | monoclinic                                            |
| T [K]                                                                              | 100                                                   |
| <i>a</i> [Å]                                                                       | 11.135(6)                                             |
| <i>b</i> [Å]                                                                       | 16.187(9)                                             |
| <i>c</i> [Å]                                                                       | 14.755(8)                                             |
| $\alpha$ [°]                                                                       | 90                                                    |
| $\beta$ [°]                                                                        | 107.165(8)                                            |
| $\gamma$ [°]                                                                       | 90                                                    |
| Volume [Å <sup>3</sup> ]                                                           | 2541(2)                                               |
| Space group                                                                        | <i>P</i> 2 <sub>1</sub> / <i>n</i>                    |
| <i>Z</i>                                                                           | 4                                                     |
| <i>D</i> <sub>calc</sub> [g cm <sup>-3</sup> ]                                     | 1.800                                                 |
| $\mu$ /mm <sup>-1</sup>                                                            | 6.856                                                 |
| Reflns. Collected                                                                  | 38113                                                 |
| Unique reflns.                                                                     | 6584                                                  |
| Observed reflns.                                                                   | 3549                                                  |
| <i>R</i> <sub>1</sub> [ <i>I</i> >2 $\sigma$ ( <i>I</i> )], <i>wR</i> <sub>2</sub> | 0.0676, 0.1571                                        |
| GOF                                                                                | 0.999                                                 |
| Instrument                                                                         | Bruker APEX-II CCD                                    |
| X-ray                                                                              | MoK $\alpha$                                          |
| CCDC Reference No.                                                                 | 1973746                                               |

Table S1: Crystallographic data

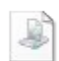

BB.cif
